# Supplementary material
Source: publisher figshare collection journal article supplement (https://gsajournals.figshare.com/ndownloader/files/26708579)
Supplement: Supplementary file 1 [file 26708579]

## Sheet: TableS1
ID	Linkage_Group	cMorgans	SNP_Position	P_campbelli	P_sungorus	Sequence
15381	1	0	40	G	T	TGCAGGCACATGTGTCCACCCTGCCTCTGTGGATTTGCTKTACGCTGGGTTACACCAGGCATAACCCTTAGTGATGAGAAGTGTGCGGTGCACTCC
5535	1	2.27549	58	C	T	TGCAGGGGAGGGGGAAGCGGTAGCTGCTTCAATAGCAGCCATCTATTCCGTGAGTCTYGAGAGGTGACTGGAGTCAGCTTGGGCACTTGAGCTCTA
15530	1	2.27549	15	C	T	TGCAGGAAGCAGGAYAGCCAAGAGATACAGGCAGGGCTTTGCATTGCTTGCTGTGTTTCCTGGCTTTGGATCATGGTCCCCTGATGCTGACGCTAA
12062	1	2.27549	89	G	C	TGCAGGGTAGCTATAGCCATGCCATGACTCAGTTGTATGAACCTCCCCATGTGGCTGACTTCCAGCCATGGTATGACCTCGAAGCACTSGGGTGAG
9288	1	2.81269	37	C	G	TGCAGGGACTCTCAGACACCCTTACAGAGCTGACCCSATTTGTATCTAATTCTGTGCGGTAGTCACTGTCTGCCCACAACCTCTTTCTCACATCTG
10399	1	3.35035	75	A	C	TGCAGGAATCTCAGCAGGATGGACAGTGTCCTTTCCAGGTGCCTCAGCTGGTGTACACCTCTCCCAGGCAGCTCMCTGCTTTCTGTTTCTCCCAGG
2303	1	3.35035	29	G	C	TGCAGGTGGCCCTGAGGCCTGAGAACAGSAGTCACCAGGCTGGGTCATCTGTGTAACAGAGGGCCTCAGATGACAGCAGAGCAAGGACCCTTTCCT
5820	1	3.35035	55	A	G	TGCAGGACGATGGAAGGTACCCGTGGGCCTGCGTCAGGCAAGCAGAGTCAGGATRGGAAGAGGAGTGGGGACCCCAGGAGCCCCCAAAGCTCCTTC
3111	1	3.88802	75	G	A	TGCAGGTTTCTGAATCTCAGCTCTTCTTTGCCCTTGCTCCTATCTCTGCAGGTTATGCAGAGGGAAACAGTAACRGTGTAAAGTGGGCATTCAGTA
12240	1	3.88802	90	G	A	TGCAGGAAGAGAAAAACACTGAATTTTGCCAGAATGGTATCTGAGTAAACAGTGTGGACAGCTGCTCCTCCCTGCCTCAGCCAAGGAGARTCTGTT
3164	1	4.4306	89	A	G	TGCAGGCTGGATAGGGCTGGAAGGCCTGGTTTCACATTGCCACACTCACAGTGGCAGCCCACCGTTTCTGGGCATCCCCTTCCTCATCRCATGGAC
4309	1	7.20667	71	G	A	TGCAGGGTTGACTCACAAGAGAGGCCTACCGCAGATCAGAGGACAGTGTAGCTCATCAGTTCCACGGGGCRAGCAAAATGTCTGAGTGACTTCTTC
3124	1	7.20667	11	C	T	TGCAGGCCTTYGCCTCACGTGCCACTGCACCTTGGGTCCATGTTCCAGACTCATCCCCACAACAGCCACACCCAGCACCTTCTTGGACTCCACCCA
14040	1	8.32468	12	A	G	TGCAGGCCCTGRCTTCTTTTCATGATGAACTTGGATGAGTACTTGGTCGCCAAATTAACCCTTTCCTCCCAGGTGACTTTAGATGCTGTTTCACTG
5587	1	9.99786	54	G	A	TGCAGGACTGGGGAGCATCCCAGATGCTCAGAGCATCTCCTCTGCCCAGCAGTRGATACTGGTCTAACAGTTTCCAGGCTCATGAGCTTCTGTCCT
11847	1	9.99786	50	C	A	TGCAGGAGAATTACCATCTTTGGGATATTGTCACTTAGGAAAACATCATMATAGAGAAGATGCAAACACAACCCCAATTCAGGTCCTAGCGTCTTC
1437	1	10.5355	40	G	A	TGCAGGCCCAGCATTGAAATACATGAGTCTATGAGGGCCRTTCCTACTCAAACCACCACAAGGGTGGAGCTGTGAGGCGTTCACGGGGAGAACCCT
16121	1	11.0732	34	T	C	TGCAGGGAGGCAGGAAGTCCTGTCAGGGAAGCCYCCTCTCCTATTCACTTCACAGCTCTCTGGGCTCCCAGGGCAGTGGGGTTGGCTTTGGATATG
15302	1	11.0732	86	T	C	TGCAGGGAGACTTGGAAGAAAGGCAGGACTGATCAAGGCTTGGGGAGTAGACTCAGTGGCAGACAAGGCCCTGGGTATGGAAAGAYGGTGTCCAGA
5342	1	11.6108	15	G	T	TGCAGGAGCGCATGKGAAGGACTCCAGCAGCTCTTGGGCTCCTCACTATGGCTGCTGCTCCCCTGGTACCCCCAGTCACTCTTACCAGGGAAATGC
16463	1	11.6108	51	C	G	TGCAGGCAGCTGCTGTTTTCTTCACTTAAGGGGAAGGGCTCCCTGGAAACSGTGCTCAGGGCCTGGAAACCGTGCTCAGGGCTGCACTTTCCTGTT
10098	1	11.6108	72	T	C	TGCAGGCATAGCCACACAGGCAGGGCGGCTCTGCTAGGCAATCCACAACAATCTAGAGTGCTGGCTTAAAAYGCACAGCAATTTGTCCAATGAACG
3256	1	14.3707	78	C	T	TGCAGGTAAGGACAGGGGCACTGCACAAGGACAGCGGCACGGCACATCCTGGCATATCCTGCTGAGTCAGGGGCCTGYATCCTGCTGGGCCTTTTC
8755	1	14.8971	68	G	C	TGCAGGAGGTGGATTTAGTCTGCCTTGACCAGGCAATGATTCTCAAACTTCCTTGTGCCTCAGAATCSCCTGGAAGGTTTGTTAAAACCTAGCCTA
733	1	14.8971	53	A	G	TGCAGGGCAGAGACAGGTAGAAGCCATGCCACTGCACTTGGTGACCCTCCCCRTGCCTTCCTCTCCTCCTCCTGCCTCACTGCAAACTCAACCACG
1325	1	14.8971	31	T	C	TGCAGGAGTCCCCAGCCTCTCCCAGCAGCTYGTGCACCGCGCTGGAGGACAGCAGGCCCGCGTCCCAGGCTGTCGCCGCACAGGTACGTATCCCCG
13781	1	14.8971	48	A	T	TGCAGGAAGGAAGCTGAGTGGGAGAGGGAGCAGCAAGGGCACTCAGAWGAACTGTCTCTCTGCAAGAGGGGAGACATTGCAGGCCTGCCTGGACTA
5444	1	14.8971	43	T	C	TGCAGGCCCCAACAAGGTACAGATGCAACACAGCACAGATGGYCCATGTTTTCCAACTCTGGGACAGCACAACCCTATCCAGAAGTGACAGCGAGG
6257	1	16.5334	90	A	G	TGCAGGCTGCTTCCTCCCAGAGCCCACAGGAAGCTAGTCCGCTCATACTGTGAGAATGAGAGTCCTCAATGGCACCACACCAGTACATARAGACAT
3075	1	17.0655	32	G	A	TGCAGGCCACCAGCAAATGCATGTGGTTGATRATTTGATTTGCCGATATCAGTAAGCACTGAATGCTTGCTAACCTCTTCATGAACTCATGGATGC
2478	1	17.6096	25	C	T	TGCAGGGTGCATGTGGGTATTTTTYTAGAGTGCCCCTTAAATATGCATAAGACATTGGTTTTTGATGCTTTGAAACTTACTTTTCCTCTGGGTACT
16314	1	18.1537	68	C	T	TGCAGGGGGCAGCACTGCATGTTCCACCCAACATGGAGACTCCTGTCTCACTGCTGGGTCCCACAATYCCACGGCAGGACACGAACTTTCAGCTGC
5897	1	18.6913	72	T	C	TGCAGGACTAACCACCTCTAGGCTGAGACTGTGGCGAAGAGGCTGTACCCTGGAGTAGGGGCATCACCTCAYTGGAACCAGATTGATCCAGCCTAG
11034	1	18.6913	32	T	G	TGCAGGCCTTGTCCACTCCACCCTGCTGTGCKGGACCCAGTTGTGTTTCTTCATTAGTGTCCTGGCTTTCTTGAAGTATAGGTGTTTTCCCATGTT
13461	1	18.6913	80	C	A	TGCAGGAGAAAACATGGCTGCAATATTTCCACAAGACAACAGAAGCAGTCAGGTTCTCCTAAAATGTCACAACCCACCCMACCCAAATCACAAAGC
1202	1	19.2291	18	C	T	TGCAGGAACACAAGCTTYCCACTCCGCCCCTACCCCACTGTAACCCACAGCCTCTGGCAACCCGCCTCCCAAACTGCACATTTTCTCATCCTTTAC
4838	1	19.2291	14	C	T	TGCAGGCCCGTTCYTGACTTGCCCACAGTAGGTTCCCAAAGCACACTTACCACTAAAGGACCAAGAATTCGGTGATGAACCTCAGGAGGCTGAGAC
7125	1	19.2291	62	A	C	TGCAGGAAGATTTAAACATGTGGACTATGTCTTAGGGTTACTATTGTTACAATGGCTGGACMCTCCCACATCAATCACTAATTAAGAAAATACCCC
12418	1	21.9805	79	A	C	TGCAGGGAAGCTCCTCAAACAGGAAGGTAAATAACTCAAGACAGCTTCTGGAAGTCCCTGAAACTGACCAGATTCACTMGCCCCTCCCTCCCAGAG
10574	1	24.1643	52	G	A	TGCAGGGTCTAGGTTTAGTCTGTAGGTTTAGTTTACATGATTTCCAGTAGCRTGTGAGTACTTGTCCTTCTTAGCCCAGTTTATGGATACCAAGTT
8365	1	24.1643	31	T	C	TGCAGGGGTCCGTGGAGGCAAAGGAGGGGAYAAGAAGTGGGTGGCTGGGTGTGTGGTGTGTGTTTGGTCTCAGTCTCCCCTGGAGATTTGAACTCT
3163	1	26.4108	82	C	T	TGCAGGCTTTGAGAAGCTTTGCCACTGAGTCTGGGTCCCATTCTGCAGCTGAAAAACATTACTAACCATGTACTCATCTGGYAGATAAATCTTGCT
385	1	29.2279	42	T	C	TGCAGGGGCCACTAGGACTGAGGGACATTGCTGCTGCTGGGYCTGGTCACCTTCAACTTTGTGGGAGCCTTCATGCTGGAGATCGTGCTGGACCAG
14061	1	30.9649	38	C	G	TGCAGGGACCAACTTCCCAGTGCCCTTTCTGATGGGCSTGCGCTGTCCCTGTCAATCAAATGCTTTTGGCTGCCAGTTGTCCTTTGTGGGACAGAA
13554	1	34.4165	60	T	C	TGCAGGTATGTACATTGGTGTTTTGCTGGCAATGTGTGTCTGTGTAAGGGTGTCAGATCYCCTGGAACTGGGGTTACAGACAGTTGTGAGCAGTCA
15604	1	34.4165	21	A	G	TGCAGGAACACTGAGAAATGRCCATGGTGGTAACACAGCAGCCTTGGCTGACAAACCCAGAGCACAAGTTCCGAAGCTCAGTGTTCATTTCATCTG
7752	1	36.6027	38	T	A	TGCAGGTCTCCTAAGGTTCCATATTGCTGTACCCTCAWGTTTCTCCCACTCCTCCCTATATCAGGGCAACACCCACATCCACGTAAAATGGAAAAG
13009	1	36.6027	21	A	G	TGCAGGGCCTCTTGCCCTTCRTGTCTCTTAAGTCTATCCCTTACCACCCCTTACCTTGTTCATGAACCCCACACACAAAGGCCGCCTTGGCAGTTG
3007	1	37.6809	78	C	T	TGCAGGCTGGAAGGAGATGAGCTGTCGCCTGCGCGCTAATGGCTACCTGTGCAAGTATCAGTTTGAAGCCCTGTGCCYTGCGCCACGCCCAGGATC
621	1	39.3369	34	A	T	TGCAGGGAGGCCACCATGAGGCTCTAGACTCATWGCCCTCTACTGGCCATAGGGGTATTCTACATGCTCTCACCCCATCTCACAGACTGCCAGCTG
2640	1	40.4372	39	C	T	TGCAGGGAATTTTCTTAGTGGTGCCATCCCTGGCTTGAYTCTATAAGAAAGTAGGCTGAATAAATCAGAGAGAGCAAGCCAGTAAGCAGCTCCTTC
8923	1	41.0297	37	C	T	TGCAGGGGACAAACATGATCTGCCTGCTGCTTTACTYATTGCAAGATGGAAATTAAAGCAGAAAACCTGACTTGTCCTTTCTGGCTTCATCTTCCA
939	1	44.7814	20	T	C	TGCAGGTTCTAATCATGTGYATACATGTGCTTTTATTTCTGTTTTTGCTGTTCTATTCATCACTAAACAATCCATGTCTTCTGAAGTACATTAAAT
5482	1	50.3472	32	A	C	TGCAGGTAAGGCGGGTCTGGCTGGTGAACACMCTGGGCTGTATCCTCCTTCTCCTGGCTGACCAAAAGGGGCATGCCCAGGAGACTTCACATCCTG
4199	1	53.7497	31	A	G	TGCAGGGACCTGGACCACTTTTCTCCAGGARGCATAACCACTTGTGGTGTGAACCTCTGAACAGGTAGCCATTGAGATTTCTCTTAGCCATTGCTA
1901	1	54.9284	16	T	G	TGCAGGTTCCAAGTCKACCCTCTCTATACTCTACCTTCAAGTCTCTACTTCGAAGAGAGGCGTCTGTCTCGTCCAATCAGGACCTAGGGGCACTTT
14397	1	57.4713	52	G	A	TGCAGGGAAGGGGAAGGATATTTGCATATCCGAGATGCCTGGTCATAACCARGCCCCTTGAAGCCAGTCTATTTGAACAGCCTTTTTAAGGTTTCC
8174	1	59.9745	80	C	T	TGCAGGAGAGCCTAACGGTCTCAGGTCTACAAGAAAAAGGAAAGAGGTGGGGGTGACCAGCACTGTCCATTACCGTCCAYCTGGGAGGACAGAACC
12626	1	59.9745	23	A	G	TGCAGGGGGCGACAGAGTGAGTRGAGTAGAAAGGAGTATGTGCCACACAAAAAGAGAACCAGAAGCGCAAAGGCCCTGAGGCCAAGGAGTCCCGCT
16098	1	59.9745	60	C	T	TGCAGGATTCTGCTGAGTCAATGGTGAGGTCTCAGAGACCTGGGGTGTGAGAACAAGAGYCTCCTTGGGGGAGGGCAGGTGCCCTTTTCCCTCTGG
16036	1	61.055	46	A	G	TGCAGGTCCTATTAAACACTCCTTAGAAACTAGTCCATGGTCTCTRTGTTTCTCTGGGAGCAGAGGATTTAGGAACAGTATGATGGGAGAAAGAAG
14223	1	61.055	24	A	G	TGCAGGTGCAGGTGTTTGGCATTRTTGGTGGCACACAGTAGGTATGCACACTGGAACTGGGGGCTGGCAGGGCTGGCCATCCATCACGGAGGGAAC
1180	1	61.055	61	G	A	TGCAGGCTGTCATGATGGAATCCATTGGCTCAACTTGACACAACTTAGAGTCATTTGGAARAAGTCACAATTGGGAAAATGCTGTGAGGTATTTTC
3602	1	62.1355	86	G	A	TGCAGGAGCTGAAGGACCTGAACCAGCGGCAGGCACATGTGGACTTTGAGGCCATGCTGTTGCAGCACCGCCTGTCACAGGAGCARCGGCGACAGC
2548	1	62.1355	88	A	G	TGCAGGACATCCTGGGTATTGCCTTCTGTCTGTACATGCTGAAGACCATCCGCCTGCCCACTTTCAAGGTGAGGGCTGCCAGTGAGCRTGGCAGGC
12345	1	62.1355	42	T	G	TGCAGGCCTTGGGGACATGGGAAACCAGGGTCATTCCCCATKCCAGAAGCATTCCCTCATACCTCATCTTCACCTTATGGTTGAAGATCACAGAAA
5657	1	62.1355	52	G	A	TGCAGGAGATGGTGGTCTGTCTAGGACCCTAGGGATGGTCCAGCCTGAGGTRACATTTGGAGTTGCAAGACTGAATTCAAGCTGACCCTTCAAGTC
2017	1	62.1355	92	T	C	TGCAGGAAGGTACACACCACCCCCAAGGGGGTAGACCCTTTGCACAACCATGACTGGTAAGGGCTGTGCCCTCAGTCACTAGACCTCACCCYATGT
2216	1	62.1355	31	T	C	TGCAGGGCATGCTGCAGCCTCCTCATCCCCYTCCTCCTCACAGTGCTCTTGGAAGGACCCTGAGGCTGAAGCTGCTATGGAGCTGGCACTGAGCAT
13635	1	62.1355	30	T	C	TGCAGGGGAGAAAATCAGTCCAGCCAGCAYAGGGGAGAACCGTTCCTGGGTTCTAGGGCATAGTGGGGGCTTCTGGAGTCGTGAGTGGTGCGAGAG
13678	1	62.1355	31	C	A	TGCAGGACAGACAGGAAGGTCTGGATATCTMCACTGTTTTAGCACCTCAGAGTGAGCAGCACTTGGGCATCCATGCCCCAAGGAAATATAACGAAA
8557	1	62.1355	91	A	G	TGCAGGGCCCTGTTTGACTACCATCCCGAGGCCCTGGATGAGCTGGCGCTACACAAGGGGGACCTGGTTAAAGTCTTGAGAAAGACAACARAGGAT
14750	1	62.6795	82	C	T	TGCAGGAGTAACCAGCGATCATTCCCTGCATTCATCTGGGTTTTACTGATGCCCATATTAACTGCAGCAATACCTGGCTGCYTGGGGGCTGTGAAA
4757	1	63.2235	71	T	C	TGCAGGGCAGACTTAATGAAGGGTGGGGCCTCACTTCAGGGCACCTGGCTGACCTCTGCATCCCTGTGGCYTCTGGAATCTGAGGACTGGACTGGG
6019	1	63.2235	46	G	C	TGCAGGCTTCAGGTGATTAGGCCAGGACAGAGATGTGGGATCCTGSTATGGGCTGAAGATGCTCACTAGCAGTGCTGGGAGGAGGTCAGAAAATAC
10005	1	63.7612	74	G	A	TGCAGGGCAGCCAGGTACTGTGTGGAAGTTGCCGCACGGAGGGTTGGAACCTCACCAGTGTGAGCTGACCTACRAAGAGCAGCAGAGTTCCAGCAG
7436	1	63.7612	13	T	G	TGCAGGAGCCTCKGTACTGGAGTGCCCCAGCTCATGTCCACTGGGGACTATGAATGTGCCTTTACCTGTCAACTGGGTCTTAAACCATGTCAAGAT
7093	1	64.8425	30	A	G	TGCAGGCCAGGGAACTCCTCCAGCGAGGCRGTAGGGCTCAGGCTGCCAACTTGGGACACTGGGGAATAGAGAGAGCCCCAGTCCCCATTAGAACTA
6625	1	64.8425	45	G	A	TGCAGGTGTCAAATAAGTGTAATGCAGAGAACAGGGTGAAGTGARAAAGGTGGGCTTCCTGCATCCTGGGAGCCAAGCCCAGCTTCCTGCATCCCA
7850	1	65.3802	19	T	C	TGCAGGCTAGATGTCCAGYCAGAGTCTGGTGTCCTGTGATTCTGCAGCCAGCTGAGGCAATATGCAGGTAGGACCTTTCAGAACTGCACCCTGGGG
7671	1	65.3802	39	G	A	TGCAGGGAGACATTTAAAATCCAAACATAACAGCATGTRAATTTTCATGAGGAATAAAGCAGTTCAGCATTTTGTTCTGTGAGTACCCTTCGATCA
8667	1	65.3802	68	G	A	TGCAGGGTGCCACCATGCTTCCTGGTGGGGAGGTGACAGCAGATAGGAGCTGAAGACAATGATATGGRTATGCACCCCATAATGTGGGAGCTGAGT
11111	1	65.3802	88	T	G	TGCAGGCTATGTGAGGTGAATGGCATCATGAAAGAAACAGAGAAACGGGCATGCTTATTTCTGCTTCCGCTGTGTGAGTGTGCCTGTKTGTGTTTC
2366	1	65.3802	18	C	T	TGCAGGTTATCTGTGGTYCAGCCTTGCCCTCAAGCACAAAGAGAGACAGACTGTTCCTCCCAAGGCATCCCAACTCCAGGCCTACCTTGCGTTTCC
9580	1	65.3802	34	G	A	TGCAGGACCAATCCAGGGGCAACTTCCCTTCCCRACCTGCCACTGCTGGTACTGCCTGGGTGCGGTGTCCTTCCCTGAACCCTAAGGTACTGAGCA
3816	1	65.3802	13	T	C	TGCAGGCCACACYGCGGTCTTCTTTCCCCTTGCATTTCAAAAGCCAAATGCTAGCTCTTTTGGGCAACTACTTACGCTCAGCACATGAACACCTCA
594	1	65.3802	19	T	G	TGCAGGTGCACTGTTGGTKGCTGCCTGGTGAATAAGGAGGACAGCGGTAAGGGAGCTGGGGACAAGCACCCGTTAGGTCAGTGCTCTACACCATAC
11399	1	65.3802	14	G	A	TGCAGGTAACCACRGCTGCCCAGATCTGCATCGAGACACCTAGACAGCCGCCCTTAAACAGCTGGGGCTGGGGTGTCTCCTCTACTCCCTTGTGAG
3349	1	65.3802	60	G	A	TGCAGGGTGGGCATCTTTAGGGACCCACCCCACAGTCACAGGACAGGCCAGCTGACTGCRAGGGCCACCCTCAGATGTACGGTGGCCATCTGGCCT
4474	1	65.3802	72	G	T	TGCAGGAGAGCAGTGTGGCAATTTGGCTTAGTGTGAGAACTCTGCTCTGAGAACTTTGGTTGGTTTTCACTKTTGACTTGCTGAGATTTGAAACCA
4590	1	65.3802	14	T	A	TGCAGGGTGAAATWCTCCCTGATGGGGAGGAACTGGCCTGAACCTGTACCTCTGTAAGGGTTCAAAATGCAATGTTTTCCCCAAGAATTTGTCATT
279	1	65.3802	58	C	T	TGCAGGTCAGTGTGATTGTGGGCAGTCTCAGCCTAGCTCCCTTGATTCTAGGCTGTGYCAAGTTAGCAGCTAAAGATGACTAGGGCATGAGACAAG
2261	1	65.9178	34	T	A	TGCAGGGCTGGCTATAGGAAGTACCAAGGGAACWCAATAATGTTCTGAGCTTTCTTGTCATCTCCCCTGGACAAATCTCTCCTTCCTAACTCTTGT
10051	1	66.4527	47	C	T	TGCAGGGACATTCCTTCAGCAGAAAGTTAACAACTCAAAGGAGCTTYAGGAAGTTCCTTAAACCGACCAGATTCACCAGGCCTCTCCCTACCAGGG
2028	1	67.5367	32	C	T	TGCAGGGATGGGTTTCATACGCAGGCTTCTGYGGCAGGGCCAGAGTTCCAGCAGGCTTGGGGGCTGGAGTCCTGGACGCCACCTTTGAACGGATGT
11992	1	67.5367	15	A	G	TGCAGGAAGTGGCGRGTTGTCCTGGCAACCCTGGACCGAGGCTTGCAGGCGGCGGTAAACGCCCTTGCTTTCGCTTTGCATCCTGGCATTCGGTAG
13773	1	67.5367	12	C	T	TGCAGGCACCCYAAGGGCTCTGGAGAGCTGTCAGGGTTTTCAGCTGTGAGCCTGGCATCTGGGTTGTTCGGGATGGGAAGGTGAAGGGGCAGGGTT
5476	1	68.0719	69	G	A	TGCAGGAGGCAGGGACCATTGGGGACTTGAAAGCAGGATGGAGGCTTGCTGTGATGAAGACTAGAGAARATGGATGGGGTAAATTAAGGCGCCTGC
16125	1	68.0719	39	T	A	TGCAGGGAAACTCATTAAAACTCAGGAAGTAACTCAATWGGTTCAGGATGTCTCCAAAACTGGACAGAATCTCCAGGCCCCTCCATCCCCAAGCTT
8925	1	68.0719	14	C	T	TGCAGGCTCCAAAYGACTGTTTCTTAATATCTCCAAACTGGAAATTTATTTTTCAGGGCTGGAGCAGACAAAGCAAAGCAGGTTGTGGAACATTAC
15242	1	68.6072	76	G	A	TGCAGGATACAGAGTGCGTCTCTGTCTCCGAGGATTAGTAGAACAGACCAACGGGTTTGAGGGAAGAGGCACTGTRCCCAATCTCAAAGTTTGGCG
7760	1	68.6072	50	C	T	TGCAGGGGCAGGCCTTGGGGCTCCTGGGGAATGTCATGGGAATACTCCTYCAGTCGCTCGACGCTCACCATCATGGCTTCCGTCTGTGTGAAGCTG
8327	1	68.6072	12	T	G	TGCAGGTCCAGKGTGAGTGGCTGTATTGTCCCGCCTCCACTGAGTGGAGGATCTTGGGAGCAGAGGTGGGGGTGGGCTCACTGACCCTCTGGGGAG
6672	1	68.6072	87	G	A	TGCAGGGCCATTATGAAACTCCATATTTGGTTCTAAGCGTAGCAGGTAGAATTCTAAGACAGTCCCACAAATTCTACGTTAGAGGCRCCCCTTTCA
2820	1	70.666	42	C	T	TGCAGGTTGAGATGTTGAACTCTCAGCTCCTTCTCCAGCACYGTGTCTGCCTGCACACCACTATGCTTCCCACCATGATGATGATGAACTAAGCCT
16396	1	70.666	56	G	A	TGCAGGACAGGTCTCAGGGAGATGGGATTTCAGGAGTGTGCAGCTCAGGGTCAGCRTCCACAGGATGAGCAGCATGCTAGAATCAGGGTGCTCTAG
6980	1	71.0804	53	C	T	TGCAGGTCCCAATAGACCACTTAGCCAAGGGTGCCCTGCTGTCTGCAATCTGYATAGGAGTGGGAACAGTGGGGGCAGGCCACATTTCACGCGGGG
11647	1	71.0804	15	C	A	TGCAGGGCCACTAGMGATGTCCTTTCTCTCTGCTCTCTGTGGCAGTGAGTTTGAATGATGGCACTTACAACCCACACTTCCCCCACCCCCTTTAGT
10171	1	71.0804	93	C	T	TGCAGGAACAGGGAGCAGAGAGCTCAGGTTGGAAATGGTGACAGGAACAAGCTTGAAAGCCTGCTTCTGGGCCCTGCATCTATCAGCTATGCYTGC
12399	1	71.8098	30	C	T	TGCAGGTGTGCTAATCAATCTTGCCTAAAYGGATGATAGTTACTATTCACTTTGATCCATGATGATCTTGTAAGAAAACTTTGTACTCTGTGAAAT
14101	1	71.8098	50	G	A	TGCAGGTTAAGTGGGAGACCTGTTTCAAAGACGAACGTGGGGAGTGATTRAGGATGACACCTGCCTTCGTCAGCTTCTGGTCTTACTGCCCTCAAC
15599	1	71.9994	54	G	A	TGCAGGCCTCTTGGGGCTCCCCTGAGCAGCAACATCAAAGTCAGCATAGAGCTRGAAGCTGGTGGCCAGCCATGTGGAATTACAGCCCAGGCTGTG
12029	1	71.9994	64	C	T	TGCAGGTGTTGGCCATCTTCCCCTGCCAGGGGCTAGGCTACTCCATCTCCATCTACAGCACCGYCTCAGTCAGAATTCAGGGTTTGTTTTCTTAAT
15607	1	71.9994	77	G	T	TGCAGGCTGCCTGGTCCCACCGCTGTGCTAACCCCAAATAACACGCTGAGACTCTGTATTTGATACAATCTTGTTGKCTAGTTACTATCATTGTTT
14575	1	73.0806	48	G	A	TGCAGGGATACCCTGGCCTCGCGCCAAGGCTTCTGGTGGGAAGAGACRTAGCAAGACCTTAGTGTTTGGAGAATCCGCCACCCTTTGCAGCCGCCT
8167	1	73.0806	34	T	A	TGCAGGCTCCCCATCAGACATCCCAATAACGACWTCCCCCTGGACTGGACCAATTCCCTTGATCAGAAGGACCCTGTCCTTTCCCATCCCACATCC
8513	1	73.6183	41	C	T	TGCAGGGAATGTTTCAATTCAAAAGAAGCTGCTAATCTGCYACTCCACAAAAGCCCCTGATGACCTCAGGCTGCCTGCATCTGTCCTTTACACCTT
384	1	74.156	63	G	A	TGCAGGTTCTTCAGCTCTGCCACACAAGTCAAGGTCCCATTGCCCAGTGGTGTGAGAGCCAGRATACTCAAGGCACTGGTAAGGTCGCCTGGTTCC
14157	1	74.6936	78	T	C	TGCAGGGTTGGGGAGGGGGAGCTGCTGCTAACCAACATGGCAAACACATGTCCTGGATTTTCTGAGATCGGCTCACTYTCTAATATTAGGTTTCCA
11242	1	74.6936	78	C	T	TGCAGGAACCTCTCTGTGGGCACATCCCAGAGCAAAGAGCCTTTCTTTCCCTCAGCCAGTCTTGCTGCCTGCACCCTYACCAAGAGTTCCCCTTAA
1436	1	74.6936	16	A	G	TGCAGGTGCCCTATTRTTCTTTGCTCCAGGGCTTCATGCCACAGTTACAGCTGCCTCCTTCCTTAATGATAACTTTGTATTGTACTGTTTTGACCT
8367	1	74.6936	18	T	C	TGCAGGTAAAATTAAAAYGGGAAGAAAGAAGGATAAGAAATTAGCAAGTGTACCCCACACACAAGTAGGTAGTAAAGACCTGTGAGAGCCAAGCAT
12622	1	74.6936	45	C	T	TGCAGGACACACTGAGGCAGGTCTGTCCCCTCCCCAGCTCTTGGYGTCTCACCTATACAGCTAAGGGCTCAAGCAAGAATTCTAGTCATTTCCAGC
2133	1	74.6936	14	G	A	TGCAGGTCACAAGRTTTTCTATGTATTGATGGTAGCTGGGGCGGCGGAGGGGGACTGGAGGTACTTGGGATAGAAGCGCTGGTCGAAGAGGCCCCT
10667	1	75.2312	35	C	T	TGCAGGCTGGGTCAAGCTCAGGGGAGGGGCCTGTYTGGAATATATAGCCCACTGTGTTAGAGAACGGGTGGGGGCACTCAGAGAGACTTTCTAGGG
16506	1	75.2312	29	G	C	TGCAGGAAGGGTGTGGGGAACCGCAACASACTGGGCACTCTCGCCCCCAAGTATCGGTGTCAGAGGGCAATAGCATCAGAAGCCAATAGCATTCCA
11441	1	75.2312	37	C	T	TGCAGGAAAGACAAGCCAAGAGATGGGCAGACACCAYTCTGGCATGCAGAATTGCTAGGGAAATGTCCAGGGTAGTACACTCACTCATGCAGGACC
4020	1	75.7689	79	C	T	TGCAGGGCTGCCCAAGCCTGGGTGGCAGGAGCGCTTGCTTCGTAGCTCATCCAAGGTGAAGGAGTAGGAGCTGTCCCTYCGCACCACAGCCACCAC
5866	1	75.7689	30	C	T	TGCAGGGTTTTCTCCATGGTGCCCAAAGGYAGTAATTCCCTGTGGTGACCCTGAATTTCCCATAAGCCGTTTAGCCCATGTTGATGGATGAACTTT
9088	1	77.8151	25	A	G	TGCAGGTCTACAAGGAAATTGTTCRCTGCTGCCACGAGCAGGTCTTCACATTAGCCACAGAGCAGACCTATGCTGTGGAGGGGGAGACACCCATCA
13413	1	77.8151	87	G	A	TGCAGGCTCAAAGTGTCATGTGGCATTTTATATGCTCTTGAGGTGATGGGTGTGTAGAGGTGAAGGACTCTTAGCCTCAGGATAGARCACTGTTGA
15899	1	78.4948	19	G	C	TGCAGGTAACTGCCTGTCSAATCCTTTCTGCTGGCTGCCTTCTGAATATTTGCCTGCAAAGAAGCATCTCCTGTCAGTTACCTGTCTGTCAAGGCT
6249	1	79.7226	54	A	G	TGCAGGAACTCAGGGTGGACCCACAGAGATAGTCGGATCTCTGGGAGTGGCTCRGAATTCCATTAGAAGACCAGTGGTGGGGGTCAGAGACCAGAC
5385	1	79.7226	70	C	T	TGCAGGCAGGCTACTCCATCACCCCCAAACGCCACCCATTGAACTCCACAACCCACAAGTCCCACCCCAYCTAACAAACTCAGGGAACCCATCACT
9936	1	83.4881	15	A	G	TGCAGGGCAGAGGARGGCACCAGATCGCATGTGATTGCTGGGAATTGAACCTGGGTCCTCTGAAAGAGCAGCCAGCGCTCTTAACCTCTGTACCAT
16409	1	84.2265	30	T	C	TGCAGGCAGATTCTGCCCTTCCCACAGGGYGTCCCCTCTACCGCAGGCAGCTTCTTGGTCAGACACACCATTTGGCCTTGGCGCACCACGGCACAC
160	1	84.2265	16	G	A	TGCAGGGTGAACACTRCCCAGGGGCTGTAAAATCTCCCTGAAGTGGCGTTTTCCCTTTGCATAAGGACACCAGGTACATCTGAGCCTAAAGCTTTG
9867	1	84.4386	37	C	T	TGCAGGGTTACTGTGATAAAGGAGAATCCTATTGTAYCTCTCCCATGTTTAGCTAACTCAAGTGCCACTTAAATGATTAAATAAAGTCTGCCATGC
1793	1	84.9777	12	G	A	TGCAGGCCTGARCATACCCCTTTCTGAAAATACCCACCTTCAGGAAGACACGCTAAGAACTTGGGCTAAAGGATGCCTCCTAACCAGGTTTCTTCA
12572	1	84.9777	87	C	T	TGCAGGTCTCTGTCCACTGAGGCGCCCTTCACGGACTCACAGAACTCATCATCGTCACTGAGGATGTCTGTCTCCTTGATGTCATCYTGCTCCTCA
9677	1	85.5154	37	C	T	TGCAGGGTTCTCACTTCTCTGGGAAGCATCTAGAAAYAAGACCTCCCGCCCCTCCTGGCTGGGCTCTAGGGTGGGGCCCTCACTACCTCTTTTCTT
8783	1	85.5154	26	T	C	TGCAGGCAAGTCTGTAGGACATTTTYCTGAGTAACGATGGGTGTGGGTGGTCCTGGGTAGAATAAGAAAGCAGCTGAGCAAGTCATGAGGAATAAG
14964	1	86.053	16	C	T	TGCAGGGAGGCAGGGYACCAGGCACAACTGTATAGGCACATGGTGTGTCCTAAGAGGTGTCCCTAGTGCCAACTGCATGCTACTCCTAGCTTCCAC
2493	1	86.053	17	T	A	TGCAGGAAACTCTGCTWACCCCTGGGGTGCTGGTGTGCCTCTATTCCCTTTCCAAAGTCATTCCTGCCCCATCACAGAGCACACAGCATTTAGTAG
10040	1	86.053	91	C	G	TGCAGGCTCGCCTCTATTGCATTGCAGCTGCTGTGGTTGCCTTGACTTACCCTGTGTGTGGCTGTTTGCTGTGCCTAGGAGTAAAGGAGCSGCTAG
11613	1	86.053	92	G	A	TGCAGGCTGTGCCTACTCATCCCCACCTACCTGGATGTAGCTCCCTTCATATTCAAAGAAAAGAAGTGGCCATGTAATGCTGATGAAGGACRGAAA
13199	1	86.053	45	G	A	TGCAGGAGCATGTCCTGCGTTTGTGAAGAAAACTTGGGGAGGAGRCACTGCTCTGCACCTGCCCTGGGGAGCCAATCCCACAGCAGGGTAAAGGTG
15151	1	86.5795	28	C	T	TGCAGGACCAGCTTGTTTGATTCACCTYGCCCCTGGTGCTTAGCATCGGGCGGGTACACATAGAGCTAGTGTTGAAAGGTTTGGAGGTTCGGAAGA
14221	1	89.3393	88	A	G	TGCAGGTCAGGGTCTTCACCTGTAACAAATGATCACAAATTCAGCGGCTTAAAGCAACACCATTATTATCTGTTGGTAGTTCACTCTRACTGAGCT
3133	1	89.3393	16	G	C	TGCAGGACAGGGCCASAGCCAGGCACAAGTCCTACCTACAAGAGACCTCAGAAGCCCTCTGCCCCAAGCTCTACCTTAATGTTGCTGCTTTCTCCC
16434	1	89.3393	67	C	A	TGCAGGTGAGTGGGTGAACAAAAGTGACAAGTGTGTACGGTGGAACACTACTCAGCAGTTCAAGGAMCTGGTAAATCATCGACACATGCGAGACGA
8087	1	89.3393	31	G	A	TGCAGGTGACAGGTATCAAGACAGAATGGARAGGGTCAAGAGGGGAAATTCCTAGGCACCCAATCAGAAGCACACCAGCATCTTACATTCCCTTCT
7014	1	89.3393	39	G	A	TGCAGGGAGAGAGCATTATTTGGGCCTTTTCTTGCAGARTAAACTCCCACTTCCCCAGTCAGCACTGGCATTATCAGCCAGCAGTCAACCGAAGCC
12653	1	89.3393	80	T	C	TGCAGGCCTGAAGGGGGCACCAGATCTTATTACAGATGGCTGGGAGCCAGCATGTGGTTGCTGGGAATTGAACTCAAGAYCTCTGGAAGAGCAGCC
4305	1	89.3393	72	C	T	TGCAGGGCTGTGATGACCAGTGTGATCCGTCACACTGGGGAGGGCCCTGCTCCTACATGCTTTCCAACTGCYCTGGCTCAAGAGCAGCAACCTTCT
7835	1	96.8267	87	T	G	TGCAGGATCCAAGTCTTTGACACTACCCCTATGCTCAAGTAGGCACCGTCAGCGTCCTAACCTTTACTAAGATGTGCCTTGTCCCCKCCACAAGGC
13381	1	96.8267	70	G	T	TGCAGGGGCCACATGGCATAGTCCAGTGACATCCAGAGATACACAGAAGAAGACCTGCCTTGGCCCTCAKTCTGCTGTAACAAAGCATCCTAAGCT
15566	1	99.0163	36	C	T	TGCAGGCAGCTCAACAGGTTGGTGAGTGTCCTCTCYACGTAGTTTAGTGTGTCTGAACCTCTATTCAGCATCCCGCCTGGTTTGAGCATCTCTCAG
6861	1	99.0163	93	T	G	TGCAGGATTTTTAAGAGGTATCCAGGCAAAGAGACAGGAGAAGTGAAGATGACTTTAAGCGAGACACACATAAACCCTAAAAGCAGAAGGCAKCGT
3501	1	101.204	67	T	C	TGCAGGTACTTGGATGAAATAAGCCTCCTTCCAACTCAGGCACTGCTCCAAGTCCCACCCCAGACAYGGACACGCTCACACATAAACACACACAAA
7340	1	101.204	30	G	A	TGCAGGAGTCTGGTGTTTTTCTCATTATARTCCACACCTGTGCAGACACCAAAGCCCAGCACATGGGCTTGTTAAACTCTGATTGCCACTGCTTCT
8760	1	101.734	30	G	A	TGCAGGTCTGTGGCCTCAGTGGACCCTGARGGAGCTGTGAGGCATCAAAGGCCATCAGGGTTGTTAGGGATTGGGAAGTGGAGATGGGGAGGTGTG
12043	1	103.92	87	T	A	TGCAGGGTTGACACACCCACCCAGAACTAACCAGCCAGGGGTGCAGCTGGGTGGCTGTGGGGACAACCCAGGCCTGAGACCCTTGCWGTACACACA
8634	1	107.821	39	G	A	TGCAGGGGTTTAAGGTCCAGCTCAAAGTGCTCACTGGGRCTGAGCTCGTAGGTCTGCACTGAGTTGGCGCCAACGTCGGGGTCCTGTGCGCTCTCT
15195	1	107.821	27	G	A	TGCAGGAGCAGAGTGCATTTTCCCGCRAGACCTCCCCCATCCGTGGCCTTAATATCCACTTCATAAGAGGGAATTGTTTCAAAATCTACCTCTTTT
4599	1	108.359	61	T	C	TGCAGGAGGTAAATACCACTGGCAGGTGTGAACTCCATCTGCACTGCCTCACTGTAGAGCYTACTCTCTTACCTGCTTGTTCTGCATTGCCTTCTC
6731	1	108.359	69	G	A	TGCAGGCAGCGGGAGCGAGGAGCCGAAGGGAAAAACAGAAGTGGCCGCCGCCTCTTCCAAGTCGAAGGRGAGGCACGGCCACGAGTGGTTCGAGAC
28	1	109.996	70	C	T	TGCAGGATTCCTGTGCCATTGCCTGGATTATCCATAGTCATAAGACAACATAGAAGGAGATAATAAAGGYGACGGCACTGAGATTTAAATAGAAGT
5677	1	110.535	14	T	C	TGCAGGTCCATCCYGTTTCCCATATATCTCATCGTTTTATGTTTCTTTACAGCTGAATAAAATTTCGCTGTGAACGTATACCATACTTTATTTGTT
11004	1	115.652	12	T	G	TGCAGGATTGAKTGTTTTAATCTCCAAGAAAAGGATTACACAACGGACAGGTGGAGAGTTATATTAACAGAAAGCATCTTCCAGGTGAAAATGTTA
5201	1	115.652	87	T	C	TGCAGGCTTGAGCCAGTCACCATTATGGAACCATGGGCATAAACCTAAAATATGTTCTATACTACTACATAAACTCTTGTCAGCCAYGTCCTTTGG
16279	1	120.127	56	A	C	TGCAGGAGAAGACTGGTGGTACATGGGGAAACGGTGTGAGAAGAGAGGGTCCACCMAAGACACCATTGTCATTGCTGTTTCTTCCACTGTCACCGT
6812	1	124.622	22	C	A	TGCAGGCCACAGAGTTTGTAGMTGGGAGGTTCTGATGGTAACTTTTCTCCTCTGGCAGTGTGCAGAATGCCTTGCAGTACCATGAATGCTGGTCAG
11559	1	125.14	62	C	T	TGCAGGGGGGAGCTGAGAATACCCACCCTGTGTCGGTTAAAAGACGACTAAATTCTGCCAAYTCAGATTTTACCTCTTCTCTCAAAGTGGAGAGCC
343	1	125.14	36	T	A	TGCAGGAGTCCCGAGTCCCCTCCTCCAGTGAAGACWCGGCGCCTTTGGAAGCCGATTGAATTCACAGGGCCACAGCTCAGCACGAACCGCATTTCA
6500	1	127.329	52	G	A	TGCAGGCTGGCCCGAAGCATGGATCCCCCCTGCTGCAGAGCATGCGGCTGCRGGGCTGCCCACAGACTGTAAGCACAAGGGTCACACTTGGTGAGC
2608	1	128.963	25	C	T	TGCAGGTTAAAAAGCCTTGTCTAAYGGGCAGGACACCCATGACAGTGCCCTTTTCTGGAGGAGGGCACGCTGGTGGAGCCCTGGCCCTCCTGCCCC
7176	1	129.495	32	T	C	TGCAGGCTGTTCTGTTTACCCAGGATGGCCAYCAAAGGAAGTGTGAGCAAGGCCGCCAGTCAGGGTGGGTGTGGGGAAGGGATGGGAGGTATGGAG
8081	1	129.495	25	G	A	TGCAGGGCTCTGGCTGAGAACATGRCCAATGACATCGATGAACTCATCGGCATCCCTTTCCCCAACCACAGCAGCGAGGTGCTGTGCAGCCTCAAT
12092	1	132.245	25	C	A	TGCAGGGCCCCACAGCTGGACAGGMCTGACCCATCCCATGCCGCCATCCCCTGCTGAGATGGGCATCTGATGCTGCCAGGTGTTTGCAGACAGTGA
16298	1	132.245	78	A	G	TGCAGGGTCAGACCAGGGAGGGGGACCCTGTTCCACATGGATAATACTGTCAACACAGGCTGAACTCTGTGTTTGCTRAGCCATATAAAACTCAGC
10854	1	133.877	49	G	C	TGCAGGATGTTTTCAGTGAGACCAAGGGCCACGGTTCCAGCCAGGATGSAGAAGAGAAACCCCTGGCCACCAGTTGCTGGTGACGGCTGCTGAAAG
13588	1	133.877	88	T	C	TGCAGGTGCTGGTGGACCTGGCTATCCTGGGGCAGGCCTACGCCTTTGCTCACCACCCCCAGAAGCCAGCACCCCATGCAGTGCACCYTGTCAGTA
15562	1	133.877	40	C	T	TGCAGGAGCCTACATGCTTTAAAAGCGATTTTACTGGTTYCCTTGAAGGGACACAAAGGGTCCTAACAGACGGTCTGGGGCATGCCATCCTTCTGG
3412	1	134.412	19	C	T	TGCAGGGCTCAGCACAGGYAGGCAGCCTAACAGAAGAAGGCTCTTGTGTTCTCCATGTGGTCTTTGAGTGGATGTGCCTCGTGTGCTGTGCTGTGT
3585	1	135.496	46	G	A	TGCAGGAAAAGGAGTGAGGGACTGATTGGAACAACACATCTCATCRTTGATTAATTCCCCTTAAATCTCCTCGCACTCTTCCAAGTAAAATCTGAG
12315	1	135.496	15	T	C	TGCAGGAAGCTATAYATAGCTTCCTCAGTATCAGAGGGTAGTGAGGTGTGAAGCGTATTGCAGGTTACAAGTGGGCACATATGTACGTGTGTTTGT
16433	1	137.203	40	C	T	TGCAGGGTGTGCGGGCAGTGGCCAGTCCCCCTCTCAGCCYTCTGCAATCTGGAGTCCAGGCCTCCACACCATCCCAGTGTCTGAGACTGAGAACAC
930	2	0	25	C	G	TGCAGGTGAGGGTAGGGGTGGACTSACTCTAGTCTCCTCTGTGGGCACCAGGCTCTCAGGGGGGCCAGTGGCCCCCACCCCGCAGACTGTGCTTCC
16091	2	4.7045	62	A	G	TGCAGGTACATGTCGGGGGCAGCCTGGCCGTCCTGGGAGGCAAGCTCTATGTCTCTGGGGGRTATGACAATACATTTGAACTCTCGGACGTGGTAG
3741	2	4.7045	83	T	C	TGCAGGAGACCCCAGGACAAGTGCCAGGAGAAGCAAGCAGGGTGTGCCAGACGGGAGGGAGGGCAGGTGGGCAGGTGCACCTYGCTGCAGATACTG
15250	2	4.7045	43	G	T	TGCAGGAAGCACCTCACCCCTCACCCCTCAGCACCTGACACGKCAACATTGCCATGGTTGTCCCTGAGAAACAATGAACCGCCACTGTATTCTTCC
2365	2	4.7045	51	T	C	TGCAGGTCCCCCAGGGCCAGGAGCAGTCAGAATTTACCCAGCAAAGACCTYCCTGAAGACAGGCCCTTCTTTGGACTGACAGGTTTAAGCCAGAAT
563	2	4.7045	69	T	C	TGCAGGGCTCATCTGGTGATGCTCAACACTAGACTTGCTTGGTCTGGTAAATTCTGGGCCATTTTCTCYGAAGCTAAAGCTGCTTAAAGGACGAGG
5728	2	5.24214	12	C	T	TGCAGGCTCTCYCCCACGGGTACCTCTAGAGAAATCAGAAAATGTTCCATGGCTCCTGGGCCTGGGCGACACCGTGCTCAGGAAATGCAACAGTCT
15055	2	5.24214	52	T	G	TGCAGGGTGTAAAAACATTTTCTTTCTGCTGTTAGCAGATTAGGTCAAATTKCATGAGTCCCACCAATGTCTGCCTCCTGAGCAGCCCAGGAGAAG
341	2	5.24214	12	T	G	TGCAGGGACTCKGTCACGGAGCCGATCTGGTTGACTTTGAGCAGCAGGCAGTTGCAGGACTTCTCACTGACAGCCTTGGCAATCCTCTTGGGGTTG
2275	2	5.77976	17	C	T	TGCAGGGCAGGTATGAYGAGGAGATTGAGGTGTACCGCCACCACCTGGAGCAGATGTACAAGCTGTGCCGCCCGTGCCAGGCAGCTGTTGAGTACT
16112	2	5.77976	50	T	G	TGCAGGACTGGGGGCGGGACTGGAGAGGCGCCTGCGAGATGGGGTTAGGKGTAGGGGACCAGTTGTTTTTCCTGTTATCTGTAGAAAGGAAACAAG
9188	2	6.86104	11	T	C	TGCAGGATGGYAGCGGCAAACTCACTAAAGTGGCCTGGAAGGTGTCCAGGGGTCATGGATGCCACCCATCTGGTGTCTGGGTACCCTCAGGACCGA
16041	2	6.86104	70	A	G	TGCAGGCCTCAAGAGGGACAGAAGTGAGCAGGTAGCTACTGAGCCTGCTTCCCACGAGTGTGGTTCCCTRGAGAAGAGCGACAAGAGCCGCAGACA
7588	2	7.39879	48	G	A	TGCAGGGTTTGGAAGCCTTCCTGCTGTTGGCCAAGTGTCAGGAAATGRAGCTTGCACATAGGAACACCATGCAAATGACCCAGGACCCCATCTCAG
7708	2	7.39879	54	G	A	TGCAGGCCAGAAGGGGGCACAAGATCTCATTATAGATGGTTGTGAGCCACCATRTGGTTGCTGGGAATTGAATTCAGGACCCCTGGAAGAACAGTC
10234	2	7.39879	48	A	C	TGCAGGAGCTGAAAGGACAGAGAAGTCCTCCTTTGAGTGGCCCACGCMCACGGGCCCTTCCCTTAGTTCTGCTTGTTTCTAGGAGAGTGAGCATCC
14649	2	7.39879	48	G	A	TGCAGGGGAGTCCATGTGGAAAGATGTCTTTGGATGTTGAAGGGTGCRTTGTGTGAGTTACAAATGCAGTCAGTGTCCAAGGGTGAGCCTTCAGTC
5028	2	11.2901	30	T	G	TGCAGGCTCAGCCTGTGTGCATGAAGGGAKTAAGGGAGAGGGAATTGAGGGTTGCAGGCCCAGGAACCAAGAACCCAGCCCCTGGCCTGACAGCCA
9341	2	11.2901	93	C	T	TGCAGGAGGACAAGATGATCTCTGCCACACAGCAGAGTGGCACACTCCTTGGCAGAACAAGCAGGCTACAGCCAGATCCAGACTGTGGTTCAYGGA
5961	2	11.8196	89	C	T	TGCAGGCTGTGGGCCAGGCTGCCCTTCTCCCTATAGGACAAGCAAGGAGAGGACAGGCTTTTCTGACCACATCCTCTGTTCTCCAGGAYGCTGCTT
2906	2	14.0145	51	A	G	TGCAGGGCCACTGGGCCACATTGGACATGATGCATAGGGACAGGAGTGAARGGAAGCATGCACTGAAATGTCCTTGAGATATTGGGGTGAGGGCCC
13745	2	14.0145	16	C	A	TGCAGGCACCAGAGAMTCCCAAACCCCTGTCCCTCAAGGACCACTTCATGCTTCAAGGAAGAGTTAGAGGCTGCAATGAGGGAAACAGTGTCTGAC
12447	2	14.0145	64	G	A	TGCAGGTCAGAAGAGGGCCCCAGATCTCATTACAGATGGTTGTGAGCCCCCATGCACCATGTGRATGCTGGGAATTGAACTCAGGACCTCTGGAAG
11097	2	15.0985	61	A	G	TGCAGGGCACAGGCCTCTGGTGACCTCCTGGGGATGTCACCCTATGGGAAAGAGGCCCTGRGCCAGGAGAACACAGCTGGGCTAGTTGGCTTAGCT
10120	2	15.6334	74	A	G	TGCAGGTCATCCTTCATGGAGGCTGCTACTTATGGGACAGTAAGAATGCTGTGTTGTTGGAAAAGATCTCTAARCCTGCCGTTCCCAATATGGTCC
13669	2	15.6334	26	A	G	TGCAGGGAAAAGTGTGGGCATTGAARCTAACATTCACAACCTTCCCCCATGCCCCAGTTTCCGCCCCTGTACAATAGAAGAATGGTCCCCCTAGCT
4769	2	15.6334	93	A	G	TGCAGGCTGGCGTGCCTCCCAGATCTGAACTCCTGGCCCCAGCTGCAGTGCTAACAGCCAGTGGCCAGCTTCAGGAATCTTCTAGCATAGAGRCTT
7448	2	17.8283	53	G	A	TGCAGGCTCCACTCCACCACAACCTACTGGGTGGAGATTTGGGGCAGTATCTRTACTGGCTTGGGGGTGGGGAGGGGAGTTAGCTTCCCCAAATCT
9143	2	18.3548	68	T	C	TGCAGGATGGGGGAGCAAGACGGGGAGTGGGCTCCTGAGGCCTGACATTTGCCTGCCGCCCCAGGTTYTCCCGTGCCTGTGAGAGCCTTGGAGCTG
10558	2	19.4389	16	C	T	TGCAGGTCCTAATACYACACCCACCTCCAAATTCCCAGCCGTGGGCACCCAAAGTCACACTGAAGCTCCTCCCTCTCTGAGTTCTCCAGGATTTCA
13709	2	19.4389	51	G	A	TGCAGGACCCACAGGCCCCATTCGAGAAACTGGGCACGCGATGGCCAGCGRCTGCATGCAGCAGGGGCACCCTGGGATGGTAGGGTAACCTGATCG
1181	2	19.9766	12	A	G	TGCAGGCATGGRGGCAGACCAGGGATGCGCTGGCAAGGCGGTAGTGCACCCGTGCCTTGCTCTTTGAGTGCCTTCCTGCGCCAGGCCTGAGCTCAG
11565	2	19.9766	24	T	C	TGCAGGTGAACAACCTCATCTTGYTCCAACTTCAAGACTACACCGCCTGTGGTGACCTGGAAGGTGTTCTGGGCATAGTCACAGAAGGTGAGTACC
5185	2	20.5196	46	C	T	TGCAGGGAAGGACATGACCATGAGCACTGTGCAAATGCGTCTTTGYTTTCTTCATTTTCACCTTTCTGGTAACTGTCACTTTCTTAGAGACTTTCT
10594	2	23.8701	39	T	C	TGCAGGCAGGAAAGACAACTGCCTACCAGGAACACACAYCTATTCCTGGGTAAACAGCAGCTGGGCCTTTCCACATGGAAGAGGACCAATGCGGTC
10719	2	23.8701	62	G	A	TGCAGGCCGTGGGGAACTGAATCTCTGACACTGATCTGATCAAAGTGTTAGCTTGAGTCAARCAAAGGTTAGAATCACTCTCCAAAGACACGATTC
7136	2	23.8701	43	C	T	TGCAGGCTCTCTACCTCTCAGTTGCTTGGTGGGAAGCAGGCAYGACCCTGGAAAGCTGATCCATGGAGGCTCCAAGATGCACCTATCGTGGTTCAG
4573	2	23.8701	32	T	C	TGCAGGCAGAGCTGGGAAAGCTGCTTGTAGAYCTTCCCTCAACCCCAGGAGGCAGGGTTAGCATCCTCATTCTGGGGCGCATGGGACTCGTCCAGG
438	2	23.8701	49	T	C	TGCAGGCTTCACGGCTGCATTTCCCCAGAGGATGAGGAAGATAGCTGGYACATAGGAGCAGGCTCACAAACAGTTAAGTCTGAGGTACTCGGGACA
8988	2	24.9516	16	T	C	TGCAGGATCTCGGCAYACACAGATGTGCACGGATTACCACACTTACGCTCAGACGTGTGTGCAGCTATGCTCACACATTTATATGCATCCAGCCCC
9493	2	24.9516	61	T	G	TGCAGGGCAGGACGGAGAGGACTCAGGCTCCACCTAGACTAGGAGAGGTGTGTGTGGGGGKGGGGCTCATTGTCACAACCTCACTGTGATCCCACT
14698	2	27.0141	72	T	C	TGCAGGTCGGGCTGAGGTTCCACCTGAGCCCGCCCTCATTCCGTCTGCGTTTCCGTCTGTGTTTGCGCGTGYTTGAAGGACTTCTGGGTCCTCTGT
3995	2	27.0141	21	G	T	TGCAGGACCCCATCTTTACTKAGTTTTCCCACCCCAGCACTCTCTGCTGCCCTCTTTCGTAAGCTTCCATGAAGCCAAGGTCTCCCACCAAAGCCC
675	2	29.0757	43	T	A	TGCAGGAGCTCCAGTCGGCCGCACATTATCCTGCCCTGGCGCWGGCTGCGCATCTGGTAGCCCTGGCATCGTGTGTGTAGCCTGTGGGCAGCGCTG
2698	2	31.2688	36	T	C	TGCAGGCCAATCTAGTGGGGATGCTTCTCAAGTGAYTCTAGCCTGTGTCAAGTTGACATGAAAGGTAGCCAGCAGAACTGGAGAGATGGCTCAGCA
11168	2	32.2657	26	A	T	TGCAGGTCGGGCACATGTATCGCTTWCATGTCATCTGCAGTGAGAACAGCAAGGCCCTGTTCTCAGTAAGAATGCACACCCTCACTGCCCCATGGC
12023	2	32.2657	49	A	G	TGCAGGAAGGCTCAGAGGTGTATTCCTTTGCCTGGGCACGCCCCTGCCRCCTGGGCCTCCAGAGGAAGGTAGAGCTGAAAGGGGTATGGTTAGGGA
816	2	35.5	34	G	A	TGCAGGCGTCATGCTGATACTTTCTCCAAAGAGRAGAGATGCTTCATGGAGCTGGGGTTCACCCCACCACTGGGGGTTCATTGCTTGTGATTAGGG
8788	2	35.5	34	G	A	TGCAGGGGACAACGGACAGAACACCAGAACATGRAGGGGGCACCACGGGACAGGGGACAAGCGAAGCCACGGAGACCTGGCTGGCAGGAAGGGAAG
4947	2	36.5818	60	A	G	TGCAGGGGCATTGTCTTAATTAGGATCGATGTGGGAGGGCTCAACCCACTGCAGGTGGTRCCATCCCTGCATAGGTTGTCCTGGGGTGCTGAGCAA
13835	2	36.5818	18	T	C	TGCAGGCACAGAGAGCGYGCATTGTTCCACTGCACCTGGACAGTGCCTGTGTCAGCAGGCAGAGTAGGGAATGGCGCCAGGCTGGGGAGGGTCTGA
13766	2	42.2645	91	C	T	TGCAGGGGCTGACTCCAGCTCAAAGAGATCATGTCACCACGTAGAGGAGACTGAGAAACTGCTCTGTATCCATTCCTAGTTTTTAAGTTTYCTTCT
4636	2	43.3196	54	C	G	TGCAGGTTTCTAACATGCCCACCACCAAGCTGCCACTTCTCAGGTGAGGGTGASCTACAGTTCTTCCAAGAGCCTGGCAACATCCATTAAAACCCT
6997	2	44.9589	18	C	T	TGCAGGAAGTACCACACYTCCCCATGCGGAAGACAGCAGCCTCCGTCAAAGGCAGCGGCTTCTTAAAGAGTTTGCACAGTGCTGGACGCCATCGGA
5910	2	45.5007	28	A	G	TGCAGGGTTCCCCTGCTCTAGTCTGTGRTGATCAGCACTGTCCCAGAAGAGTGTGTCCTCCTCCCCAGCCACAGGGCCAGAGTCTGCTCTCTCTAC
6213	2	46.0481	12	G	C	TGCAGGCTGTGSAACAGGGAAGGGATCACATGCCAGGGCAGAGGCCTGTCCTTGGCGAGGAGGAAGGCCTCTTCTGGATCTTCTGAAGCAGCCTGG
8946	2	46.0481	41	T	C	TGCAGGCCCGACACAATCTGTGGGGGAAATGTAGTCAGACYCCCTTATCCCAAACCCTCCAGATTAGGGAGAAGGCTCTGCAGTCAAAGAGAGAGC
4325	2	46.5889	28	C	T	TGCAGGTCAGAGGCAAATCTCCACAGAYCCCCCACCCATGCCATGCTTTATAGAGAGATGAGGTGAGGAGGCCCTCCTGGGGCTCCTTACCTGGGG
9633	2	47.134	61	C	T	TGCAGGGGAATCGCAGATCTCCACAATATCCTTGATCCCATGAGAATTTTAAGAAGGGATYAGAGGAAGAGTGGTCGGAATTGAGCGTGAAGTGAG
12677	2	48.7814	65	T	A	TGCAGGGCCTTGGAAGGACCCGACAATCCACTGGGTCTGATAAGCTGCCAAGAAAGGCTATTCGWACCTGAGCCCAGACAGTGAGAAGTGAGAAAG
4650	2	49.3126	81	A	G	TGCAGGGCTGGGTGGAATCTGGGGATCCCTGCACCTCTCATTATCTTCCCCTCCACAGGCTGTGGCCCCTTCTGCTGCTCRCGCAGGGGGGCCTGC
9798	2	50.0146	49	T	C	TGCAGGACTACATCCTGCCTCTGCACAAGCCACACTCCTGCTCAGGGAYTGCCAGAGGTTGGCTCAGTAAACACACACAAAGCACACGCCCAGGGG
3056	2	52.7268	26	A	T	TGCAGGCAAGCAAGCCTGTGGGGCCWTTGTTGGAGGACCCAGCCCACTGTGGGAGATAGCACACCTGGGCAGGTGGTCCTGAGCTGTATAGGAAAG
7726	2	54.3553	61	T	C	TGCAGGACTATTAGAAGGGTCTTACGTACCTGGGGCGAACCTTGTGTGTAACCAGAAAATYCAGTGCCTGGAGCACAGCCTTCAAAGTCTCCATGT
11782	2	54.3553	12	T	C	TGCAGGGTTCAYAGAAACACAACACATGTGCTACTCCCCCTCCATGTCTATTGCAGCCATCACTAATCTATCAACTACTCCTTCCTACTCCACACT
14134	2	60.599	44	T	G	TGCAGGCTGCCTGGTCCCGCTGCCATGCATGCCACAATAACATKCAGAGACTCTGTATTTGATACAATCCTGTTGGCCAGTTACTATTATTGTTTA
15800	2	70.6589	44	G	A	TGCAGGGGTCACAGTCTCAGAAAGTGGAGGGCAGGCCCTTCACRGGACCAGCCCACACAGGTATTGGTATTCCTATATCCCTGTGTGGCTCTGAAA
7089	2	70.6589	26	G	A	TGCAGGGTACCAATGACAAACCAATRTAATGATTCCATTTAATTAGCTTAGTGATCGAGTTTATTTTACTTAACAGGGTTGTAGGTGACCCCATGT
2917	2	70.6589	56	G	A	TGCAGGTACTTCAGTAAAAGAGTGAACATTTGCTGGATGGATGAAATGATGTCTCRGGCTAGTAAGCATTCCTTCATTTCATTGAGTGGAAACCCA
5151	2	71.1965	35	T	C	TGCAGGCAAGCTAGAGGCTGTGGGTAGAATGGCCYAGAAGGACACATTTCCAAGTCAAGGAAGGTTGTGGGTGGACAGCCTCATGCAAAGAGGATG
11478	2	71.1965	57	C	T	TGCAGGGTAATTTTGTTTGATTAGTGTTCATCTGTTTCAGGAAGTCGTAACCTCTGYGCTTTACACCACACCAGCCTGCGCCATCACTGGCTTCAA
788	2	71.1965	55	G	A	TGCAGGTGTTCATTTGGAGATTTTACAGGTCACTCGGAGACCCTTTCCAGCCCTRAGACTCGTGTTCTACACAGCACAATCTACACACATTTGAAC
10982	2	72.2804	36	C	T	TGCAGGCCTGCCACAGATCTGAGGTGTCAGGTGAGYGAGGTTTAGACCACCATGGTCCTGGTGATCTGCTGCAGCGAGACAAGAAGCCGACGTCCT
539	2	72.8154	18	G	A	TGCAGGGACCAAAGGGARAGGAGAGTCACTTTAAATACTGTTGTCGCATCTGGCTTGCATCAGTCCCAGCTCTTCCTCTGACACCCCAGAACCTAC
6635	2	73.353	18	A	C	TGCAGGCACACTCTGCCMATCATCACATGTTGGAAGCCAGCATGGCATCTGAGCCTTCGTATTCAGAGTTGGCTTCTTTCCAGCCTACGGGAAATG
5054	2	73.353	19	T	A	TGCAGGAGCACTCCCATCWCTAATATGCCAAAGCCCATTGTTAGTGGCCCATCTGGTTTGAGCCAGATCCCCTCCCTGAGCTGTTCTCAGCCTGGG
4314	2	73.353	25	C	T	TGCAGGGAGGCCAGGATATGACACYTGCTCCAAGACCCCCAAGACTAACAGGACTTTCTGTCCAACCCACCCTCAGGGTTCACCAGCTTCAGCCAC
14199	2	73.8852	21	G	A	TGCAGGGACCTTAGGGCAGGRGTAGAGCAAGGGGAGTGTCTGGGATCCGCAATGCTCTGTACATCGTGTTACCGTAAAGTGCATCCAGAGCCTGCC
11979	2	75.5216	40	C	T	TGCAGGCATGGAGTGATTTCAGTTTCTTTTGAAAGTAAAYCAGAAGACAGACTCAAAGTAATACCCTTCCTGTTCCTTTCTGCTTTCCCCAGTGAG
10770	2	75.5216	20	C	G	TGCAGGTAAGCTGATGGGGSTTGTTCACAAATTCCATGTGGAACCCAGTGTATGCTCGGGCACTTGGAGTTCTCAGAGAAGAGGTGGGAGGGACAG
5284	2	76.0593	28	C	T	TGCAGGCCGCGGCGTCCCCTCGCCTTTYGAGATCTGAGCTCTGCCTAGAGAGCTGGGCGGACGCGAGCGGTCAAGCCCTTTGGGACGCGGAGGTGT
13312	2	76.0593	26	T	C	TGCAGGGATGCATTCTGGAATGCTAYGATCAAGATGTCACTTGTGCTATTAGAAAACATGGTGGCATTCAGTTTCCAAAGAGCATCCAAATTCTTG
7690	2	76.794	45	A	T	TGCAGGCATAGAGGGGCTCCCTCCTAGTTTCATCAGCAGTGGGTWCATACTTCACAGCTGCATCTGACCTTAAGTAGAGAGGCGCTCTCCTGATCT
10531	2	78.4367	25	T	C	TGCAGGGTTTTTGTTACAGATAGTYATGTTTGTTTGGAAAGGAAGTTAATTTTTCTTGGAAATTCTTCAACTAAGAACACAGCTAGAATTCAGAGC
1880	2	78.6271	28	C	T	TGCAGGCCCTTAAGACCCAGCCCTCATYACAGAACACAAGTCCTCTGCTGCAAGGGTTGGGGACCAAGGAATTCCATCAACTGCACCCTTAGCCTG
4932	2	79.1665	62	T	A	TGCAGGCCAGAGCACTGGCAGGACCACAGCTGCAGGCTTGCAGAAGGGACCTGGCTTTCTCWGACTTGTCAGCGTGCAAGAATTTTTGCTTCTTCG
4148	2	79.1665	19	C	A	TGCAGGAGCCCCACAGTGMGTCCTGGTAGCCAGGACACATTTCTTAGAATCAGCCAGGCGCCCTTGGTTCCCGCAGCTCCCACTGGCGTCACCCTC
1070	2	79.1665	83	G	A	TGCAGGTTGTGGAGAAGTGGAAGAAGTTGGGTTGTGGCCACCAAGTCCCCTGCTTGTTGACCTTAGGAGGCACCTGAGGAGCRTGAGTCACGGGAG
10517	2	79.1665	90	C	T	TGCAGGCAAGCTGGGCTGCAGCAACAGATTGGAGGCCAGTGTCACTGTTGTCCCAATTTCTTCTCCTTCTGGAAGCTGAAGCTTGTACGYCTGTTC
6611	2	79.1665	26	T	C	TGCAGGCTGTCCTTTTGTCCCTTGTYCTCAGCATCCTATTGGTGATATGAAAACAGGTGTCAGAGCAGGAAAACCTGTATCCAGAGGAGAAAGCAG
3432	2	79.1665	34	T	C	TGCAGGCATGTTGTGTTCACTTCATGCCACCAGYGCTGTTTGTTATGTGCATATCCACTGTCTAGTATTTTAAAGATAATGATCTGTCAGTCCTCA
2392	2	80.2476	13	C	T	TGCAGGGTGTAGYTTGTGTGGCAGGGAGTGGCAGGGCCTCCCAGTAGTGACCAGCTTTTAGCCTTTATTATATTCCTAATGGCTTGGTCTCCCTCC
14219	2	80.2476	22	C	G	TGCAGGATGGAGGGAAGCCTCSCTGAAAACCCAGGGGACAGGGCTCACAGGAAGGCAGAGGAGCCAATGACTAGAATGGACAGAGTTCCTGAGGAC
10645	2	80.2476	27	A	C	TGCAGGGGCGGCAGCAGTCATCGACAMAGCAATTGCAGGAATGATGGCAGCAGTAATATCAAAGTCCCTTCTTAGCAGTAGAGGATAATTCTCCCC
4223	2	80.7852	67	C	T	TGCAGGATTGGCTTCAGCTTGGGAAACTTTTCCCACCCTGTCCCCCTTAAGAGCATCTGCATTGCGYGGCCAGGAAGTGGCCTGGGTTATTACCCA
6156	2	80.7852	72	G	A	TGCAGGGGTCAGACAAGCCGTGGGGCTCAACTCAGGGATGCCAAGCGCGAGCACCTAACACTGTCCAACCTRGCCCCTCTCAACTTCGGGTTAGGT
1316	2	80.7852	92	G	A	TGCAGGAGGTGCCAGTGCGGGTATCCCCACAGGGCCAAAGAAACAGCACCAGGCTCTTGGGTGGTGCCCAGGAGCTGACACCCAGCTTTGTRTGTG
2947	2	80.7852	19	G	A	TGCAGGTCACCTCACTGTRAGTGTGGCTGGGTGTTCCAGGGCTGGGCACCGCATGTACCACTCAGGTAATGACCATCATAGTCTGCTAAGGCCCCA
14276	2	80.7852	80	G	A	TGCAGGGTTGGGTGTGGTCATACATCCTGGATGCTGGGAAAGGGCGGGGACTTTGGGTCTGCATGAGGAAGACCCAAGCRTGCCTGAGGGCCCTTC
2008	2	80.7852	13	T	C	TGCAGGGACTGGYCCCATTCTGGACTGTCAGATCCTCCTGACTACCTTGGAAACGCCTTCTTCTCCAGCCCTTATCATCCAGGGACAGGGTTCGCT
9381	2	80.7852	23	C	T	TGCAGGACCTGACCTTCGTTCAYCTGGGGAACCCAGACTATATCGATGGGAAAGTGAACTTCTCCAAGCGGTGGCAGCAGTTCAACATCTTGGACA
11433	2	80.7852	21	A	T	TGCAGGCCAAAAGAGGGCACWCGTTGAACTCAGGACCTGTGGAAGAGCAATCAGTGCTCTTAGACCCTGAGCCATGGCTCCAGCCCATGATGTCAT
12866	2	81.3201	54	C	T	TGCAGGATGCCAGCCCAGAACACCACCTGTGTGGATGAGCTCGGGTTCTGTTGYGGGCTCCCCAAAGAACAGTTGTCCCCCACTGAGCGCAGAGAT
16067	2	82.4041	49	C	T	TGCAGGCTGGGTCCTTGACCCCCATTGCTGGGCCTCTGCTAAAGAGGCYTCAGCTGGAAAGTGCCAGGCCCTTGCTATATCCACCTATTGGTGCGG
10091	2	82.4041	86	A	G	TGCAGGGTTAGAAGGCACACATTGATGGACTGGTCTGGGAAAGGTGACTGTTCTCACAGGCACTCAAGCAGTGGTGGTTGGTCATRTCTGTGCTTG
13252	2	82.4041	32	T	A	TGCAGGATGTTTCCTCAGGGATAGTCAGGTCWAGCTCTAGCCAAGGCCTCTAGCCAAGGTCTGGTATTAGGGGCCAAAGGCTGGGCTGATACTCCG
7078	2	82.9417	16	G	T	TGCAGGTAGCAGCAGKCTCGGCCCCTGCAGACGCCTTTCCTCCCCTGGGACAGAGGCTTTCTTTTGAAGAGCGGTGTTAAAACTGAAATATTCTCC
14950	2	83.4652	26	T	C	TGCAGGGTATGTATGTATTTATTGCYTTGTTCTCAGCTTATTTTCGGGCCTGCCTGTGGCTTCCAAAGCTGCCTTGACATAGCAAAAAGATGACTG
11642	2	86.8117	42	G	C	TGCAGGCGCAGCCGCGCCTCTGCCTCTTGCCGCGACCTATCSGTGGGTAGTCGGTCCACGTAGTAGCGGCGGAGGCCCAGGCTCCTGCCCAGGCCA
7634	2	87.3352	33	G	A	TGCAGGCGAATCTTCACAATCTCCAGCGGGTTRGTAAAGATGACCTGGGAGCCTCCAGCCTGCAAGCAAGGGAGACAGACAAGCTCTTCCCACATC
15290	2	87.3352	85	C	A	TGCAGGGTGGGCATTTAACACTTGTCACGTGACTGCGGGCGACGTCACCTAGCAACAGCCAATCAGAAGGAATGGGCCGCGGGGMGCCGCGAGTCC
13472	2	87.8728	45	A	C	TGCAGGAATTTGGAGAGCTTTCATTTCTTAGTAGATAGACCTTGMTAGAACTTCAGGAGGGAGTCAGGTTGGAGCGTGCAGGCAGAGTCCTTGACA
10031	2	87.8728	77	C	A	TGCAGGCTCCCAAGCCCCTCCATGATGTTTCCCTGATAGAAGCTTGGGTGCAGTGTTTCCAAGCAAAATTAAAGCTMGGCTGAGAAGAACACATTG
11243	2	90.0677	26	T	G	TGCAGGAGGAAGTTTCTCTGATGATKCCTGAGCAAGGTACTTAACTATGAGAATAGTAGAATGCCATTAGGTATCAGAACATGGTCAAAAGAAGGA
2832	2	90.597	66	G	C	TGCAGGGGCAGGGATGGTCAAGGTCGAGAGCTGAGGCAGGGGGCGCTCACCCAGTCAAAGTCACASGGGTTGCCATCTTCGCGCTGCGTGGGGAGA
7447	2	91.1347	11	A	G	TGCAGGAATTRTTTCTTCCACCATATGGGCCCCAGGAATAAAATGCAGGTTGTCTGGCTTGACAATAGGCACCCTTGCTTACTGACCCATCTTACT
16568	2	91.1347	31	G	A	TGCAGGATGTGTGTTTGGGGTTTTGTGACARCGTGAATGAGGGGTGCTAAGTGAGGTCCTCTGAGTTCAGTTTCCACTCTTTGGGGCCTAACGTCA
6288	2	91.1347	42	C	T	TGCAGGACAAGTTGGGGATGGGTGGAATAAGGGGCAGGGTGYCCTGCCTTCACCGACATGGAATAAGCCGCTGGCCTAAGAACAACCCAGAGCCCA
15657	2	91.1347	84	C	A	TGCAGGGCAACCCTTAGTGAAGCCAGATTAGCTGAATGGGGGAGGGGCTTGTGTCCTGTTTAACACAGACTCGCCCAGCGAGGMTTGATGACTACC
10186	2	91.1347	42	C	A	TGCAGGAGACAGTGTCCTACGTTCCCTCTCTAAAGTTGGAGMCAAGGCCAAGTTCACATCAGCCAGCTCTGGAGCCTCCTCTGACCTCTGGGGAAT
15910	2	91.1347	20	G	A	TGCAGGGGGGTGGGTAGGCRTATGGCCATAGACACACCCCTGAGCTCCTTCCAGCTCTGGCAGAGGATTTGCATGGCTGGGGAGGAAAGAGAAAAC
3257	2	92.771	77	A	G	TGCAGGGAATGAGTCTACTCCCTGGGCCTGTCAAGAAAAGCTTGGAAGGACATTTCCTCTAATTGCTTTTCTAAAARGAGTATCTGGTATGTAAAC
7523	2	93.2832	90	C	T	TGCAGGCTAGCTAGTGCTTCTCACGACTAGGGCTCCTTAGGGAAATTCCACCCACAGTTCAAACATTCAGCCTAACACAACATCGAACGYAGGGTC
13566	2	97.7995	42	C	T	TGCAGGAGGGCCCCACCTACCTCTCTCAAAGACACCACCTCYGCATGCCTATTTCTTGGACACAAGGCTCATTCTGTAGCCCAGGCTTGCCTAACA
3171	2	98.3171	13	C	A	TGCAGGGTGCGTMTAAGGTCCTAACTGGGCGTCTCTTGTTTTCCTTGTAGCTGATTAGTGGTGAATTCATTGGAGCACTGGCCATGAGCGAGCCCA
6203	2	98.3171	30	G	C	TGCAGGGTTGCAGTTTGAGCTCTCTGCAASTACCCCTTTCTAGTGCTGAGGCTTCAGACCCAGATCCTCCCTCCCCAGATGAAAATGTTAGTCTTT
6278	2	99.3983	75	G	C	TGCAGGAACTCGAGAGAAACCGAGAGGAGATGAGGGATTTCTTTGAAATTCTCCACCAGTGCTCAGAAGAGTCASTCTCTTGGTGCTGGCTCCTCG
10567	2	99.3983	27	G	A	TGCAGGAAAGAAGCACAGCTGTCACCRCCCAGTCTAGACACACAGCCATCAGGTAAACCTCCCGTGTGGGTCTCCTGTCCCAGTTGTCACCTTCTG
6163	2	99.9331	33	C	T	TGCAGGGTCCTCTTCTCAGCTCCACTCTTAACYCCACCCCATCCCAGTACTGGGAGTGCCAACTGGGTGGGGTCCTCCCTGTTGACTGATGTATGC
14140	2	101.006	62	T	G	TGCAGGCTGTTTCAGCCCATCCCGACTTTTGTGGGTTACAATGACCAGTGGCTTCTGAAATKAACATTGTGGGCCGAGTAAACTCTGCACCCACTT
2225	2	104.31	86	T	C	TGCAGGCCATCCTAGGTGTCTCCTGCCAGCATTGTCCTAAAATATATTGATTTGGAGTCTAGGGTTTGTAGTCTTCCATGGACAAYGCCCTCTACC
12435	2	112.495	54	C	A	TGCAGGCAGTGTCAGTAGTGAGTGCACTCTCATGACATAGGTCTCAGGCTAGAMCAGTCATCGATTGGCCACTCCCACAATCTCTGTGTCACCCTT
10588	2	112.991	59	G	A	TGCAGGCCAGAAGAGGGCACCAAATCTTATTACAGATGGTTGTGAGCCACTGGTGGCTRGGTGTTGAACTCAGGACCTCTGGAAGAGCAGTCAGTG
10751	2	114.075	15	A	G	TGCAGGCTATCTGCRGAATTGAGCACAGAATCTGGCAGCGGAATGCAGTGGCGCACCATGGCCCCATAGAGCCCGTACTCGGCCATCACGCTGCTG
8201	2	114.075	47	C	A	TGCAGGACAGGGTTACCTGTCCATCATGGGGAGAGTGGGGATAGCCMATGGAAGAATACTGGCCGTCTCTGTGGCTGCCTGCACAGTATCTGCCAA
15325	2	115.159	48	T	G	TGCAGGTTGCTCCTGTTAGCTTGCTATGGGGAGGGAAGGGGGATTTTKGCTTCTATAACCCAGGTTGTAGTCCATCGCTGAGGGAAGTAAGATCGG
5594	2	115.694	23	T	G	TGCAGGCCTCTGTTACCAGCGGKTTTTCCCGCCAGCCTGGTCCCACAGCCATGCCAGCCCCAAATAATACAGAGATGCTGTGTTAGATATAATGTT
5225	2	115.694	25	G	C	TGCAGGCACAGCAGAATGACCCGASTCAGCTGCTTCCTCCCTCACAATTACTAAAAGCAGTCCACCATTGGGTGCGGGTCTTTTGCCCTCAACCCT
5955	2	115.694	78	G	A	TGCAGGCCAGAAGAGCACATCAGATGTTATTATAAATGATTGTGAACCAATCTGTGGTTGCTGGAAATTAAACTCAGRACCTCTGGAAGAGCGACC
5424	2	116.476	62	G	A	TGCAGGCATACATGCAGGCAGAATGGTGTACATAACAAATAAATACATCTTTAAAAAATTCRTTTTGATATTTTCTAATTGCCTAATTAACTCTGT
2285	2	119.323	81	A	C	TGCAGGAGGAAGGGAACCAGGAGGCAGAGAGAGGTTTATAACCTGGCTCGGGGCTGTTCTGAGCCTTGCCCCTTGTCAGGMAGTGACTAGATGAAG
9062	2	120.181	49	C	T	TGCAGGAAAGGGGATTTCAGCAGCGGTACTCTCTGGTGTGATCTGCGCYAACGGTCCCCCATCTGGAGATTCCTGCCCTTTGCTCCTCTGACAGGC
13288	2	121.267	12	T	A	TGCAGGCGCCAWGCACGGAGGAGCATACCAGCCCCAGCGCTGCGCTCAGCCCACCAGCCAGTACCCAGCTCCAGCCCCTCACTGTTCTCTATCAAA
8340	2	121.784	38	C	T	TGCAGGCTCCTGCCCAGCTCTGGCTCACTACCTCCTCYTCTTCCTCTTCGCCATCTCTGTCAATAATCTGCAGCAGCCTTTTTTTATCATCGTCTG
9689	2	125.735	27	A	T	TGCAGGGAAGTCATCCTCCACCTGAGWCACATTACTTAAAGTATCTGCAGAGCTTAGGAAGGGAAGAAAAAAGAGACAGAAAATACAGGGCAAGCA
15565	2	126.279	19	T	A	TGCAGGACACAGATGACAWGCCCTGACTTGAGCCTCCAGTGGCTCTCAGACACCTGTCAGCAGAGGGAAAGCCCCCTTGGCCTTGATGTCCTTCAA
8475	2	126.279	65	C	T	TGCAGGTCTGTGAGTAGTCCCAGCAGCAGATGGGTGAAGTAGAGGCACCTCCTAGCTTTGGCTAYGTCTTGACCCTGGAATCATCAGACCCCTAGA
11153	2	126.279	65	G	T	TGCAGGTGCGGCTGGTGATCGCAGAGAAGGGCCTGGTCTGCGAGGAGAGGGATGTGAGCCAGCCKCAGAGCGAGCACAAGGAACCCTGGTTCATGC
1439	2	127.354	65	G	A	TGCAGGCCCTAGGGAGGGCCACAGGAAGGCAGCTACCCAGGCCTCGGGAGCCTCTAGATCTTACRCTCACAGCTCGGCAACCCTCCCTTTGTACCT
6670	2	129.552	51	T	C	TGCAGGATCTCGCAGAGCATCTTGGTGAGCTCAATGGCACTGCGTCCGAAYGGACACTCGTGTTTGTCCTCTCGGCTACTGTTCTCCAACACGATC
8657	2	130.631	49	T	C	TGCAGGCATTTGTAGATTCTTGCTGGCTGGGCATCCATCTCTGGTCCCYAAGCCCAAGCTTGCCCCAGAAGGATCTTTCACAGACAGCCGAGTGCC
13012	2	131.165	26	T	G	TGCAGGGAAGCTTTAGGGGTTGATAKAATGTCTGGGCAGGTGTGGGGGTGTAGGAGGAGCTGGTGGACATGTGTGGGGGTGTGGGAGGGGCTGGTG
12964	2	131.165	67	T	C	TGCAGGCCCTGCCAGCCTCAGCATCCGCCCTCTGGGGACTGACGTCTTCTCTCCACGGAGCCATTTYTTGGCCCTTTGCAGTTTGTACCAACGCCA
15760	2	131.703	19	G	T	TGCAGGGAAGGCAGCCTGKAGTCAAGCAAATAGTGCATCCTGAGGGCAAAGGGCTTGAGTGGCTTGCGGCTCTCCCAAGGGTGCGATGTTTGGAGG
15142	2	131.703	61	G	A	TGCAGGGAAGGGCCTTTTGTTCCTGGCATGTGACAGATGAGCAGGCATGCCACAGGTGGARACCCTATTCTGAGGTTCAGATCTGGGCTCAAATCT
3069	2	131.703	21	T	C	TGCAGGTGCCCGCTTCTCCTYCTTCTTGTCTTTGGTTATTAACAGTAATGCTGGCAGCATACATCTTCTCAAGGCTACCTTAGGTATTTGGGAAAT
1720	2	133.898	74	A	T	TGCAGGTAGGGCACTGCTTAAATCCATGAGTTCAAGGTCAGCTTGAACAACATAACAAACCTCTCTACAGAAGWCTGAGAGAAAGCACTCAATAAA
8264	2	134.427	89	A	G	TGCAGGGCCAACTTGGTCTCAGGACTTTGATCTTCCTCCTGGGCCTCCCTGTGGCCTGGAGTGTGCGTGCTGGGCTGGCTCCAGGGACRGGAGCCA
3009	2	134.427	49	G	A	TGCAGGCTGTGAAGTCACCACTCTGACTCAGGGCTGCTATGTGCTGACRGAGCACCCACAGCCCATCCTGGGCTGCTGTTCACCAGGGTGCCTGGA
11554	2	134.427	25	A	G	TGCAGGCCTACCACCCAGGCAACCRCTCGCGCTCCTGCACTTGGAGGCACACGCCAGCCTGGTGCTACACCACTCATCTCCCGCGGCAGTGTGGAC
14234	2	134.965	81	G	A	TGCAGGCAGGGAACAAGGCAAGTCTGTGGCAGCTCAGTAGCAAACGCTCACACAGGACATGGGGGCCAGGGTGAGCAGGCRCTATCTCGGCTTCCT
3061	2	134.965	64	G	A	TGCAGGTGGGACGGCCTGAGTGCTTTCAGCTGGTGGAGTGAGCTCTCTATCGGCTGAAGGACGRTGTTTGAACTCATGGACAGAGCCCTGCCTCTC
13466	2	136.596	37	G	C	TGCAGGCTCCCTCTCCAGGCTGGGCCTCTGCTCTGASCCTGTGGATCTGGCTTCCCAGCCCAAAGTCCTGACCCTCAGATTTGCTGGGGGAGCCTC
9800	2	136.596	21	C	T	TGCAGGTGGTTCTGTCCAGGYGCCAACCCCTACACGGGAACTCCCGACTGGTTGTATGCAGGGGATTACTTTGAGCGTAATTTCTCAGACTGCCCA
11759	2	136.596	79	C	A	TGCAGGGTGGGGCAGACACCTAGGAATGACACCACACATGACATAGGCAGTTTGGAGAGTCTGAGAACCTTTGTCAGGMAGATCTGTACTCTGTCT
4308	2	137.131	27	G	T	TGCAGGATATTTAACAGAAATGAGGCKGAGAGAAAGTAAAAACAGCCTTTCTCAGGATGGGAGCCCACCATGGCCTTGGCAGCTGGCACATGAGTC
6895	2	137.131	14	C	T	TGCAGGACAACCAYCTTGTCTTTCTTGAGTTGGGGTTTGTCGCATTTGGCTAGATGGCAACTCTAGCTCTCCTTCCCGACACCTGGTCCCTAAAGT
12932	3	0	26	G	A	TGCAGGAGTGGCCTTGTCAGTGGGCRAGCAAACGTGCCCCTATGTCCCTGGTGAGTTACGTAGAGAAGGGTCCGTAAGTCAGAGTTGTTCCGAGAT
9888	3	1.14585	83	C	T	TGCAGGAGTCACAAAACCGTTCTTCTGCTGCGAGACTCAGTTGAGTCCCAACCCCTCGCCCTGTTCCCATATTTCATCCCTTYGCAAACGCCCTCC
14303	3	1.17841	43	A	G	TGCAGGCCACTCCTGCCAGGTCTGTAGCTTCCTTTTCCAAATRTGAGTTGTCCATCAACATGTGAAAAATCACATTTCATGGAAAACTCCACCACT
529	3	2.26429	12	T	C	TGCAGGAACCTYGCCACCTGCTCATACGCTTTTGTATACTTGTGCTTAACAACCAGCTCACACCATCGATGGCGAACCTTGGGAAACAAGACAGGA
16462	3	2.26429	58	G	A	TGCAGGAGGAAGTAGGAAAGCTAGCGCTGTGTGGTTGGACGTGGGTCTCTCATAGAARTGAGATGACCCAACTGAGTCCATCCTGATCGTAGACGC
5892	3	2.26429	61	C	G	TGCAGGGCTGTAATCATCTGAAGTGGATTCTGTGGGACTTCAGAGCATCAGAATGGCAGGSGGCAAGGTCAGGCTGTCCTTCCACTGTGATTCACC
11709	3	4.45858	16	A	G	TGCAGGAGAAGAGCCRCCTGGAGCACAGGAAGCTGCGGTCCAGCCAGGTACCTGCTTCTGCCTTACTCACTTCCAGCGCATTTTCTCTCTAACAGG
8998	3	4.98791	32	T	A	TGCAGGGCACCTGACAGCAGGCTGCCGCCCTWCCGCTGTGCTGTAATCAACATTTGTGGGCATGGGGGCCATGGGGCTCACGAGGTTCCTTCCCTC
9593	3	5.52563	34	G	A	TGCAGGGTGAAAAGTATTGAGGAGGCACCGAGTRACCTTCCACTTCTGCCATTCTGATTTGGAACTCGCCATCATCCTAGAGTAATTAGTTTGGAT
7495	3	5.52563	24	T	A	TGCAGGAGTCCTGGCCTCCCCTGWGCGCTCCAGCAAGTCCAGTTAGCCCCACTGTCCTCTGCTGGCAGACCACTTTCCCACCTACACGGTGGCCGC
6048	3	6.12511	17	G	T	TGCAGGCGCTCCCAGCKGGACTCAATGCAGCACGAGCCATGCTGAAACCACTCCCCTGCATGTGTCCTTCCAGGTGACTTCAGACACATAAAAGCC
5493	3	8.98722	63	A	G	TGCAGGCTAAGCTTCTTAGCTAGGGAGGGCAGGTAGTTCGGTTTCCACGTCTTAGCCAATGGRCGAGAGACAACCATTCTCTTCATCTCGGGTACC
9970	3	9.52983	35	T	C	TGCAGGCATGTATGTATGTGCCCCATTTGTGTGTYTGTTGCTCAAGGACATCAGAAGAGGGTGCTAGATCCCCTGTATCTAGAGTTAGAAATGGTT
5932	3	9.52983	32	G	A	TGCAGGCTCTGCTCCAAACCCACTCTGGCTTRTGGACAGCTGGAGCCTGTGGCCCACAAGTGCCTAGACCTCAGTGTAGCAAGCAGGGGAGGGAGG
13439	3	9.52983	44	T	C	TGCAGGGGAGCAGCGGTCGCCAGCGCCGCCTGGGGCTGTGGTGYGCACCCTTCTCCTTCGCTTTGCCGTGACGCTCCCGACCTGCACTGCAGCTGT
10481	3	10.0706	37	G	T	TGCAGGCATGCGGAAAGCCCCACCTGACTCTCCAGCKACAACAGGAGCTGGGACCTTGAAGGTTCCTATTTCAGTGAGGTTGTAGGAGCTTGGCGT
14078	3	10.6147	21	G	A	TGCAGGAGGGGTGGGGAGTGRGAGTAGGTGGAGAAGGAACCGCTCATGTAGCTCTGGTAGATGGAGGTGGCGTAGGCGCCCCGCTCCTCCCTGGAT
5238	3	11.1531	44	C	T	TGCAGGCCACCCTGGCTCAATGCCAAGCCTGCAGCCCCACCCTYCGCCCTGATGGTACTAACCCTGGCCAGGGAAGCCAGGCTAAATGCTCTCTGC
11997	3	11.1531	42	A	G	TGCAGGGCAGGAGGCCAGGAGGGAGCTGGGAACCCACGGAGRAGGGAGGCAGGCCGCAGAGGAGGGAGTCTGTCTAGTGAAGAATCGGACTGAGTT
7306	3	11.1531	32	T	G	TGCAGGAGGCGCAAGTTCCTTTCATCTCCCAKGAGCGCTGCTCCAACGCTGACGTGCACGGGGACGCCATCCTGCCTGGGATGCTTTGCGCTGGCT
11299	3	11.6884	80	G	A	TGCAGGAGCGTTTGCAGTCACTCAGTAAATGGTCATCCATTACCAGAATGCATGAGGGAGAGATGCCCCCAGCCTGTCCRTCTACAGACACGTAGC
1011	3	11.6884	38	A	G	TGCAGGACAGATGGCCAGGCAGAACCACTGACTACTTRTCTTGTGTCTCTGAGTTCTTTCTGAAACTGGCCATGTCCTTCATTCCTTCTCCACCTT
12442	3	11.6884	26	C	A	TGCAGGGATCATTCTTCACAGCTCGMGTTCAGGTGGCTCGCGCTCAAATGTAGGCACACGCATTTTCCTACGTGCTCTTGAACTTGTGCCTTTCAT
2445	3	11.6884	13	T	C	TGCAGGTTCTGGYACTCCAGACTAGGGTCAGCCACCTCAGAGGATACAGAGAAGCCAGGATTCTAGATTTCTTGGAATCAAACTTTTAACATTTGG
140	3	16.2124	67	G	A	TGCAGGTGTTGTTAATGAGCATAGTCCCTGGAGCTGTATTTATTCTTAGCTTGTGCTCATTTGAGARTTTAACCTGGTTATACGCTCTGAAAATGC
2169	3	17.6089	25	C	A	TGCAGGGAGCATGCCGAGGCCTTCMAAACCACAGCCAGCAGAGTCATGTCCGAGGAGAGCCAAGTTGTTAAAAATCAAGCCTTGAGGTTTTGAAAT
268	3	23.0553	78	G	A	TGCAGGGCGCAGGCGCGTTTGCACACCACCACGCCCAAGCAGGACTTCTTGAGGATGTGACCATTGTGGTTGTTGGTRTTGCGCATGGCCCAGCCA
3858	3	24.6628	69	A	T	TGCAGGAGGTTTCTCTATTCCACCAAGAATTCCCTTCATGGACTGCCATCACAAGGCCCAAAGCAGTTWCAGAAGGAAACCCTGGAACTGCAGGAA
4639	3	25.7268	19	C	T	TGCAGGCTGCAGGTTAGCYGTCTGCCCATCGGTAGAGGTGACTGCTGGCTGGTGAATAGGTGCTTCAGACAAAGCAGTGGGAGCAGGTGGAGACTG
8057	3	29.6518	55	G	A	TGCAGGGCTTGCTAACTGTCTATGAGACTTTGTGTGAGGTGAAGGCTGGGGAGCRCTCAGGGAAGTCATCTGCTCTGGGGCCAGAGCTTTCCAGCT
5550	3	30.1668	32	G	A	TGCAGGAAGATGGATGCACAGCTTAGGAGAARATGGCATTTGATTCTAGCTGGTCACTCAGAACCTCCTTCCAGAGGGTCACTGTGACTTCCTCTC
13016	3	31.8089	87	C	T	TGCAGGGCACGTGGTACCTCCCCACATCATTTTGCCATCCAGAATAGCACCAGCAACCTTAAGGCTTTTGCCATCACAGAATTCTTYGGCTTCTTG
7341	3	32.3451	36	G	T	TGCAGGAAGTCCTGAGGAGAGAGAGCAGAAGAGGTKTGCTTGCGGGTGCTCTGGCGTGTGCACCCCTTTCCCAATCTGTCACAGCAGGTATGGTAC
1926	3	33.9953	45	C	T	TGCAGGAGAAAGTACAGGAGGTACAATAGCAGGAGAATCTTCTCYCGATGCAAGTCCAGGCTGGATGTCTTCCAGGAAGTACACAACTGCTTATTC
11831	3	33.9953	55	A	G	TGCAGGCTCATTGGAGTCACTAAGTAAACTTGAGGAAAATATGCAGGAACCAGGRACTTACTGGAGCAGTGGTTCTCAACCTTCCTAATGCTTCGA
15333	3	34.55	68	G	A	TGCAGGCTGGCAGTCCCACGAAGCAAAGTCCAACTACAAAAATCAAATATAGTTTCCAAATAAATTGRAAAGTTAGTGACCACTAGACTGATATGT
10628	3	35.643	33	T	C	TGCAGGCCTCAGTGATCACACAACCCAGTGCTYCTGGGCCCCTCCCTCTGCAGATGGAGCTGATGACCTGGACTGCATCTACAGTGAGGCCCCCTT
832	3	37.9858	17	A	G	TGCAGGAGGCTTGTGARGCCTACCTGGTGGGTCTGTTTGAGGACACCAACCTGTGCGCCATCCATGCCAAGCGCGTCACCATCATGCCCAAGGACA
2198	3	48.9515	47	C	A	TGCAGGCAAATGGTCCTGATGAAGGGACCAGATTCTCCCACACTAGMTTTTTCTTCTCCAGACTCCTGGATCACAAAGCACCAGCATCCAGGCAAA
2158	3	48.9515	48	A	T	TGCAGGGATTCTCAATATGAAATCCAGCAACAGAGATCAGTACGCACWGTTTACCCAGCACAGGGGACCCTGGGCCAGGGACCAGTGACTGCATGT
9668	3	49.4889	69	A	G	TGCAGGGTTCTGGCCTGCCTCTGATTCCATTCATCCCTCTCTGTGACTGCACAGAAGTCTCCAGAGAGRTCGTGTCATTTCCAAGCATCCCTAAAG
9918	3	50.0265	12	G	A	TGCAGGCCTGCRATATAAACAGTGTATGCTGGGAACGCAGAATGCTGAAGTTAACCCCTGGGAAAGATGATGTCAGCTTAAAAAGCCTCCGAGGAG
10028	3	50.0265	60	G	A	TGCAGGGCCCAGAGCTGCTGTCTACACAGTCCCCCATTTCTAAATACCACAAGGGCAGARCTAAGGAGCCATCCAAGTCCAATGTGGGAGTGGCAG
11954	3	50.5642	23	T	C	TGCAGGGGGCCTTGGATGAAGAYGGCAGGGCCAGATCATCGAGGAAGGGGCTTGGGTGGTGGAGGAAGGAGCGGGGATGGAGGCGGCTGGGCGGGT
7390	3	50.5642	16	T	C	TGCAGGTTTACAAATYTGCATTATGCCCAGACGGGATTCGCCTGGCACGCTCCTGCCGCTCTAGAGAGGTAGAACCTTCCGCTACCTAGATACGAA
4222	3	50.5642	62	G	A	TGCAGGCAGCTGGTTGTAACCCCTCACATGTCCTGACAGGGGCAGGTGGCATTGGGCTCTARACAACTGATACTTCTCCTCAACATCTGCCAAGTT
3211	3	51.9956	44	G	C	TGCAGGAGCTGGTGGGTTGGGAGCTGCTTCTGCCTGTGCTCTTSAGCCATGTTGTCTCTGGAGGGAGAGAGATTACTCTCTTCTCACTGTGGGAGG
2095	3	56.2989	19	T	C	TGCAGGTTTTATTCTTTCYCCATGCCAGGCAGGCTTTGGTTTGGCCACAGTCCTGGATCCTAAGTGCTCATCGGGATGACCCATCAACACAGTCGG
5157	3	56.8175	17	T	C	TGCAGGTTGTCTGTCTYTGCCCACTGATGGGGTCTCCAGCCCTGGTCCTCCTCTGTCCACTCCCTTGTTATACCAGGCTGCTGGGCCCCCAATCCC
7196	3	56.8175	65	A	G	TGCAGGACCATGCAGGGAGGGGAGGAGTCCTCGCTGGTTTGGCAGTTCAAGGTAGGGCCAGACARAGTGGATGGGGACATAGCTGCACTTACGATT
10692	3	57.3551	74	T	A	TGCAGGGAGGGCGCGCAAGGATAAGCTAGGAATTGTAGTTCCTGGGCCCCGAGTGGGCGGGCGCGAGGCTCCAWGTGCGCAGGCGCACTGTCGTTC
8828	3	57.3551	26	G	A	TGCAGGAGGTGGGCAAGGGGGCAGGRTAGGGACAACAGCTGGATGCTAGGGTGTGTGAAGCTGATAACTGGTCCTGGGATCCCCTTTGGCTGCAGG
6056	3	57.3551	55	C	G	TGCAGGGAGCTGAGCTGGTGGTAAGGCTGGCTTTGTTTCCAAGCCAGTGCTGAGSTAACAAGGCCAGCACAGGGCACATTCATACAGCCTCACATT
14400	3	57.8928	43	G	A	TGCAGGCAGCACCCACTTCAAGGATGTCAAGAGCAGGGAAACRGCATCTGGGATCTATCTGTGGTTGTTGGCTTGCACATTTGGAGGGCGAGGGAT
8110	3	57.8928	47	G	A	TGCAGGGCCGCAGTGTGTCCAAAGACTTGCGATGTCACCTCGAGCCRCTTCGCCCCTGCAAGGCAGCCACCCTCTGGCTGCAGAGACACCGCTTCT
5649	3	57.8928	18	G	T	TGCAGGATTACTCGTCCKTATTTTGTCCTGATGCACAGACACTTCAGCTCAGGGTTAACTAACAGAGTTCATTTTAGAAAGACGACATTGCACAAC
3317	3	57.8928	35	A	G	TGCAGGCCATGGGCTTGACTCACCTAGAGCTTTARCCCATTGGCCCTGTTCCATTTTGCACCTCTCCCATAGACTTCTACACTTCATGCTGGAAGT
7862	3	57.8928	74	G	T	TGCAGGACTCAGGGGTCCTCTTTTTCCCAAGAACAAGTTAGCTTGAGCCAGATGGAACTTTCCAGAACTGGTAKGAACAGTCAGTTGATTCACGTC
12086	3	57.8928	33	C	T	TGCAGGCTGGAAGATCAGGTGGCTCTCACATCYTTGTTGTTCCCTGCAACCTCTGCCCTTCTTAGCATAGCGCCTGAGCTGGTCTGTGAACTTGAC
13040	3	57.8928	87	T	G	TGCAGGTTATTCACTTTCAAGACAGACGCTTGGGTAGCTTGGACCATAGCTGCCCACTCCCCAGCCTCTATACCCTAGTCCTCTGAKCTCAGGCAG
3832	3	60.6407	23	C	T	TGCAGGAGCCTACAGTCCAGGCYCTCTTTCTCCATCTACCTAGAAGCTGACACCGAATGCTGGAGCAGATGGAGCAGAGGCCTCTGTCCTATGTGT
3267	3	60.6407	14	C	T	TGCAGGAGGCTCAYCTCGCTGTGTTTGTGTCAGCTGTCATTCATGGGATTTCTCTTTCTGACCAACTGCATTCCTTTGAGTAGTAGTGAGCGAGCT
16349	3	60.6407	69	A	C	TGCAGGCTCCTCAGGAGCCAAGGCTGTTTTTCTCAGATTCCCCTTATTTTGGGATGACCCTGACTGGGMTTGGCAGTGCTTGTCACATCCTCTTCT
15163	3	60.6407	20	T	C	TGCAGGGCAAGGTTGCCTGYTCTCTGAACTGGGGTGCTGGGTAAGTCTGCAGATATCACTACTAATTCTTGAGGCATCGCGGGAAACAGGTTAGAG
3914	3	61.1784	70	A	G	TGCAGGTGGGTGTAAGGGAGCTGCCTGCCTCAGAGGATGTCTTCTCAGATCCACTGTTCTGAGAGCTGCRGCCTGATCTGTCCCCTTTGCTGCCTG
10235	3	61.1784	40	C	T	TGCAGGACCTGGCTGGGCATACTCTCTTGGGATTGAGTAYACTATCCCTCTGTAGGGAACAGTTTGGGATGTGGGAGTCATTTGAGGTCCTCTGAG
13395	3	61.1784	44	A	G	TGCAGGGCAGAGCTGCTCTGTGGAAGGGTGCAGCCATCAGCCTRAGTTCTCAGGGAGGAAAATGCCAGCATGTGGTCGTCCCTGGGCACAGTTCCC
10857	3	61.5521	41	T	C	TGCAGGAGAGCTGGGCTACAGCATGCCATGCAGGAGCAGGYGGGAAGAGGCAGGGAGGCAGTGGAGGGGTTAGCATGTTTGAGGAGGTGGGTTTGA
12649	3	61.5521	17	A	T	TGCAGGTTGTGCAGTGWGCTCCAGGTTCCCAGCTTTTGTGAGCTGTCACCCATGCTGGGGTGCACTTTGGTGATGCAGCTGCCTTTGAGTTATTTC
16163	3	63.0199	68	A	G	TGCAGGATGATTGCAAAGATGAAACAGAATAGGGTATGTACATCAGTTAGGAATGCTTGTGCTAGGGRAATAGACTCTACAGGACTCCATGGAAAC
13704	3	63.5416	13	C	A	TGCAGGAGTCACMTCTCTTCTTCCATCCTGTAGGGCCTAGGGAGGAACTCAGGTGGTCAGGCCTGGCAGCAGGATGGTTCATCTGCCCAGGCCCCT
9915	3	66.3134	17	C	T	TGCAGGGACATAGTGAYGAGGTAAGGTATGCTGTGGCGGGCAGGCTCTGGGTCTCAGTCCCCAGCGCTGGGCCACTTTCTTTAAGAGAAGCGCTCC
1350	3	66.8398	29	G	T	TGCAGGTGACCCACCAGGGAGGTCAGTCKGCCTGGGGCGCCCTGAACTCTGGCATGCTCCAGGTGCGTGGTGGGGGTGGCGCATCGCGCTCCACGT
10715	3	66.8398	26	A	G	TGCAGGCTGAGAAGGCTGAGAACTCRATAGCTTGTCCATCTAATCTGGCAGTGGAGGCTCAGGGCATCCCTGGAGAGCCACCGATGTCTACATTAA
10572	3	66.8398	72	G	A	TGCAGGCTCCAGATCCTGGGGCCTGGTCTGTCTTGTATTTCTTGTGATTTAATTGAGCATTATGTTTTGTTRTTGTCCTTAGATGTAAAGTGGGGT
8315	3	66.8398	51	A	G	TGCAGGCAGGAGTCATTCTTTGAATAATCTTTTCTCATATCACATGTACCRTGTACTTTTCTTCTTGCTATAACAAAAACCCTAAAAACAACAGTT
5804	3	66.8398	92	T	C	TGCAGGGAACTGGCAGACATCACTCACCATTTGGTCCTCATGAGCAGCCAGCAGACAGAGAGGGTCACATCTCAGCCCCCAGCTTGCAGCAYGCAT
15827	3	66.8398	42	A	G	TGCAGGAGAAAAGTACTCAGGGGTGTGAGCACAGCATCTCGRGGTTCAAGCCCTCCCTGTCCAGTTCCTAGTCTACAACATGTGCTCTAATGTCAG
13018	3	66.8398	78	A	G	TGCAGGGCCTTAGGGAGGAAGTCACACTTAGCATCCTCTTCATACTGTATGAATCTGGAACCTGCTTTAACCTTGCCRTGTAGTAGGTACAGAAAC
15211	3	66.8398	87	G	A	TGCAGGAGAGATCAGAGCTGAGGCAGGTGACAGGGGCTGCTTAGCCATGCATCCTTCCTGTCCTGTGTTTAAACATGTCAGGATTGRAAGATGGAC
13535	3	67.3774	44	T	C	TGCAGGAACTGAGAGATCTGCTCCATTTGCTTGAAGGCCATTGYGGAGGCCTGGATCTTCTTTACTGGTGCCTGCCCCTCGGGGTATAGCGAATTG
9344	3	67.3774	54	T	C	TGCAGGCCCAAGGTGGAGCAGGGCATGTGGCACTCAGGGTGGGAAGGGTGCCAYACCCTAAGTTGTTTGATGCCCTCTGCTCCTCAGCCATTAAGT
2975	3	67.3774	51	C	G	TGCAGGGAAGTACTCAAGACCTACAACGTGGCCATGGACTACCCCACACTSTTCCTGGCCGTCTGGAACTTCGGAGCAGTGGGCATGGTGTGCATC
511	3	67.915	36	A	G	TGCAGGAGTTGGCACGAATCTTCCTAAATTAGGGGRGAAATAGTGTGGATTTACATGTTGTCTTGGGAAAGAGCCTAAACTTTCATCTAAAGTTTA
16182	3	67.915	49	C	T	TGCAGGCAAGCCAGAGGTATCTAGCCACAGCTGTGTTTACATTCACCCYGACTCCCCCAACTTTGGGGCTCACTGGATGAAAGCCCCCATCTCCTT
15332	3	67.915	78	A	G	TGCAGGGTTAGACTGCTGGTATTAACTGGAAATAATTTTGCTTCCTTGGGGGACATCTGACAGTGTCAGGATAATCCRTCATTTCTCATGGCTAGG
13426	3	68.4527	19	C	A	TGCAGGACCCGAAGAGCTMGAGACTGGGATCTATTGGAAAGTAAGTTTGCAGATTCAGGCCCCTCAGCCCCAAGGCAAAAGATGGGGGAGGGAGGA
12890	3	68.994	37	G	A	TGCAGGATTCAAACCTGTCTCTTTGAAGTGCTTGCTRGGATATTACATCATAAGAATGAGTCCATTTTTAGTTATCGCCTCTCACCTCCACTTTCC
8792	3	70.1012	64	A	G	TGCAGGCTCACGATAATCTGTTTACTAGGCAGGAATTATGATCTTCATATCACAGATGGAAAARGTGGCAGATGACACATTAGCTTCTCAAGAGTC
7009	3	71.7545	85	G	A	TGCAGGCAAACACTTCCCACTCCAGGCTCTGCTTATAAATGAATGCTTATTCAAGCAGAAGTTTCAGACCCTACATCCCCAGATRTAAGGTTGGAG
14097	3	73.3881	48	G	T	TGCAGGACCACGGTGGAGTGCCAGGTCGGAGGGAACTGCCCGATAAGKATTTACACACCCATCCTCCCACACACACCAGAACCCCAGGAAGCCTGC
2296	3	74.4664	64	C	T	TGCAGGGCCAAAGGGGAAACAGCCCTGTCTGGGGGCCACTGGAGAAGGATGTTTCTTCCCTCTYTTTCAAAGCAAAGCTTTCTGGTTGGACTCACT
1193	3	74.4664	25	T	G	TGCAGGGACTCAGGATGGCCCAGAKGCAGTAGAAGGATCTCTGGCAGGGGCCCAGAACTCCAGCAGAGGTCTGGCAGTGGTTATCAGAGTTAAGGC
8679	3	74.4664	63	G	A	TGCAGGTTCTATACACTTAGACCACCCTCATGTATGAGTTACTGCTTCTAGAGTCAAAGGTCRAGGGTCAGCTTTTATTCATCCTTTCCAGCCGAG
11874	3	74.4664	16	A	C	TGCAGGTTTCCCCAGMAGGATGATGAAAGATCCAGACACTGCGCCAAGTAACGGCTCCACAAAGCTAGTGAGAGGCAAGACTCTGACCCAGGAACA
12578	3	74.4664	40	T	G	TGCAGGCTCACTGCATTTCATGATAAGGAGGTCCTTATCKGCTTTTCTTCAAGAGAAAGTCAAGCTGGCTGGGGAAATGACTCAGTGGATAAGAGG
1605	3	74.4664	30	C	T	TGCAGGAGTGAACAGCTCTGACCTCGTACYTTCCCTTTTGACCAGTATCCATGTTTGCGGGTTTGTGCCCCTTCCTTCTTCATTCAGCCTTTATTT
14720	3	81.356	83	T	C	TGCAGGTAACTGCAGCTCTGACTGATAGCTTTTCAAGCTACTGAGATAGCCCAGTACAAACCACCTAGGGAATCTGCTCCATYCTCAATTCTTACA
14968	3	84.6542	27	G	T	TGCAGGGAGGAGGCAGCAGGGAGGGCKCCTGGCCAAACGGGCTGTCTCTCAGCTGTCTCCTGATAGTGAGGAAATCCACTTAGCTGTGTTGTCTTC
11187	3	84.6542	18	A	G	TGCAGGCCTGCTTTCATRTCTGTATCATTCCTGCTTTCCCACTCCCCCATCTCTATTTTTTCCATCTTCCACCAGCTTCTGGCTAAGATAGAGGCA
1948	3	84.6542	23	C	A	TGCAGGCACTTGGAAGGTCTGCMTAAAAACTGCCTGCAGCCAAGCAGAGGAACCAACCTCCCTGTCCTAGAAAAGCCTCCAGTGGCTGTCTGTCAT
15713	3	84.6542	76	G	A	TGCAGGTCAGTGAGCAAGGACTGGAATGGGGGAGAAGTGGGTGGGGGACAGCCAGAGGTGTCCACATATGTGACCRTCATCCTCACAGGCCTAAGT
12938	3	84.6542	91	C	T	TGCAGGTATGTCTGTATGAGGGTGCTGGATCCCCTGGAACTAAAGTTATAGACAGTTATGAGCTGCCACATGGGTCCTCTAAAAGAACAGYCAGTT
4412	3	84.6542	17	A	C	TGCAGGATGAAGAACCMGATGCTGGAAGTGGTGTCCCTCCTCCTGGAGAAGCTGCTCCTCATCTCCAACTTTAAGTTCTTTAGCGTGAGCGCTCCT
9987	3	85.7381	55	T	C	TGCAGGTTTCCTGCCCTCCATTCCCTCGCATTCTGTGCCCACAAAAACAAAAACYCCTCTTACCCCTACCAGCCATGCTCTGTAAGCGACAGAGTC
1179	3	86.2762	74	C	T	TGCAGGCATGGCTCTGGGCTCGAGGGCTGAGCTAGCCAGGAAGGAGAGATGCCCATTTTCCTGAGAGAAAAGCYTGCTTCCTTCCCATTGCTGGAA
4709	3	86.8171	19	A	C	TGCAGGTCAGCCAAGCTTMCTCAGACAGGGCCTCATGGGGGTATGAGAGGCAATGGGTGGGGACTTTAGCGAGAGTCCTGGTGGGCTGGGCTGGGA
13162	3	86.8171	16	T	C	TGCAGGCTACAACTGYCAGGTGAATATTAATGAATGTGCCTCAAATCCATGTCTGAACCAAGGAACCTGCTTTGATGACATTAGTGGCTACACTTG
7521	3	86.8171	19	A	T	TGCAGGCGCGGTGGCTAGWGCAAGGTCTCCTTCACCTCGGGCCCTGCCCCGCCCCGCCCTGCCAGGCCATCACGACCGAGGGTCCCCAGAGGGTGC
4476	3	87.5301	35	A	C	TGCAGGGGCTAGAATTGCCCTCAGCACAGAGCAGMCTACTCAAGCTGCCCTGGGAAGTGAGTAAGTGCCCAGGTGGTATTTCAGTGCTGAATCTAG
1683	3	88.9554	37	A	C	TGCAGGCAGGGAGTGACTGCACACACCATGGAAGGGMGTAGACTTCCTCAGCAGCACTAATGACAAATACTATGATTACAGACAACTTGGTCTCTT
6391	3	95.8803	22	A	G	TGCAGGTGGAGGGGTCAGGAARGTTTCGGCTCTTGCTTCTAGAAGGGGGTGGGAGCACCTGGCAGCCAAACGGCAGCTGATTCATACAAATGGTAT
408	3	98.589	31	A	C	TGCAGGTTTTTCCCGCCTCCAGTCTGGTCCMACTGCCACACCAGCCCCTAATAACACACAGAGACTTTGTATTTGATATAATTTTGTTGGCCAGTT
9397	3	104.938	48	C	T	TGCAGGGAGGAAAGAAAGGAGGAGATCACAGGAAAGAGCAGGTAACAYATGTGCCTGGCAGAGACAGTGGACAGCGCTTCTGCTCAGAGACTCATC
6256	3	105.484	36	A	G	TGCAGGCTTTGGAGCCTTTCTGTTCCTTGTGAGCGRTCGCCTATCTGTCCGAAAGCCTTGCTCTTTTGAGGTTGAAGTCTGAAGCAGTTGTCCTTC
16339	3	105.484	52	A	G	TGCAGGATCCTCACTTCATGGTAGGGAAACAGAGGAGCAGAGAAAGCCAAARGATGTGGCTAGCTAAGACCGTGCTGCTTGAAGCAGCAGAAACAG
11749	3	109.458	49	G	A	TGCAGGGAAGGCAGGCAATAGTCCTTATAGTTACGCAGATAAACTGAARCATACCATCATTACAAAGTGTACCCTGCACCCTTTTCCCTGGGGTGT
5929	3	111.247	86	C	A	TGCAGGATGTGAGGCAGGACCCAGCCTACCGCCTTCAAATTCTCACTTTAGCACGATGCACCCTGGCTTCCTCAGGAGGCACAGCMTGGCAGGAAG
9217	3	114.115	61	A	C	TGCAGGAGTCATCCTCACTGGGGGTTTGTGGTGAATAAACCACTAGTCTGGCCTTCCAGCMGACATCGCTCATCTCCCAAGGCCCTGAGCTCTCAG
11867	3	115.301	24	T	G	TGCAGGTCAGCCATCTCTAAATCKGTCCCTCCTTTCCACTACATCGTCTGTGTGCACAGACTTGCAGAACAGTTTAAAGGAGCCCTGCACGGGACC
5455	3	116.931	46	G	T	TGCAGGGAACCTTACAACCTAACGGTGACAAGCTTTTAAGGCATCKTAATAGGATAGCATTCCAAGTACAATGCCACCACAGAGCACGTCGGGACT
2775	3	136.366	80	C	A	TGCAGGGTAAAAATGGTTCCTACCACCTGAGTGTTATGCTTCTGCACAGAAGCCTTTACACCCGACTGCTTCTGGAACCMAACCCCCTCCCAAGCC
8939	3	136.366	21	A	G	TGCAGGCTGGAGCAGCAGCCRCCCAGTGGGTCTGCTTCTGGATTTTAAAGACGGTTCATGAATATTTATGACCAGATGTTAGCTCATCCAGGTTCT
2003	3	136.952	11	C	T	TGCAGGGGAGYACTCGCCTTGCTTTGCTGACATAACCACTGCTTTGCTAAACAACTTCTGCTTAATTCTCTTGACTGAATTCATTCTTTTGAAGAC
3812	4	0	27	G	A	TGCAGGATGTTTCCTCCTGGATAGTCRGGTGTAGCTCTAGCCAAGGTCTAGCCAAGGCCTGGTGATGGGAGACCCTCCTTTGTTATGGCAGGTTTT
5120	4	1.67068	38	T	C	TGCAGGGGGCCGCGCGTGGAGCGGTGCTTGGGGGCCGYGGAGGGCTTCGCCTTGCTGATCTCCCGCTCCGCGCGGTTCTCCAGGTTGAAGTTCCTG
4931	4	1.67068	23	G	T	TGCAGGATCATTGACACCCATTKCCTGACCTCTGCTGGAGCCCAATCTGTGACCTCCATAGCCAGGCCCCTGCCTGAGGAGAAACTTCCTAGAGAG
421	4	6.13023	66	G	C	TGCAGGCTCCCGATTCTTTTTCAAGTTACCAAGACGACAGTATCCCAGGGAGAACTGTGATTAGTSTAAACTCTCCACAGCTGTGAGAGATGGGAG
5542	4	6.13023	54	C	T	TGCAGGAGTTAACTATCGCCTCAGACCATGTGGGCTCTTGGGATCAAACTCAGYTCCTCGGGCTTGGCAGCCATGCCCTCACCCACCCAGCTATCT
13144	4	7.83883	49	C	G	TGCAGGCCAGAAGAGGGTGCCAGATCTCATTGCGGATGGTTATGCGCCSCCATGTTGTTGCTGAGAATTGATTGAACTCAGGACCTCTGGAAGGAC
9425	4	10.0817	21	T	G	TGCAGGCTCGCACTGGGAAGKCCTAGCCAATCAGAGCACAGAGTGAGAGGTGGCCCCGCCCCTCCTCCTATGGTCCTGCTGGAGTAGGGGTGTGCA
3751	4	17.5998	21	C	T	TGCAGGCCACCATTCTTCCAYCAGGATGATAATGGACCACATCTCTGAACTAGAAGCCAGCACTAATGAAATGTTTTCCTTAATAGAAGATTCCAT
1462	4	17.5998	30	T	C	TGCAGGATGGCTCTAAAACAAGTCTTAGCYCTCTAACTTGGGCATATACTTGCACTGCTGTACCCATCACAGTAGATGGGGACTTTAATTCTTTCC
12008	4	20.4286	42	A	T	TGCAGGACTATCGTGAGATGTTAGGGTCATTCTGATGATCCWCTTGGGATTCATGCATAAAGTCCATTCCAGGAGCAGAGGGAGAACAAGAAAATA
10082	4	23.3385	22	T	C	TGCAGGGACCTGGACCACTTTYCCCCCAGGAGGCGTAACCACGTGTGGTGCGAACCTCTGGACAGGTAGCCACTGAGATTTCTCAGCCGTTGCTAC
11162	4	26.1791	25	T	A	TGCAGGACCAGAAACATTCATTCAWCATGTTGGCGCTGTTGAGAGGCACTGGAAAGAAGTGGGAGGTAGGGCTGGTTTGTTGGGGGAAGGAGGCCA
12698	4	26.7084	90	G	C	TGCAGGGTTGTCGGCTACAGTCCTCCGCTCTACCAGCTGAGCTATCGAAGGGACAAAGGGACGCACACGTGGCCCCCGACACCGAGCAGSCGTCGG
14996	4	27.2495	36	A	T	TGCAGGGGGCGGGGGAGGGGTGCGCGCTTCGGAGCWTCTGGTCGCCTGGCAACCGTCTGCCCGCCGCCTTGGAGGAGACTGGCACAAGGACACTGA
7459	4	27.7731	35	G	C	TGCAGGCCTGGGAGAGCCAGAGCCTGGTGTTGGGSTTGAGGGGGTTCCAGGAAGGTTGTGAGATAGTGGGTGCTGGCACCAGATGCTTAAAAGAAG
3285	4	31.0933	24	A	C	TGCAGGACAACAGGACACACAGAMCCTGACTCCCAGCACACAGCTACCCTCAACCAGAAACGCCAGCTTCGCAGGAGAACTTATGTCCTCGCGAGG
11875	4	31.0933	18	G	A	TGCAGGTTGCTGTTTGCRTCCGTCTTCAACCCATGGGGCTTACTAGCTCAAACCCTGACCAGTCTGCGGAGCTGCGTCTCTATGTTCTGACCCACC
4381	4	34.9734	54	T	C	TGCAGGAAGTCACCTTCGCCTCATCCAGGTGCTGGAGCCTCAGGGACCATGTCYTAGCAAAAGCAAGGGCCTACCTCCTGCCAAGGAGATGAGTTA
1044	4	34.9734	23	C	T	TGCAGGGGGGTGTGGGGTGCCGYTGTGCCTGCCACCTTCATTTTACTCCTGGATTAGATCCAGCCCCTCCAGGTCACTGGCCAGGTGTGTGCCTCT
4065	4	35.5112	52	A	G	TGCAGGACACTCATACCTAAGAGACAGTCATGGGGAGGAAAGGTCAGCTTTRCATACAGACTGCAAACAATTCTTTTATCTTGTCAGCTGACGTGG
6564	4	36.0497	68	C	G	TGCAGGGAGCATACTGAGCAGTGGGCACGTGCAGATGCAGATGGTTCTGTGGGGAAGTCTGGCTGCCSTGGCCGTGTTCTTCCTTGTCACCTTCCT
4482	4	36.0497	67	T	C	TGCAGGGAAGAGCAGTGCTGTCTGCAGATATGAGTCTCCATGGCCATGCTTTGGGAAGGGCTCTGAYGATAGGACCCAAAAAATCCAGCTCCAAGG
16243	4	36.5818	32	T	C	TGCAGGCTTGCCTGTGAGCCTTCATGTGCCCYCACAAGTGGCCTTCACTGGATTTTCAGGTGCAAAAAGAAGAGTATACCCAGAATCAATTCTTGG
15952	4	38.2174	72	G	A	TGCAGGAAGGGACTGCACACAGTGGTACATCCTACTGCATCTTTCCTTGGACCAGCTAAGAACTCAGGAACRGTGGAGAAAACCAGCACAGGGCAG
14689	4	38.2174	12	C	T	TGCAGGCCATTYCTGCCACCACGCCAGCCCCCAATAATAATACACAGAGATGCTGTATTTGATATAATGCTGTTGGCCAGTTACTAATTTCTTATC
15671	4	40.4038	60	G	A	TGCAGGGTGGGGCTGCCATGTTCTACCCCCAGCTTTCCTTAGGGGTTGGGACAAGGGCTRCTGGGACAGATCTTGCTCGGTCTCTCTTTGGAGGCC
11820	4	40.4038	15	G	A	TGCAGGACACAGTCRAGCCAGATGTGTCCATCAGACATTCAAGGGGAAGTACTGACCTCACAGCTGTTCACAGCAGCTTGAACAGAGTAGAAATCT
2803	4	40.9213	84	G	A	TGCAGGCCAGAGAGAGCTCCAGATCTCATTATAGATGGTTGTGAGCCACCATGTGGTTGCTGGGACTTGAACTCAGGGCCTTTRGAAGAGCAACCA
15359	4	45.4287	67	A	T	TGCAGGCTTGTCACGTTGGTACGGACAGCAGCAGGATGAAATATCGAAGGCTGAAAGCAGTGATCCWTGAGATCCGACGCTGCAGAACGAAAGCTT
15977	4	47.5915	35	T	A	TGCAGGGTGCACGGAACCATTTCTAGAGAGAGGGWATGGCAGGTAGGCTAGAATCCCAGGCTTCGTGTTTTGCTTTCTAGCTACCTACCTCTTACC
1919	4	52.1056	20	A	G	TGCAGGAGGCGGGGATCCARCCCCATGTGTTCAAAACCCAGCGCATCTTGGTCCTCCATGGCGTGCCTCCGCGCTGACAGTGCGCACGCGTAAGGG
11226	4	53.6467	37	T	A	TGCAGGGGGAGTTATTGGGTGGAGACTGGAAAAGTGWGGGGTTGAGGCTCCTACCCCTGAGGGCTCTGACCCTAACCCCTGCTCCTGTGCTCACTG
13445	4	54.6959	87	T	C	TGCAGGCTCAGCAGACAGGGGGCCACAACTCTGAGATATTACAGTTGAATTTCTTAATCTCTGTTCCATCATTCATCTTATGAGCAYTTTTACAAT
6349	4	55.0754	37	G	A	TGCAGGTGAAGGTTGCAAAGGGAGCCTCTTTCCCCTRGAATCAGGACTCTGAGAAGCTGTTTTCTCCCAATGACATGAGGCCTGATCTCCTTGATG
14526	4	55.0754	59	G	A	TGCAGGACACATGTTCACACATGGCCTGGGTAAATGCCTAAGACTGAGAGAAACTGAGRAGCAAGCCCCTCAGCTAGTGCCATTCGTGTCCCCCTC
3138	4	56.1657	66	T	A	TGCAGGTCTGAGGTGCGGACAGCAGCATTTATAAAGTGTTTGCTGCTGTAGGCCCTGTTTCTAAAWGTTTCAACTCTCACAAAAATACCATGGAAA
16431	4	56.7069	19	G	T	TGCAGGATGGGCGGGCCAKTATCCTACTCTCAGGTCCTCAGATTGCATCATCCAAGCTCACATCACCAGGGCCAGCTCTACTGTTTTGCCCAGGCA
9947	4	56.7069	44	C	A	TGCAGGGAACCAAAGCAAAAGGCCTTAGTGGGCTGTTTTTCTGMAGGGCTGAAGGCAGGAACACCACACATTGAAGATCAGCCTTGACCATCACAG
3690	4	56.7069	27	T	C	TGCAGGCAAGGTATGTCCTCACTCTGYATCTTGCTCCCCCCACCCCTGCGATGATGGCGGTGTTCACTGGACTGAATATACAGGTTTGGGGTGAAT
13176	4	58.1591	50	T	C	TGCAGGAACTGGGATGACAGGGGGATGTGACCTACCTCTGGAGAAACAAYCTGCACTAACTGCTAAGCCATCTCTCCCCAGCCTCTCGCTCTTTCC
5687	4	58.1591	36	T	C	TGCAGGGCAAGGCTTGTCCAAATATTTGGCTTGATYCTGCTTTCTGATTCACCATGTGCAGAAACCTCTGTAATTTCATCCACTGTGTGACTCAGA
7842	4	58.5221	16	C	A	TGCAGGAAGACGTAAMAATAAAGAAAGCAGGATATAGAACTTTAGCTGTGGCCATAGTAACAGATGATGGAGAGGTACAAAAGGCAACCAAAGATG
14731	4	58.5221	26	G	A	TGCAGGGCTGGCAGGCAAGCGCTAGRAAGTCTCCTCTTCTCCAGCAACTGCTTGATGCTTACAGATAGATCCCCACAGAGCAGCCCTGGAATGAGC
6072	4	59.0542	69	A	G	TGCAGGTGGGTAGGAGCATCTCAAGATTTTGTGGGGAGGCAGCCTCCATTGCACAAGAGTACATACCTRTGGGTGGATCCCACTGCCCATACCCCC
523	4	60.6963	75	C	A	TGCAGGAAGTCAGGTTGCCTTAGATAAAAGTGGGGCAGACAGCCAAATCGATCCTAGCACCTTGTGTGATGCCTMTGTATATTTTCATGAGGGTTT
1927	4	61.2284	44	A	G	TGCAGGCTGGTGGACTACAGCATGCTTCAGCTCTAGCTGGGCARCTGTGTGCACACACATCTCCAGCTACACCCCTGTTACGAGCAGGTTTTTCCC
1287	4	61.2284	27	G	A	TGCAGGAACACATCTGCTCCAGGCTCRCCCCGCCCGACTTCTGACGGTGGCATACGTCTGATTCCTTTGATTAAAGAGAAGGGTTTGTTAGCATGT
10370	4	61.7661	20	T	C	TGCAGGCCTTGGGAGGCTGYTCTAAACCCATGGAAAGAATGTTTTTTTCAGGTACTAATAATCTGCAGGTTGGGGTAGGGGAATGAACAGGCTGGC
8116	4	62.3037	34	G	T	TGCAGGCACCAAAACTGCTCTAAATTTTGTGAAKGATTCCAATATTCAACAACATCTAGTTACTGCCTAACAGAGAACTACCTTGAACCATCAGAA
13643	4	62.3037	82	C	T	TGCAGGGAACAGGCTCCTCATCTACTCCTCTCACTGGAGCACTGCCCTTGGAAGCAGCCTAAAGGAGCCTGTCCTCCTCACYTTGGCAGTTCTGCT
15987	4	62.3037	11	T	C	TGCAGGCTGGYTCTTTGACCCCCATCACAAGGCCTCTGCTAAAGAGGCCTCAGCTGGAGAGTGCCATGTCCCAGCTAGATCTGCTTATCAGTGCAG
11664	4	62.3037	44	T	A	TGCAGGGTCTTCCTAGGGTGGAAAGTGAAGAGTGGCTCAGCACWGACTGCTCCCCCTCAGTGGTTGCCGCCCCGTGCATCTCCTGACACTGACATG
11563	4	63.3849	17	C	T	TGCAGGCCCCATGCCCYACCATTACACAGAGATGATCGAGGTTGATAACACTGCCTGCTTCCACTCACATGACAAAAGCCAGGGCAGCCAGTGAAC
14495	4	63.3849	84	C	T	TGCAGGCCTGGGAGCTCACGGAAGCCATGGGGTACTAACTGGAGGACACTCTGTAGGCTAGCCAGTGATAGGTGGGTGAGGCCYGCCAGCCCCATG
8338	4	63.3849	19	C	G	TGCAGGTTTGCCCCACATSAGAGAAGAGGCATGAGGGGACTTCCTAAGGGGCTGGCTCGCACAACTGGAAGCAGAACAGTCTGTGCACCATGGAGG
1215	4	63.9225	30	T	C	TGCAGGTCTGAACCCAAGGAGCTCTACCTYGAGAGCACAAACTCAGGATCCCTCCTCCCTCAGAGTTCTCTAGCCACTGGTCATAGGATCATTCCA
7347	4	63.9225	29	G	A	TGCAGGCCTCGCGCAAGTTGCGCATCCARCGCTGGATACCACGGCGGTTAAGATAGAGCACCATGAGGAAGATGAGGCCGATGAGCGCCAGCACTA
1705	4	63.9225	34	T	G	TGCAGGGCTACTCAGACCTGCCCCTTGCGGTAGKCAGGCCCTGCCACTTATGGATGAAGAAACAACACCACAGAGAGGAAGTGACTTGCCCAAATG
5480	4	65.0036	45	T	G	TGCAGGGATGTGTATACTCCATTGGCTAAATGAACAGCTTCAGAKGCTTCCACTGGGTTGGGAATATCCAAGTCCTGTGGTACTAGGTGGCACTGC
12819	4	65.0036	29	G	A	TGCAGGAGACTGCAGGCCCTGAAGTCTCRGACTGTAGATGAGAGATAGGAGGACCCAAGGCTGGTTAGAATGCACTTTCACCAGCCAAGTTGCCCG
15409	4	66.1048	50	T	C	TGCAGGCCCCACCTCGGAGTGGCGAGACTCCAGTAACCCCTTTCGGAAGYCTCCCCAGATATCCCTCCATTACGCTCCCAGGCGGCCGCCACGGGG
2787	4	68.3228	39	C	T	TGCAGGGCCAGCTGACAGTCTTCAATCAGGCCCTGGACYAGGTAGTATCGGGCTTCACCCAGCAGCTCCCCGAGTTCTCTAGTACTCTCAGGCAAT
2446	4	68.3228	88	C	T	TGCAGGGTCAGAGAATTACAAAAAAATACAGATTGACTGGGGGTCTGGAAGATCATTTGGTCCATTAATTGTTACACACTTCTCTCCYCCACTCCC
6879	4	68.3228	21	T	G	TGCAGGGCAGGAGGGCAAAGKCAAGCAAGAAGACACTTCAGAAACTCTCTTTATCACAGCTGTCTCCCTAGGGAGCTGGCCTTCAGAGCGGCCCTC
16411	4	68.8604	67	T	C	TGCAGGGGGGGGGGCATCTAGATATGTGAGCCTCCACACCAGCTTTGAGGACACCAACTCTGAGAGYCATGGCAGGTTGATTTTACCCACACACCC
15005	4	68.8604	16	A	G	TGCAGGACATTGAAGRGAGCCAGGAAAAGGCACACAGACCTAAGGTGAGCTCCAAATAGAAGGGCATGCTCTTGTCTGGGGTCCCCCACAATAGGC
2691	4	68.8604	87	C	G	TGCAGGAGGGGAAGGGCCCTGTTTTCATCTGACAAATGAAGTCACTGGCCTGGAAAATCGCTAAGATGCCTCCTGGGGTTTCTACASGGACCCTCG
5746	4	71.6084	50	G	A	TGCAGGAGCACTAAGAGAGGTAAGCTGGCTCGAGGATGCAGCTTTGTCARCAGATGAAACGAGCCCTATTTTAAGCCATGCTGTGTACGAGCACTT
5682	4	74.4215	25	G	A	TGCAGGGCAGGGGAAGTGACCATARGCCAAGGAAGACAGGCAGCCAAAAGAGGCAAAGGGTGGGATTCTAGGAAATATAGCCTTGCTTATACCTTA
9560	4	75.0006	58	A	C	TGCAGGAACTGTGAGCCAGAATTAAACCCGTCCTCCCTCAAGTTGCGTCTAGTCAGGMTTTTGGCCACAGTTACAAGGACAGAAATGAATAAGAAA
1704	4	75.0006	31	C	T	TGCAGGTGGTGCACAGTGGACGCAGGGCCAYGAGAATGTTGAAGCCAGTAATACAAGGGAGAGGTGTGGGCTGGGCCCAGAATCATATGGGACAGG
14279	4	75.5383	50	G	A	TGCAGGAGTCCAGATGTGACCCTGTGCTAGAGACACCTCTGTCCTGCTGRATGCATGATGGACACTCACCTCTGGGGAAGGACTGGGGCTGGTGGG
12720	4	75.5383	62	C	T	TGCAGGTTCAGACAGACACCACCCCAGGCAGCAAGTGTGCCTGGAGCCTGCCAACTTGGACYAGAAGGCTGTGGGTGTGAAGATGCTCCACCTGAA
3676	4	76.0732	52	G	T	TGCAGGACACAACAGGTCTAGTTTCTGCATTCACTGTGAAGCCAGCACCATKCTGTGTGCAGTGATAAAAATCATCATATGTCACATTTGTTCAGA
2705	4	77.1572	29	A	C	TGCAGGTTGTGTGTTCAGCCTGTAGGAGMTGCTCACTAAATACTCCACAAAAATGGCTATCCAAGGCTGATGTCACAGCATCAGGGACCTGCTCAG
6743	4	77.1572	11	G	A	TGCAGGAAGARAGGTATGGTAGGTCAGCAACGCATAAAAGGAGGCAGGGGTGGTGAGGCTGCCGTCACCCTAGGAGATGAGGAGGTCTTTGGTCTT
15186	4	77.1572	76	C	T	TGCAGGGCTGGGGCCTGTTCCTCGGGCCAGCTGATGGTGATGTCATCTTCCGTTAGGAGGTCCCCCCCTCAACTCYGTTGACTAGGGACTTAAAAA
5112	4	77.6948	87	T	A	TGCAGGCTTTATGTGTTTGTGTTACTTACGTAGCCTCTTTTGACCTCAGCTTCTCTGACCCTTTCCCACTTGGCTAGTAACTGATTWAGCGGGACC
2180	4	77.6948	50	A	T	TGCAGGCCTGAACCAGGACGGGCCTCACCGTGCCGCTGCTGAAACGCACWGATACCCGCGCGGGAAGCGATCCGCCGAGAAGCTGCCGTGCCGCTA
2058	4	77.6948	81	A	G	TGCAGGGAGATGCTGAAGGACCCTTTTGTGCGCTCCAAGTTCATCTCACCGCCCACCAACTTCAACCACCTGGTACACGTRGGCCCTACGGATGGG
1002	4	77.6948	78	C	T	TGCAGGCCGCTGGCTTTGGGCCCGCACTGAGCAGGGATTCCCAGAGGAACCAGAGCAGCAAGAGGACCAACAGGATGYAGAAGAGGATTTCATGAT
10966	4	78.2325	21	C	T	TGCAGGTTTGTGATCCTGTCYGTGGTGCTCTTCGGCCTGGTCTATAACCCACACGAGGCCTGCTCCCTAAACCTGGTGGACCACGGCCGCGGCTAC
8651	4	78.7701	35	T	C	TGCAGGTTCCATTTTGTAAGTCATCTGCAACTTCYGCATAACCTCTAGGTACCTATCAAACACCTTGAAGACAATAGCCACCTGGTCGTCTACATG
2940	4	78.7701	82	T	G	TGCAGGGAGGGGCAGAAGGGGAAGGTGAGCTCTAAGAAGTTTTCTGCCAAAGCAAATTACTGCTATTTCCTTCTCCTGTAGKGATGTCAAACTCCC
13720	4	78.7701	81	G	T	TGCAGGGGAGGGGAGCGTACAGAGCTCCGCGGGATGAGGCGGGGGCTTAAGGAATGAGGCCTAGCTCGCAGAGCACCCCTKCGGCCTGGATGAGGG
12463	4	79.305	85	T	C	TGCAGGCAAGGTGGGAATTTGAAATGAAGTTGCGGTTTTGTTAAGATAAATATGCACTCTTCCTCCCAGCCCATGTAGGAAGTAYAGTTTGGGTAA
14414	4	80.3776	42	A	G	TGCAGGAGCTCCCCCTCTACAAGAAGGGAGCAAAGTACAGARCCTGCCCCATCTCCTGCCACATTTGTCAGCTGTTCACCCACTTTCTGGCCATTC
5379	4	83.6818	31	C	T	TGCAGGATGTTTCACTCATCTGCCATTCCCYTTGGGGTAAATTTTCTTATGCAAGAGCACCCACCACATCTCTTCTTTCCATATTGACATCACTGC
11544	4	91.7812	73	G	T	TGCAGGGGCGACAGCGTAGCTCTCTCTGGCCGCGGTTCGCCTGGAGAATGAGGGGTCTGCGTGATCGTAGGCKACTTGTCAAGGGCACATCAGCGG
10301	4	92.8384	24	T	C	TGCAGGATTACCTTTGCAGAACAYTATAAGCGGTCATTCTTAGCTTGTGTGTGCAAGACCTCCAGGAAGTTAAGGGAAATTCAAGCAGCATCTCAG
3441	4	94.0491	33	A	T	TGCAGGGTTTTCTGTCCACAGAATAAGGCTGAWTATGGGAGGAAGCCTGACAAAGACTGGCCTGTGCCAGCCAGCACTCAGGGGCGGCTGTTTGGG
10065	4	99.7821	25	A	G	TGCAGGTCTAGGAAGCCAAGGTGGRACCAATTCCAGAAGGAAACATTTCCAGGCAGGACACTGACAAGTCTCAGCTGTAGAAGGCACAGGGATCTA
11581	4	102.489	66	G	C	TGCAGGGAGACCCCAGCAAACTGAGCATGCTCCCCAGCTCTGACCTACTGAGCCAGAAGTGTCTTSGCCTGCGCAGAGCTAGCCTAGGACAGCAGT
5294	4	102.489	65	G	A	TGCAGGCAGTCACTGTGTAGTAGCATCACATTTTGATGTGCTAAAAAGATGCCTATAACTACAGRGTTTGCATGTACAAAGCTTTGTCACATACAT
15427	4	103.015	88	A	T	TGCAGGTCAATGCGGAAAAAGAGGTAGAGAGAAACTGACAGCATCAAAGCAAACGTAGCTCCCTCAGGCCCTGTGCCCTGTGCCCTGWGCCCTGTG
9251	4	105.787	14	C	T	TGCAGGTTCACCAYGGCATCAAGGGAATGGTGCTGGATGAGAACTCCAACAACCTCACAGGGGCTGTCATTTCTGTCAGTGGGATCAATCACGATG
15247	4	106.32	35	C	T	TGCAGGGTGGCAGGTGTGAGGCAGGTCCTGGCTGYTCTTGGCTCTGGATCCCGACTAGCAGAGGATCTCTAGGATCGCTGGAGGCACATTTCAAGA
2684	4	106.941	35	A	C	TGCAGGCTTGGTTGGGCTGACCCCAAGGGGACTTMTGCTTGGTGTTACACACTGGTGCTGGCTGCTGGCAAGAGCACCCTGGCTGCATTAGTGCCA
6237	4	110.28	60	A	G	TGCAGGACTGTGTGCCCAGCAGTGGGGGCCCAGAGAAGCAGCAGAGATCAAGGGTGATGRTGGGCGGAGTAAGACTCCGCTGCAGGTCTCATCCAT
13166	4	110.28	71	G	A	TGCAGGGGCACGGGGGTCCAAAGCAGCCATGAGGTCCCACACTTTAATTTTTCTAGAGAGCAAACAGGGGRCAGAAGTCTTAGTTGAAAGCAAACT
13372	4	110.743	88	A	G	TGCAGGTGCTGACATCCATGCAGAGAACGAGGAGCCTCTGTGCCCTCTGCCCTCACCCCCCACCTCTGGGAGCGACTCTGACTCTGARGGTCCTGA
2929	4	110.743	62	G	A	TGCAGGTCACAGCTGATGGCCAAGGTCACAACGACTTTTCTGACAAGAACATGAATATGCCRAGCAGGCTGAGCCTTTACATGAGGCTTATGTAAG
2993	4	110.989	80	T	C	TGCAGGCGTCACAGCTGTGTGCCCTGCCTGGGGAAAGAGATCTCTAAGAGTGTTCTTGGGGGCTTTCCTGTCATTAGGAYAGTGCCTGGCACATAG
1709	4	113.571	12	C	T	TGCAGGGTTGAYGGTGTACAGCGATGTACTGAGGCATAGAGCTGCTCTTGGGGACACCTCTGATGAAGCCCTGCCCTTTCTCCAGGTGACTAGAGC
2244	4	114.449	23	A	G	TGCAGGTCGGAAGGGCAGCTGARGCTAATGTTGGTCTTCACTGACCACAAAAAGACAGACAAGCCCAGGAAGGCACGTGAATGAAGATGGGGGGAT
1245	4	116.364	24	A	T	TGCAGGTTTCCTAGCAGAGAGAAWGACGTTGGGAGCAGCTTATGCAGAAAGGCACTACTCTGGCTGTGGGGTTTCTACTCACAGTTTGCCAGCCAG
2069	4	116.364	15	G	A	TGCAGGGATGAGTGRAACATGTCCCGTGTTTGGCACAGAGGAGATGTCTGATGGGGTGGGCATCCCTCCCTCTGCATGAAATTCCAGCCACCTGGA
10320	4	117.447	36	A	C	TGCAGGCTGCATGTCTAAGGTAACCTTCAGTTTTCMCTTTTCCCCATTGCAAAAACAAAAAGCAAAAGCAAGGCTTCCTATGGAAAAGTTCGGGTA
9075	4	117.997	89	C	T	TGCAGGCCTGGGGTGCTCAGGGGAGGACTCGGGAGGGAGAACGTAAAGGGGGCGGGTGGTGCTCCTGGCAAGGAAGGCACCGCAGTTCYGCAGCGA
7259	4	119.653	59	T	C	TGCAGGCTCAGCAACGCAGTGGAGGAAAGGCTGGCTGCTTTTGAGTTTTTGATCATTGYTTTTCATTTCTTTTCGGGCCCTGGAGTTTTTATTTTA
16229	4	119.653	49	A	G	TGCAGGGAACGACACAAGTCCTGAGAGTTTCCTTTTGCACAACGCTCTRGCCCGAAAGCCAAAGCGGATCCGAACCGCCTTCTCGCCGTCCCAGCT
15791	4	119.653	14	G	A	TGCAGGTCAGACARGGGCACCAGATCTCATTACAGATAGTTGTAAGCCATTATGTGGTTGCTGGGAACTGAACTCGGGGATCTCTGGAAAACAAGC
6663	4	121.348	70	A	G	TGCAGGGGAAACAATGAGCTTTCTTCTGTGGAACTTCCATGGGCCACACATACTATCTCCACAGGGAGARTCAGTATCTGACGGTGGAGAAAAGGG
15642	5	0	51	T	C	TGCAGGGACCATCCACCAGCACCCAACAGGCACAGACCCTGAAGTGGTCAYCTGCGACCACCCAGCCAGACAAGGTCCCTGCAGTGGTGCCTTCCT
1483	5	0.581427	25	A	G	TGCAGGTGTCAGTGGGTGGATGGGRCCACAGGGGCCCCAGCAAACCTAGGAGTGGCCTGGGTCAGCCTTGTCTTCCCTCATGTTTGACCTTGGGAA
4310	5	1.11357	18	C	T	TGCAGGCCAAAGGTGCCYTGCAGAGGAAGCCATTCTACGTGGCCTTCAGCTTCATGTATATCCTGGTGGGGCTGACCGTCATCGGTGCCTTTCTCA
5079	5	2.1975	30	A	C	TGCAGGCCTGGTCCCGCCTCCACGCGAGCMCCAAATAACACTCAAGAAACTCTGTATTTAATACAAGCTGTTGGCCACTTATATCATTGTTTATTG
6914	5	3.30143	27	A	G	TGCAGGATGGAGGGTAAGAAGAAACARCTTAGGTTCAGACACACGGGGGTCTCCTGGAAAGAGCATCCTTCCCACTATCACGAGCACTGTTAGGTG
16503	5	3.85631	65	C	T	TGCAGGATGGGAATGTTTCAGTCTCAGAGGAAACTGTTACACAACTGTCATGGCCAGTGTGATAYTTTTGAGAGGTGAAGACATTTGGGGGTCCTT
9951	5	4.39378	17	G	A	TGCAGGGAGATGTAAARTGCACATGAATAGGCAGCTACACTGCTTGGCTTGAGCATCACATCTGATTAGTATAGCGAGCGGGTGTGTTTGTCAGAC
1327	5	4.39378	11	T	A	TGCAGGTATCWTGAAGTGTGTTGCCCTGTTATTGAGGATATCAATTTATCAACAGGGCCATGTCACACGGCTCTGCACCTCCACCCCTCCATCCCA
8900	5	7.71639	69	G	A	TGCAGGAATAGGAGGAATGAATAGTGAGGACTGAGAAGGTGTAAATATTCTGGGAGGGGAGAGGAGACRAAGGGGAGCCTGGGAGATGCTGGAATA
1710	5	9.89431	31	G	A	TGCAGGCCATGTGCTGCTCATGACTGGCTCRTACCCTGCTCTTCCACAAAAGCTCAGCCCAGCCCATGGCTGCTAAGCTGGATGGTGAGTAAGCCA
6205	5	12.6575	60	C	T	TGCAGGTGATGGGGTCCTTGTCCCACCAACAAAACAAGATGCCTCTACAAGGTGGAGAGYCTTAGGCTGATTATTGCCCCTTTGTGTCCTTACACA
9196	5	13.1668	18	G	A	TGCAGGGGCAATGATTCRTTTCCATGATTGTATTGATGAGTTTTTCTTCTTTGCAGAAAAGGAATGTTTGGGCTGAAGCTGAAAAAGAAGAAGAAA
5813	5	17.0942	19	A	G	TGCAGGCTTTGGCAAGGARTTTAGATAGACAGCGTTACAAGGCAATGGAGAGCAACCAAAGAGTTTAGAGCAGGGAATGACATTACCCGATTTACA
430	5	17.6148	85	G	A	TGCAGGGCTGCGGGCTCCGACTTTACCCGCAGTCAGCGGCGAGAAAGTGGCCCAGACACCGCGGTCTGGGCGAGCGCTGAGCTCRCTGGCTCGCTC
12369	5	17.6148	74	A	G	TGCAGGCAGTGAACACCTTCCCCGCCGCGGTGGACCACCTTCAGGGCCTGTACGGGCTCAGCGCTGTGCAGACRATGCACATGAACCATTGGACGC
12910	5	18.1776	12	G	A	TGCAGGCCCTCRGAGAGCAGCAAGGGTTTGTCTTTTCTTACCAGGTGGGCTTTTAGTCCTGGCGTAGCACAGGTGGTAGGTAGCCTTCGCAGTGAG
6238	5	19.849	74	G	A	TGCAGGCTGCAGCTTAGTAATGGCAGTCTTCCCCATGGCTCAGGAGGAAACCCTGGGGCCCGTGTGATTCCACRCTACTCTGTTCTCTCTCACACC
2406	5	20.5637	68	C	T	TGCAGGCTTCCTTCCGCTTGGGCTGGCCCATCCTGTTGCTCTGAGCCTGAAGGGTTGGAGCAGCTGGYCTGGGCACCTGCTGCAGCGCAGGAAGAG
16023	5	22.7703	61	G	T	TGCAGGATTCCACGCCCTTACAGACCAGCTTCAGCGAGATAGCAAGGGCGTTTAGAGAAAKCCACACTTAAAGATGTGCCAAATGCCTGTAACATA
6497	5	24.168	43	A	G	TGCAGGTGTCTGTTCTCGGGGCACAGTAGGACGCCAGCTCCCRCAGCCCGAGAGCCCGCGGCGGGGACGCGCGACAGCGAGGGGGTGCACTGGCAG
1296	5	35.6592	45	A	G	TGCAGGAAAAAAATAGCTTCGGGTTTGCATTTTATGGAAATGGCRGATATCTGAGCAAGGTTACTTCCTGGGAGCCAAGACTCTCTTTCATGGTGC
14662	5	36.1389	49	T	G	TGCAGGCAGAATTCACACACAGTCAGTGCAAGGGCCTGCTTAAGGGCCKCCCTATCAGCCTTCCATGCAGACATCTGGTTGAATTAAGGCCAAATG
10448	5	37.2387	20	T	C	TGCAGGGTGGCAGCTTTGAYGTGGCTGATAGAATGTTCCACAGCGTGAAGAGCACATGGGAGTCAGCCTCCAAGGAGAACATGAGCGATGTCAGGG
7283	5	37.7865	61	G	A	TGCAGGAATGACACCTTGTGACCAGTGGAATCAGAGTGGAGACAATGTAAGTATCTTCCARGGTAGGACATTTAAATGTGGGCAAGAGACCCCTAC
674	5	37.7865	28	A	G	TGCAGGTTCATGCTTTATTGTCAAGTTRAAAAACAAGCTGTGGAGCCAGGCACAATGGCCAATGCCTATAATTCTACAATTTAGGACACAGCAGAG
15138	5	37.7865	22	G	C	TGCAGGCAACAGATCTGCAGASAAGAGCCTGAGTGCTGGACACATGGATGGTCTCTGTCTGACCCACAACACCTTCCAAATCAGATCCGACCAGGA
11872	5	38.298	93	C	G	TGCAGGGCGAGGCGGATCTGGTCATAATTCAGGGGCAGAGGGTGAGGCACGTCCTCCATCTCCTCCATCATCTCTTCCCCAAAGAGGGCAGCSAGA
10901	5	43.9973	50	T	C	TGCAGGTCAGACCTGGTTCTGCTTGTTTTGCACATAATTTTCACTGGAAYGCAGCCACATCCATCCATTTGTCTAGCATCCCTGGCTTCTCACAGT
11970	5	47.3017	36	C	A	TGCAGGCTGAGTGATGAGTAGCTACCTCCACTGCCMGCCCCCACACCAGCCATGCGGCTATAGTGCCTTAGAGAGCCTGGGAAACACTGTGATCCA
7999	5	47.3017	20	G	A	TGCAGGCTCTCTTTGCACCRCCCTCCCTTTGGGAAATATTAAGATGCATCTGAGAAAGCATGCATGTCCACATGCTGGACACCCTTCTTATTCCTT
7304	5	48.3883	32	A	C	TGCAGGCTCACAGCGCCAAGGGCAGGGAAGGMCTGTTAAGATTTTCCCAGGAGTTTCTTGAGTGAGAAATAATTGCCTTCTAAAAGGTTGCAGCCA
16563	5	48.3883	61	G	C	TGCAGGAGGTGCATGTCCCCAGACCACCAGGAGGTTCCCTTTTCCGTCTGAACTCCCTCCSAGACGGTTCTGCCTGCAGTCTGTCCTTCGGATGGG
12894	5	48.9205	60	T	A	TGCAGGACCCACAGTGTGAGAAACCACTGCAGTGTGTGGCCAGCCTTTCCCAGCCCTGCWGCGCCAAGTTCCTGCTCAATGCCAAGCCCCTGCCTC
15307	5	49.4581	81	G	C	TGCAGGGGCCACATTACCTGTCAGCTCCTGGACACATTGCCCTAGCTGCTGCCTCCATCAACGTATGTGCTATCTCCGAGSTGCTGGATAGGCCCC
15773	5	49.4581	29	A	G	TGCAGGTGTGTTTGTGTAAGGATGTCAGRTCCCCAGGAAATTGAGTTATAGACAGTTGGTAGCTGCCATGTGGGTGCTGGGAATTGAACCTAGGTC
12037	5	49.4581	53	T	C	TGCAGGGCCTGAAGTACACATTCTCCGTGGACTGGTGGTCCTTTGGGGTCCTYCTTTATGAGATGCTCATTGGCCAGTCTCCCTTTCATGGTGATG
13342	5	49.4581	59	A	G	TGCAGGTATCTGTTGCTGGGAGGTTAGGAGGTCAGGGCCCCCAGAGGGCCTAAGCTGCRTAGGAAGGAGCATCTCCACAGCCTGACTGAAGTGGTG
8911	5	49.4581	26	G	A	TGCAGGCCTTCCTTGGTGGCCACTARCCTGGAAGTCCCAGGTACTTTGTGAGAGGGCAGGGAATAAAACAGTGAGCTTAGGGATGGTGGGAGAAGA
4694	5	49.9958	61	C	T	TGCAGGAGTTGCTGCCTAGTTACCAACTTCACCAGGCGATGGCCAAACATCCCTGGACCAYCACAGCCCTGACCCACGTCCCAGCTGCCCCCAAGA
8837	5	49.9958	11	C	T	TGCAGGGTGCYTCTCGCCTCGGGGCAGCGCGGGGTCCCTTTTATTCTATAGTTTCCATTTGACTTAGGTCAAACGGTGCTGCTATGCCTGTTCCAT
15145	5	49.9958	49	C	T	TGCAGGGAAAGACCCTGTCAATACCTAGCCCCTAACTGTGGCCCTGCCYAGACTGGCACAAGGTTCCTCGTCCTGATCTCCACAGGGTAGCTATGG
10781	5	49.9958	72	T	C	TGCAGGGCCACCTAACAAGCAGACCCTGTAATAATTTAACATAAGCACTTACAAGTAAAGAAAAGACAGACYAACTAGTTAAATTATTGGAGGGAG
1946	5	49.9958	20	T	G	TGCAGGCCTGACATATCTCKGAAGGCTCTGATTTCCTATATGTGAGGCAGGAGGAAGAGGCTCCAAAAAGGCCCCAGAAAATCTGAGTCTGGAGAT
7487	5	50.5335	67	A	T	TGCAGGCCAAAGTCCAGAGGGAATGGCAACAGGAGGTGCTAAAGAAGTTTAAGGCTTTTGTGGAAAWGACCTTCCAAGGTGTGTGATGGTGCTGGA
3275	5	50.5335	71	G	T	TGCAGGAATCCCCTCAGGAACTTACTACATGTCCAGGCCCATTAAAGTAGAGCTGGGTCTTTTCGTTGGGKTTTATAATGCTCTTGGGTGACTCCA
4514	5	51.6146	23	C	T	TGCAGGAGGGCAACGAAGTGCCYTGCTTGTTACCATGAGGCAAATTGCCCATGTCTTCTGTCACCACAGACATTAGCTAGGGGGTGGAGAAGAGCA
6470	5	51.6146	16	C	T	TGCAGGTTCGCTCTGYCACTTTTTGTGTTTCTCAGCCACCCTGCACCTCACAACCCCTCAGTGAGAGACCTGAAGGCAAGCTGACGCTCACTTCCC
16073	5	53.8008	35	A	G	TGCAGGAGCCAGTTCAAAGGACCATCACTGCTGCRTTGGGGGCAGGGAGAGCTTACTGGTTCAGTACTTGTAACCTTGGCAGAACTCCCAGCAAGC
8621	5	53.8008	72	C	T	TGCAGGCCATTCTATGGTCCCCATTCATCCCTTCCCATACCAGCAGTTTGATACATTGTTTTCTGAGGTCTYCTGGTGGCAGCTTGCACCAAATGC
3044	5	53.8008	81	C	T	TGCAGGCAGCAAAGCCTGAAGTCCTGCCAGGAGGTCACTAAAGGGGTTTGTCAGAATTCCTAATTGCAGATAACAGACTCYGCTCGCCTCATTTAA
3961	5	53.8008	35	C	T	TGCAGGCTGGGTGGTGGTGGCCCACACCTTTAGTYCCAGCACTCAGGAGGCAGAGGCAGGAGGATCTCTATGAGTTCGAGGCCAGCCTGGTCTACA
4538	5	55.4371	89	G	T	TGCAGGCAGGCAGCCACTCTCCTGCCCTGAGAGTCTGGGCCCAGGCTGTAGCCCCTGCAAGCCTGGAGGTCATTCAGTATGCTCAATTKAGAGAGT
11791	5	55.9693	87	T	C	TGCAGGCACCTGAATTAGTTGTGTGGCTTAGCACAAGCTTACTGTGTGCTGGGCGGCAAGTTCCACTATGGCTTGTTGGGGCAGCAYCAAGGACAG
5207	5	56.5066	13	G	T	TGCAGGTAAGGGKCCATGAGTCTTGGGACTAGGACTAGAGGCATACTCAGGTGGTTGAACACTCTTGACTCTGTTGTTGCAGCGTGTGGGACACTT
16319	5	56.5066	22	G	A	TGCAGGGCCAGGTAGGGTCAGRTGGGGTGATTGCCCACCCACCAGGATTCAGCTCAGCAGCCTCCAGCGAGCTAGCCCATCCCAGCCCTGCCTAGG
14823	5	56.5066	47	G	A	TGCAGGGCCTCAGGGTGGCAGCTGCACACGCACCCTTTGGGCTTTGRAGACCACAGGCAAGCGCAGCCTGAAGTGGGGAACCCCACTTCTCCTTTC
3115	5	59.784	31	C	T	TGCAGGGGATGCAACTACATAAATACACCAYACCCAAGCTATGGCAATTAGTTAGATAATTTAATCACATGCTTGCTAGTTCCCCATCATCTGTTT
15088	5	59.784	45	A	G	TGCAGGTCCACTGTAATTGAAGAATGGCATTGGAAGGTGCTGTGRGACTTCAGGGAGCCAAGGCCTCCTGGGTCCTTGGGTCACTGGTTTATGCCT
13019	5	60.8309	57	T	C	TGCAGGTCCCTGAGCTCCTCAGAGTGCACAGAATGGTGTCCATTCATCCCAGCAGTYCCCCCATCTTGGGTCAAGCCCTTGTGTGAGAAAGTTGTG
13101	5	61.366	11	A	G	TGCAGGATATRTGATACAGAATGAACCTGAGAGAGCCCAGAGGGCTTCCTGGAGGAAGATGGCCTGGGCTGGGTCTTGATGGCACAGATGGGATGG
573	5	61.366	13	A	G	TGCAGGTGAGGCRGCCAGTGCCCCTTCCCTGGCTCTTTGTGTGGCCAGGAGTTAACTGTGGGGACCTTGGAGGGCTGGATTCTAGGCCTACTTGGG
11569	5	61.366	15	T	C	TGCAGGCCTCTTCTYTGGGAGTGCCTTTCTCTGCAGATTTCCTGTTGGACAACGGAGAGCAGCACTCTGCCAGATGCCAGCAGGTCAGGCTCTGAG
13389	5	61.366	77	C	G	TGCAGGGTCTCGGTGCGGATCCTGAGCTTCGAGCTCAGCGGGAGCGGTTCTGCGTGGCGCCCCGCGCGCCTATAAGSAAAGCTCCGCTCCCCACCA
5194	5	61.366	35	C	T	TGCAGGCTCATCAAACCTTGTTTTTCCAGGAAGCYTTGTTGTAAATCATCACTTTCCTACAGCAGGCCAGGATTTATGGTCCCACGTGTCATTCCA
8143	5	61.366	48	A	T	TGCAGGGCCCAGGTCAGGGTCAGAGGCATCTAGGAATGTCAAGACCGWCCCAAGGGGCAGGTCCTCTGGCACCTTCAGTCTACTGTGCTCTGTGAT
14028	5	61.9009	56	T	C	TGCAGGAGCCCATAAGTGTGGATTGCGGTCACAGCTTCTGCCTGCGGTGCATCTCYGAGTTTTGCGAGAAGTCGGACAGCGCGCAGGGCGGCGTCT
14758	5	62.985	21	G	A	TGCAGGTACTGCAAAGGGCARCATCCCTCCTGTTGCACCCTAGATACTTTGGCTGCCTAGGACATACTCATCCTTGGTATGGGAGGTGGACACCTC
5812	5	62.985	32	G	C	TGCAGGTTCTGCCTGACTACCTGAAGGGCCTSTTCAGCAGCGTGCCAGCCAGCCAGCCCAGTGAGCAGCAACGGCGGCAGGTGTCCAAGCTGGCCT
15222	5	63.5228	17	A	C	TGCAGGCTCCCTGCAGMGTCACTGGTGGTGGGCCCAGGTTGACCCGCTGGGCTGGGGAAGCTTGTCTTAGTGAGCGTTTCTGCTGTTGTGATGAGA
6202	5	63.5228	54	T	C	TGCAGGGGCCGTGGGTACTGGATATTCCTGGGGCCAGCTCAGACAAATATCTGYATGCCTTCCAGCCCAAGTGAGGATAGGCTGCAGATGGAACCT
4907	5	64.0605	88	T	A	TGCAGGCAGGCAATGGTCTCCCATACCCAGGAACACTACACGGAGCCTGGGTCCCATGCACAAGATGGCTTCAAAAGGGCTGTCCCCWTACTTGAA
5591	5	64.598	12	G	A	TGCAGGGGAGGRGCAGGAGCGCGGTCCTGAGGCCTGACGTCACCCTGGAGCTTCAGGGGGTGGGAGCCGCCGCTGTGCGGCTCACCTGCAGTGGGG
2927	5	64.598	69	C	T	TGCAGGCGGCTGGGGAGCGAGCGGCCAGCCCTGGCCGTCGCCGCCTCCTCTTCCTTGCGGTCTTCGCTYTCTTGCAGCGGCGGCTCCGCATTCATC
14309	5	69.0709	54	A	G	TGCAGGTGACCTGGCAACTGGCCCCTTCCTGAGAGACACTGTTTCTTAGTGAARGGGGGATGGGCCAATCTCCCAGAGGACAACTGCACCCATGCC
13248	5	69.0709	16	C	T	TGCAGGTGCTTTGTTYTTCCAAAGGTCAAGACTGTCTCACAGACTGCTCTTCCTTCTCTTTGGGGTCTCAGGAGTGCTGCCCACTGATGAGGAAAA
10731	5	69.6151	59	A	G	TGCAGGTTCCTAGGGAAAAGAAAATTCTCATTGCCTTTTGGATCCAGTTTGAAAAGAARACGGAACAGAAAGGAGCTGCAGGTGCCTCTGCAGAGG
1023	5	70.1593	91	G	A	TGCAGGTAGTGGGCAGCAATCAGTGACAGGTGTAACCTCTGTGGATGACAGCAACAGTTACTGGAGAATACGGGGGAAGACTGCCACAGTRTGTGA
3416	5	70.1593	15	C	T	TGCAGGGGAGTGGGYGGCGCCTGAGGATCCCAACTCCACTTCTGGTCTCCCACCCTCACAGTAACGAGCCCATTGGCAAACTGACCTCCCATAGGA
14358	5	70.7471	40	G	A	TGCAGGGGAGTGGGAGGTGGCAGGGTGGTGAGGGGTGATRTCTGCTTTGGAAACCCTGAAGACTCTAGAAGCAAATGCTATTGCCCTGCACATGAA
8210	5	77.1491	43	T	G	TGCAGGAATCGGAGCCCAGCCTGATCCCAAAAGGAGAAATGGKCCAAGACAAAGGCAGCTCAGGCAGGCCCTTCCCTGCCCCCTCTCCGCCTGCCT
824	5	78.2032	35	C	T	TGCAGGCGGGACCCGTCCACGTGTCTGTCCAGGCYCTCACCAGCAGGGGCAGCTCAGATCCTCTGCGCTGTTGCCTGGCTGTGGGGGCCAGGGCTG
8104	5	78.2032	67	G	A	TGCAGGAGCCCTCATCCTCAGAGCCCAGGCTCTGACTGAGACTGACAAGTGTATTCAAACATCACCRTGTCCTCCTTGTTATTTCCTGACTGTTTC
6394	5	78.2032	27	G	A	TGCAGGACGGTAACCTTGATCTTCCTRCCTTCCCTTTCAGAGCGCTGGGATTATGGGCGCGTGCCACAACGCCTGGGTATTTTGAGACAGGGCAGT
13424	5	78.2032	33	C	A	TGCAGGGGAGGGTTCCCCCAGCCTGCTCTGTGMTGCTCCAAAGAAGTATTTGAGCTGTTCTGATCCTCTGGAGTGTAACAATTCTGTTCCAGCCGA
5436	5	83.8606	68	T	C	TGCAGGTGCCAGGGTTGCACCGCACAGCCAGTGGCCGAAGCTCTACCTCTGAGCACCAAGACTGCAAYGGCAAGTCAGCTTCGGGGCGTTTGGCCC
15246	5	83.8606	11	T	G	TGCAGGCTGCKATGGCTCTTTTTCCTCCAGAGCCAAGCTCCTTCTCTGGGCCAGAAGCCAGGTTTCTCAGGCAGCCCCCACTTCCTGCCTTGTCTA
4892	5	84.9521	28	A	C	TGCAGGTCAGTGCATTCCCCCGTCCAGMCTTGAGTACGTTGCTCCTTCCTACAGGCCCCAAAACAACGATTCTAAGGCCAAAAAAGGGTCGGCGAG
12334	5	85.4879	14	G	T	TGCAGGGAAGGCCKTGAGTCCATCTCCTGTCTAACACCTGAGCTGGGGAGGGAGGGGTGCAAATCCCAAACTCCCACCTCACTTGTCCTCGCCCGT
803	5	87.1243	81	G	A	TGCAGGTGGTCCTCCTGCTGGGGTGGAAGGGAGCAGCCTAAGCCGCCACAGGAGTCTAGGCCATGTGTAAGGATGAACACRGCTGCTCACAGGTAC
2256	5	87.1243	78	A	T	TGCAGGGAGACACTTACTAGCTCTGAATCTTGGGGATACAGCCTGTCCCCGCACAGGCTGAAGCTCTCAACCTCAGGWCCAGCCAACAGCCTTTGG
13969	5	88.1941	36	A	T	TGCAGGAACCACCACGCCTTCCCTGGGGAGAACCCWGGAGGGGCAGAAGGGAGGGGTACAAGGGACGGGCACAAGGGACGGGAGGAAGGGAGGGGC
2358	5	91.5225	20	T	G	TGCAGGTCGCTGAGATTGCKCACGTGGGTCCCGCAGCACATGTTAGAATCAACACCCTCAATGGTAACAACTCTAACGGGCCCAGCATGATCATCT
10741	5	91.5225	37	C	T	TGCAGGTGAAGTTGACAACAGGACACTGATTGTAGGYACCAACCACCCGTACCACATCTCCCAGGCGGCACCTGATGAGTGGGGTGGAGCAGAAAG
7571	5	91.5225	61	T	C	TGCAGGTCAGAAGAGAGCACCACATCTAATTTTAGATGGTTGTGAGCCTCCATTTGGTTGYTAGCAATTGAACTCAGGAACTGCAGGAGAGCAATC
6616	5	92.0602	16	G	A	TGCAGGCAGCCTGGGRAGCGAGTCCTCAGCCTGCGCTCTGGCCCTTCCTCCTGCCCACCCGCCTGTTGGGCCCTGCTCCACCTTCAGCTGTCCTTT
447	5	92.5978	25	C	T	TGCAGGGCTGGTCTCCTATAAGACYATGCCCTATAAGAGGACACTGAGTGGACATCCCTATCCATGTCCAGACAGACAGCAAACCATGCCCCAAGG
1613	5	92.5978	42	C	T	TGCAGGGTCCTTGGAATAGGAAACAGGCTTGAGGATGGGTAYCTGCCCCCCTTGCAACCAAACATCTCCCACGTTGATGTTACAAAGCAGAGTGGA
13702	5	92.5978	11	G	A	TGCAGGCGGTRAAGGTCCTGAGGACAGCCGAGTTTGTCCCTTATGTGGTATTCATCGAGGCCCCTGACTTTGAGACCCTGCGAGCCATGAACCGAG
10107	5	92.5978	87	A	G	TGCAGGGCGCGCGTTCAAGGTCGTTTACAGGGTAGCGTCCGCTTCTGGATGGGGACATTTGTACATTCACTGTCTTTCCACGCTAGRCAGCCAGGA
536	5	93.1355	21	C	T	TGCAGGGAAGGATGCAGGCCYGATGAGTCGGGCAAAGGAAAGCACCACACCCTCAGCTTCAACGCCAGCTTGTGGAGATGACTGGGGATCCCACTT
9581	5	93.1355	17	T	C	TGCAGGTCAGCTGCCTYCCTTGGGATCAGTCCAGCCAAAGGGAGGAAGAATGTCTCTCAGATTTCAGCTTGGAAGAGGAGGAACTGAAGCTGTAAA
14775	5	93.6733	48	C	T	TGCAGGCTCAGGATAAGACACTGCAGCCTGGAAATGAATAATGAGAGYGATGAAGTTTTAGGGAAACTAGTCTGGGCTACCCAAATCTCCACCCAA
5421	5	93.6733	35	C	T	TGCAGGACACTTTGGGTGTTGCCTACTGCCTTTTYGTCCTGAGGCGGGTGCGGCTGCCCACACTCAAGAACTGCACCTCGTTCCTGCTGGCCCTGC
15037	5	96.4219	13	T	C	TGCAGGTTCCAAYTGATGCAAGCAATATGAGGGGTGGAGCCCCCCTCCCCCAAGTCTGGCTCACCATTAGCAGCCTAGTATTTCACAGCCTCTGAT
10986	5	96.4219	60	C	T	TGCAGGTCAAACCTCCTTATTGATTTTATTTCTCTTTAGTTTACAGGTACAGAAAGGGCYGCACAGAGACTGAGCCCATCATAATCCACTTACAAA
11253	5	96.9571	34	C	A	TGCAGGATCTGAGGGCTCCAAGGGGTGATGCCTMCCTGCCCGCCCATTTCTGTGGCTGTCGGGACGGCCCACCCCTCCTGCCCTTGCTTCGGTTTC
7771	5	98.0419	62	G	A	TGCAGGCTGGATGCCAGAAATGTCACATACGAAGGAAAACTAGTTAAATTAAGACAAAACCRATCCCGCCCATTTCTATTTCAATGTGGGAAAAAA
5399	5	98.5834	49	A	G	TGCAGGGTGAGGGTGGTCCACGCTTTTAATCCTTGCATTTAGAGGGGARGCAAGGGCAGGCAGATCTCTGAGTTTAAGTCCAGTCTGGTCTCTCAC
11126	5	98.5834	46	C	T	TGCAGGACAAGGGATCGAGGGAGACGCACCCCAGTAACCATTCATYCCCTCCCTGACACAGACGTCTTTCTTAGGCACTGGCACCTCTCAGACGCC
4282	5	101.921	17	T	G	TGCAGGGACTCCTCAGKGCCACGCATCACACACAGGTATGCGCTTTATTTTCTAGGCACAGTGTTCTCTTTAAACTAATTAACAAATGGTTTCTTT
15716	5	102.985	20	C	T	TGCAGGACCCTCAGCCTTTYCAGCATCGTCCCCATAGGGCCATCAAATGCCTGAGAAGGAGGGGTGGTTGCCAGGTTGTCAATCCTCACATATTCC
12879	5	105.199	11	G	A	TGCAGGGCTCRGCCTGCTGCTGACAGAGACCTGTCAGCCCTCGTGCTGGGTCCCTTCGGTGTGGGCATGAAGACACAGCAGAGTGCAGTTGAGGGG
11477	5	105.741	93	T	C	TGCAGGGTCATGGGGGCCCTCAACACTGTCGTGGAGAATCTGCATGACCCAGACAAGGTGTCCTCTGTGCTTGCCCTGGTCGGCAAAGCACAYGCC
14591	5	105.741	93	A	G	TGCAGGATTCCAGCCCTAGCCAAGGTGCCTGAGTTGGGGAGAGGGGCTCCCAGGAGCAAGAATGCCCCCTTCCTGCCAGTTAAGGGGCTTGGRTAC
7058	5	105.741	11	C	T	TGCAGGTGGAYTGTCTAGTGCTGCAGCTGCACCGAGTTGGGGAGCAGCTGGAGAAGATGAATGGGCAGCGCATGGACGAGCTCTTTGTCCTAATCC
13869	5	106.822	33	G	A	TGCAGGCTTTCCTCTGCCTGGCCCTGGAAATGRTGGCTGAGGAAGGCCCACTTACTGTTCTGCTGACTAATGCTTGTCTGGTGACTGTGAGAGAGC
15864	5	106.822	22	C	T	TGCAGGCTCTTGGTGTACACAYAGCACAGCAGGACCAGGCAGAGCGGCCCTCTGTGGCCTCACATCCTAACTCACACCCCCTTCTCTCCGTGTCTA
2396	5	106.822	60	G	A	TGCAGGAGCTAACTGTCACAACCAAGCATTGTCCCTGCTTAACAATGAGACGCACACGGRAGGTGAAGTGCCCAGTCCCTACTTGGGACTTAATCC
7805	5	107.36	18	C	G	TGCAGGTAAAAGAGCTGSATACGTAAGCCTGGCAATGTGAGTTCAACCCCCAGGGTCCCGTGAAGAAGAAAGCGTGCCAGTGCTGTAAGTTGCCCT
10247	5	107.36	28	G	C	TGCAGGGGTTTGGAGCAAAGTCCTGGTSTCAGGGAGCTGGATCTGCATAGCCAGGGGGAGAACCCACCCCAGGGTTCCCAAAGGCCTGAGCAGGGC
9917	5	107.36	70	T	G	TGCAGGCCCTTCTTCTTCCTCCTCTTCCTGCGTGCTCCTGCGGGTGCTCCCCCGAGGCACTGTGGGGGGKGTGTGTCTATGACCAGGCTCTGGGGA
6405	5	107.36	74	T	A	TGCAGGCAGCAGCTCAGACTGGATCTGCTTGCCAAGTGTGGTCAGGCCCTGAGTGACAGACGCGGGGACCAGGWGCTAATTCACAATGCGACAGTA
4938	5	107.897	15	T	C	TGCAGGTGGGCATAYGTCTATGCCTGGAGACAGTCCCCCAGCGAAACCTCGATTAGGGCTGGGCAGAAGTGACCCCGACACCTGATCTAATAGAAA
12751	5	107.897	44	T	C	TGCAGGACACCCCAGAACTTCACAGCTACCTGTAACCACACAAYACTCCCGTGTCTGGTACCCACAGCTAGCTCAGCCTTTCCCGCTTGTACGGTT
2123	5	108.435	55	C	T	TGCAGGGGAATACAAACACAGGAGATGCTCAACAAGACTCCAATGTTGAGAATTYACCCACATTCATTTCCTCCCAGTCCTTAGCCAGGTCAGCTG
4037	5	108.435	50	C	T	TGCAGGGGCAGGGTGGAGCGAAGCTTGCTAAGACAGAGCTGTCCTCTCGYGGATAGGAAGGAGCTGGCCTCTTCCTGAGAGCAGGGAGACAGATCT
3932	5	108.435	28	C	T	TGCAGGGGCCATGATCCACACCGCCACYGCTCTTGCTCTCTTCACAGCTCCAAAGCCGCCCGCGTGCGTGTGGCCAAGACTGAGCAGGTCCGACGC
4388	5	108.435	38	C	A	TGCAGGCTGAGGTGTGAACCTACTCTGGATGACGCCCMAAGCGCAAGATCAAGTACTCTGTCCGTCTTCCAGGAACCCGACGCCACTATGGCCTAT
13897	5	108.435	22	A	C	TGCAGGGCCAGAGTTGCTTCCMGATCAGAGCCTTGGCTGTCAGGGCGAGCTCACTGAGCCTTGAACTGTGTGGCTCATGAGAATTGTAGCACCCAC
4405	5	108.435	80	C	T	TGCAGGGACCTCTGAGTGGCACACAGCTCGGGCCTCAGGGTCACCACCCCCCATGGTGGTGGAGGAGCTGGAGAGTGTAYCCCAACTGAACTCATT
14311	5	108.435	23	G	A	TGCAGGCAGGAGCCCCACAGTGRCTGTAGAGTACTCTACTCTCCTCTGGCCAGAGTATGGGGCAGGGCGCTGCTCTTCGAGGGAGAGTGCCCACAC
14710	5	108.435	44	T	C	TGCAGGCTGTCTGTCCCTCCAGTTCTGAGATCAGGCTGGGGGCYGAGACTGGGGGCCCTTCATGTGCAACAGCCATTCCCCCGCCACAGCAACATC
14213	5	108.435	11	G	A	TGCAGGCTGCRGCTCTGGGATGAGGCAGTCAAACCCACACATGGCTCAGTTGATAACAACGAGGCCTTGGCGTCACTGCTCCAGGACAAGCTTTTT
9270	5	108.435	34	C	T	TGCAGGGCACATGGGCGTGGGGACTGGCACATGYAAGCACCTCTGAGTGCCTGAATGTACGCCTAGTCTTCTCTAGACCTCAGAGTGGAATACGGG
14337	5	108.435	44	T	C	TGCAGGCCCACCCCTGGCAAAAAGGCTGGTTGGGACTAAGGTTYCTTCTACAGGACTATAGACAGAAACACAAACCTTGCTGGAGAAAGGCTGGCA
12157	5	109.486	33	A	G	TGCAGGACAGAGAGAGGCCCTGCCCCCACCCCRCAGCCTCAGAAGACCTGTTTCCAGGTGCCTCCGCCCCCAGACAGAGCCTCAGCTGGAGGAAGT
804	5	109.486	49	T	G	TGCAGGCGGCAGGGTCCTAGGCTCAGTTTAAGAATCCAAGTAGGGGTCKCTTCACAAGTGGCCAGAGCCCTGCAGTGACCTGAGGGTAGTGCGGTA
1190	5	112.929	65	G	C	TGCAGGTAGCAAGCTAGCCCCTTGCCAGGCCACCAACAAAGACCCCGCAAATAAAGAGGCGTTASTGCATAGGCATTGCTGTCTGTACAATACACT
2727	6	0	20	A	C	TGCAGGGGCCAGAAAAGGGMCTTGGATTTCTCTGAGTAGAAGTTACAAGCGGTTGACGGCTGCCCAAAATGGGTGCTGGAAACTGAGCTCAGGCGC
10015	6	1e-07	63	C	T	TGCAGGCTTTTCTGCAGATCGCTAGATGGCTTGCAGTCTGTGTGCTTATGCCCCAGCTCTGAYGCAGGTGAAGTCAAGTTCAACGTCCCCTCCAAG
1689	6	0.54402	20	T	G	TGCAGGTCTTTGTAATGCTKCTGTAACCATCGACTGTCTCGTGGGGCTGACTGCTCCCTCACCTGTCTGTCTACAGCCGCCTTAACGTTTTTGAAT
1017	6	1.07324	45	T	C	TGCAGGCTTAGTCAAGCAGGGAGGAAGCTGACCTAGAAGTCCCAYACTTTAACACCGCCCGCTTTTAAAGAGACGTCTGACAAGTGCTGACTGGAT
12545	6	3.2741	36	C	G	TGCAGGAACTCAGAGTGGACCAGCAGATATAGGTGSATCTCTGGGAGGTGCCCAGGACTCCAGTAGAAGACCGCTGGTGGGGGTCAGAGACCAGGC
2932	6	4.36254	65	C	T	TGCAGGAAAAACTACAGGTGTCTGTATGAGATATTCACTCTGTCTGCACCTGTTGCACTGACCAYGCCCATTGGGGGTGGGGACAGGTGCTGATGT
9833	6	5.45652	47	C	A	TGCAGGGGGTTCTAGTATGTCTTACACATCAGCATGTTTCCTGTGAMATGCATAAAGTAATGCTTCTGGTTCTGGAAGGGGAGCCAAGGAAACGAT
9565	6	5.45652	47	G	A	TGCAGGAACACAGTGACATGTAACGCCCTGGTTTTGGCTTTGTATTRTATGTCCTCAGTGTGTTGTCTTTGACAATTAGACCTGTGTCCCAGGCAA
12325	6	5.99732	38	C	T	TGCAGGTCTGGGCAGAGGACGACTTGTCCTGGCGCAGYCCACTGCTGTCCTGAGGAACCTGGGGCAGGAGGAGCCATTTGACCTCTCCCAAAAGCG
12537	6	6.50898	21	A	G	TGCAGGAGGATAAGCCTGCTRTGTGGCAGTATGTCCTGCAAGTAGCAGGGACAGAAAGCTGACAGTTCAAGTCTTGAACAGCAGGTATTAAGTGGA
15143	6	12.7887	15	C	G	TGCAGGAGCCCGCASACGTTGAAAATGCTTTTCCTCATGATACTCTGCACACACATGGTGAAGATGGACACCAAGGCCACCACGCAGAGAATGAAG
1030	6	21.5839	16	C	T	TGCAGGCTGCCTGGTYCCACCGCCCTGTGGAAGCCCCAAATAACACACAGAGACTTTGTATTTGATATAAGGCTGTTGGACAGGTACTAGTTCTTA
7180	6	24.8723	90	T	C	TGCAGGAGCTGAGCCGCACACGGGCACAGCATAGAGCTGAGGTAGAGCAGATGCACTGGAGCTTCCAGGAGTTTAAGAAGACTGCTGCCYTATTCC
14863	6	24.8723	68	A	T	TGCAGGCCTGCCTCCCCCGATGTCCTGTCAGGAAGGGTCTGAAATGGGTAGGCCCTGTGTGCTGTGAWGGGTGATGGTACTGGGTGGGACTGAGCA
11906	6	25.4101	55	A	G	TGCAGGCCCCAGGCAGTGATAGAAGGTTCTAGTGAGATCTAGGCATACTTGATGRACTACAAGTGGCTAATGTTTCAGGGTGTGACATGGGACTCT
12382	6	25.951	17	A	C	TGCAGGGGCTCCACAGMAGCTCTCCTCACACTCACAGTGGCACTATAGTCACCGAGAGACCAGGAGGATGAAAGTGGTACATCCATCACTTCCTGC
13821	6	26.5328	85	G	A	TGCAGGGTCCTGTGGCCTCTAAGTCCTCTCATCCCACCTCCAAACAGACACCTTGCAATGCTTAACCATCTCCCCTGAAGCCAARCCTTGTAAGGA
12473	6	26.5328	38	G	C	TGCAGGGCGCGCCGAACAGCAAGCCCAAGATCTGGTCSCTGGCTGAGACAGCCACTAGCCCCGACGGCGTGCCCAAGGCATCTCCACCGCCACCCT
10820	6	27.1349	29	G	A	TGCAGGTTATAAACTCCAGCATAAAAGTRTGTTCAGTTCAAAGGAACCTAATTAACCACCGAGGGCTTGGGAGGGGGTGGGAAGTGTTAATTATGA
13240	6	27.6812	21	A	T	TGCAGGAATGGAGGCTGGACWCCCTGGACCGCTTGGTCACCCTGCAGTACCACCTGTGGCATTGGCTTCCAGGTGCGGCAACGCTCCTGCAGCAAC
6248	6	29.2938	40	G	A	TGCAGGAATCAGGACAGCCCCCTCTGGGCTCCTCCAGGCRAGGGCAGGGCCAGCTAGCTTGGCTTTGTTTCCTCTGGAGGCAGATTTGGAAATCCC
8890	6	35.6092	40	T	C	TGCAGGTTGGTCCTACCACCACGCCAGCCCCCATTAACTYGCTGAGACTCTGTATTTGATGTAAGGCTGTTGGCCAGTTAATAGTTTCTTACCTGC
4417	6	36.6649	49	G	A	TGCAGGCAGCACTCCAGGCCAGCGGAAGATACCAGGAACTCGGATGCCRCCCTCCCAGCCACCCATGCCTTTGCCACCTGTGAAGGAGGGACTGGG
5873	6	36.6649	86	C	T	TGCAGGCCCCAAATAACACACAGAGACTCTGTATTTGATACAATCCTGTTGGCCAGTTACCATTATTGTTTATGGGCTAGCTCTGYCTTAATTATT
8941	6	40.5574	33	T	C	TGCAGGACGGTTGTCACCTGGGGCCAGCCTTGYGCCCTGGGTGGGAGGGGTGAGAGATAGCCTCTCTTTTGCCCGAGCTGTCTTCTTCCTCTCTGC
7860	6	40.5574	50	G	A	TGCAGGAGAGATGAGAGACCCACAAGGAAATGGTTGGTCAGTGATGGCTRGAGTCACACCTTAAAGGAGACTGCTTCCCTTCTTAAAGCTTTCAGC
11587	6	41.6415	31	C	T	TGCAGGGCTCATCACAGCAGAGAAAGGCCAYTCCCTTCGGAAAGCTCTCACTTCTCTCAGGGGCTTAGAATCCTCATGGAAATCCTCTTTTAACCA
8183	6	42.1764	60	G	C	TGCAGGCTCGATCCTTGACCCCCATCACAGGACCTCTGCTAAAGAGGCCCTACTCAGCTSGAGAGTGCCAGCTAGACAGGCCTATCTGTGCGGAAA
10618	6	42.7141	71	A	G	TGCAGGTGACATGCACAAGGCCACTCAAGGTCACCTCCCTGACTCTGAGATTCATTTTCCACATTAGACARCTCCTAAGTGAGTGTTCAAGCATCA
11561	6	43.2517	52	G	A	TGCAGGGGTCACAGGAGGCGGGAGCTGGAGGCTGAACTGCCTGGCCCTGCCRCACAAGCACTTCCACTTTCTTTGGCTCTAGATTTGGCACTAACT
749	6	43.2517	60	C	T	TGCAGGCCTTTCAACACAGCATAAAAAGACCAGGGAGAACCTGGCTGTGACTTCCCTTGYAGGAGGGCACCACTGCAGAACTCGAGGAAGGAAGTT
16522	6	43.2517	58	G	A	TGCAGGAATAGTGACACACTAAGCTATTACCTGTACATCATAGCCATCCCAGCCTTTRTTCTGGCACTGTATCACTTTGGGGGTGTAGGCATCACA
14260	6	43.7838	71	T	C	TGCAGGAAATGCAAAAGGGCTAGCTTCCCAAAGCCACTATGGGAGAGCTGCTTGCTCCTTCATTTCACTTYAACAGCAAAACCCCTCCAATTCTGG
14610	6	45.4203	77	G	A	TGCAGGGGACGTTCCTTCTGAACAACACACAGCTGGCCCAGTTCTCAGAAATGAAGGCTCCCATGTGCCAGTACTCRGTGCAGAACTCCTTCTACA
5775	6	45.4203	21	G	T	TGCAGGAATATGACAGGGGAKGAGAGGCCTGGAAGGCCTCAAGGCAGGGGCTGCTTATGTGTCTGAAGACTGGGGATTTGGGAGCTACCAATTCCC
5170	6	45.958	90	A	G	TGCAGGAAGACCCTGAGTACTAGGCTTGAGAATGCCACACCAGGAGGAGAAGATCCTCACTTGACTCCTGGCAACTATAATACACTCTCRGTTTTT
13794	6	45.958	17	G	A	TGCAGGATGGCAATTTRAGAAGTGAAAAACTTCCCTGAAATGCTTGGGACATCATGCCCTGGATTTTTAATTTTTACCTTATTGTTCCACTAAATC
9527	6	45.958	12	T	G	TGCAGGTGTGGKCTGGAAAGGGCTTACCTTTGTCATGCTTGGCTCTTATCCTCCTGTCCCATTCTGTCTGCTGCATGTGAGCTGTGGGCCTATGTG
13736	6	45.958	88	C	A	TGCAGGATCGATCGGGCCACTAACCCGAGGAGTCCTCCAGGACCAGTCAGCTCACAGCCCCGAGAAGCGACGGGTCCCTTCCCACTGMGCACTCCG
1937	6	45.958	50	C	T	TGCAGGTGTTGCTTAGAGGGCATGGTCTCCAGCGTGTCTCCAAATAAAAYTATAGAAAACACCTGCAGAGGTCAATCATGGTGCTGGCAACAGCTG
8239	6	45.958	67	G	A	TGCAGGTACACTCTTCTTTGTTATCCTCAGGGAGTATTTTTATACAATCTTTTAAAAAGACACACCRTGAGACTGAGAAATCAACATGACATGAGG
13890	6	45.958	71	C	T	TGCAGGCTTACTTAGCAATTCCCCAGCTCACCCTGACTTCTTATTCCCTTTGCTCTGACCACACTGGCCTYCCCCCAATACACTTGAAATTCACCA
11079	6	45.958	77	T	C	TGCAGGTCCATGGCCTGCGGTGTGACCCACAGCAACCCTGGTGTCGACACACGGTGGCCAGTGGAGACGGCAACTTYGCTCAATGGGCTGGCTGAG
5622	6	47.0393	26	C	T	TGCAGGCTGACCTTGAGTGGGGCAGYAGGCATTGTTTCTCCCATCCATCAGAAGTATGACTCTCCCCTCTAAAGGATGGGTCCTCCTTAATCTCCT
8383	6	47.0393	83	C	T	TGCAGGTTGAGATTTAATGAAAGCAGTAGTGTGCAGTAATTGCTTGTCTTCAACTTACTTTAAATTATCTCTGTGGGCTTAGYCCCAGATATGAAG
13207	6	48.1233	72	A	C	TGCAGGGACGGTACTAGCCTGCTACAGGTGTCTGTAACCACTTGTAGGATAAAAGAATAGTCATTAGAGTGMTATCCTTCCATGGCCTGATACCTC
4818	6	48.6583	72	G	A	TGCAGGTGGTAAGGGGTTGGGTCCCTGACATCCAGCACGTAGTCCCCTGTGCTACCTCTGTGTATACATGGRTGTGTGGTTCTGCTGCGTAGCCAG
10537	6	48.6583	38	G	A	TGCAGGTGTTAGGCAAAGTGCTCCTAGTATGCGTGCARAGCCAGGGTTACAGTGAAGTTGTTTGATGCAACATGATCAAACGCTGCTAGAAACATT
2217	6	49.196	26	C	G	TGCAGGTTAGTGCCACATAAGAAATSATCACACTGAATTGACAGGTTTGGTCCAAATTCCAGGCTTGGTTGCAGTTAAAATGTCTATTATAATAAC
7755	6	49.196	56	C	T	TGCAGGTCCTTCTAGGAGCGTGGGTGACGTGTCGGTCGGGTCACCCAACGGAATGYCCAGGGGGCGCGCGGGCGCGCGGGGGGTCTGGGAATTCGG
10788	6	49.3888	59	C	T	TGCAGGTTTAAACTAATTACACTCCTTGGTGATGCTGACTGAGCCAGTTCCTTAAGGAYACTCTAAACCCCTAGTTTGGGAAGAGAGAACGTCCAT
11836	6	49.3888	72	T	A	TGCAGGGATAACCTGGAGATAGAAAGCATGTCTCTGACTCTGTAAGACATTTCATGTGTTCTGCTGTTCCTWTGATGGGAACAGATGTCGGGAAGC
5147	6	50.1224	52	T	A	TGCAGGTCAGGTCTCACTCTTTGTTCCTTCCACTGGCCACGCAAGCCCCAAWAACATGCTGAGACTCTGTATTTGATACCCTGTTGTCCAGTTACT
7749	6	50.6567	61	A	G	TGCAGGACCCAGGTTCCCAGGAGGGCCTACCCTTCTCCGCAAGCACCACCTTGCAAGTTTRGTGTGGAAAGGGCCAGGCTGTTGTTTTAAGTTCCT
4219	6	50.6567	26	G	A	TGCAGGCAGCAAGTGTCCCTTCCAARTGACTCAGTTGGCCCATACCTCTTCCAGGCAGCTCAGCAGGGTTCTGCTCTGTCCAGGCCACTGGCTTGC
15401	6	50.6567	38	T	C	TGCAGGTAGTTTAAATAAACTCAAGATTCAAAGAGGTYGAGTAGCAACTAGCTAACTTCTCCTAGCTGTCATCTCCTAGACAGCATCCTTCTGCTC
12962	6	51.1836	22	G	A	TGCAGGGTGGGCATGACACACRTGACTCCCCTGATAGGGACCCTGGTGGCCCTGGAAACAGGTTTGTACCCAGCAGGTGTCCCACAGCTGCCAACT
8339	6	53.3785	35	G	A	TGCAGGGCGCCTAGGAGCTCGGGGAATGGAAATCRTCAGGAGCAGTGGGTGCAGGCGGGAACTTTTGAGGACAGAATGGACCAGTCTGCTGCTTGG
2267	6	53.3785	88	T	C	TGCAGGCTTATATAACAAGACCTCCAAGAAAGAAAAAGAAAATGCTCCAAATAAGGTAAATTTCATATGTGAGGGTCCAGGAGAAGAYTTGGTTTT
4056	6	53.3785	27	A	C	TGCAGGGGCAACTGACCAATCAACACMAGACAGGCCGCCCAAGCTCGGAGGTGCACCAATCCTGGGAGTGATAGGGACCTGCAGACGCTCCCCCTG
13834	6	53.3785	29	A	G	TGCAGGAATCATCTCTCCCTCCCTCTGCRTGGGACCTCGGGCTTGGTGGCATGCCTTTATGCACTGACCCATCTTTCCAAACCCTTACTTATTTCC
3452	6	53.3785	20	T	C	TGCAGGTGGGTGAATGCCCYGCTGAAGCCCCGCTTTTGAGAGGAGCTCCCTGCTCAGCCTCAGGATCCCATCCCGCGTGGCTGAGATGCTGTGTTC
9437	6	53.3785	72	A	G	TGCAGGGTACAGAAGATTAATGTCTGAGACCACTTGTCCTGTCCAGTTTACATGCTCCCTTGACTTCTAAGRGAGCACAGGGAAACACAAACAGCC
8767	6	53.3785	60	C	T	TGCAGGCTGTAAGCCTCCTGTCTCCCCAGCTTGCACATGGTGAGAAGGCCCCTAAGGAGYCTCCCTAACTCCATTGACAGTGCTCAGAACTTGCCA
12025	6	53.3785	69	C	T	TGCAGGCTGGCCCTGTTAACCGCGGGTGACCCTCTGGCTGCTCTGGCCAGTGCACAGGGCTCTCAGCAYGGGACAGCAGCTCCATCCGCCGCACAG
5492	6	53.3785	50	T	C	TGCAGGTATGGCATTCACCCCACACACACCCCGTCTTCCATTGCTGCCAYGGTGAAGCCTCTGGTAGCCTAGATCACTGGTCTGTGCTAAATTGGA
12552	6	53.3785	74	A	G	TGCAGGTATGTCTGTGTACCCACATATGTGCAGTGCCTGCCGCAGGCAGGAGAGAGCAATATGGATTCACGTGRAACTGGAGTTAGTTACCACATG
5431	6	53.3785	11	T	C	TGCAGGCCCTYAGCTATGATGACAGCTGTGGAATATCTAGCCATCCCTTCAGTGTAGCAGGACGGGAAAGTCCTAACTACCTCTCTATGGCTCTGG
5291	6	54.9328	39	G	C	TGCAGGGCCCGCTGCTTCTCTCGGGCTGCCTCGGCTTCSGCCTTTACACGCAGGGCCAGCTCTGCCTCCGCCTGCCTTTTGCGCTGGCTCTCATCT
12534	6	54.9328	40	T	C	TGCAGGTAACAGGCACGGATAACGAGCGAGGCCATCTCCYGCGGAGGTCCAACCCGACCAAGAACAGACTGGAGCCAGAGAGCCGCGAGGCATTGT
11595	6	55.9372	26	G	A	TGCAGGGAGGGGAGGGTCTCGGCACRGGTGGTGACCCTGACACTTCAGAGTCTCACCCCATCCCCTTTACCCACAGTCGTCAGACGGCGCTGAACC
8207	6	55.9372	55	C	T	TGCAGGTCAGCCAGTCCAGTCAAAATATCAAGTTCCAGGTTCAGTGAGAGACTCYGTCAAAAAGTAAGGCAGAGGGTGGCTGAAGAAGAGAGCTGG
5367	6	55.9372	46	C	T	TGCAGGAAAACAGACGTGCTGGTGCTGGGGTTGCCGTCCCACTTCYCAGCGCGCCCTCCCTCCCCGTTTTGGCGGTTACTGGACCTACACCTTGAA
2204	6	56.4736	46	T	C	TGCAGGCTGTTTCCAGGGGAACTCGGTGGTGGTGCAGTGGGTCAAYGATTCCCCCTGTGGCCACCTGTACCTCCAGCAACCTCAGTCCTTCCTCCT
10007	6	56.4736	59	T	G	TGCAGGCCCCGTCTCTAGGAAAGCACAGCCTAAACTAAGCAGTTCAGCCCCTGAAGAGKCCACATTTTCGGAAAAGCCCCTTAAACTGAGAGCCAA
4811	6	56.4736	33	A	G	TGCAGGCTCTGTGGACGCCCTCAGGACCACAGRCAGCGGCAGGCTTCCCTGCCAGGGCAGCTGTCTTTCTTCCCACCCTGGGCTCTCAGGTCAAGC
8944	6	56.4736	81	A	C	TGCAGGAAGTGAAGTGGGGAGACCAGAGGTGTGTCTGCGTGCTGTAAGACGGTCACCTGAATAAGCGGGGTGCGGGGGCTMGCGTCTGCGGCCTCA
7923	6	56.4736	46	T	G	TGCAGGTAGCAAGCGGGTCGGAGTCTGCGCCCATCTGACTTTCTCKTCTGGCTGTTGGGGACATCGCCTCTGCATCAGCTCCAGGACCTGAGACAC
8499	6	56.4736	71	C	A	TGCAGGACCAGAACATCCTCACCTGCCCCTACGTCGCCCTGCAATTGCGGGTCTCACCCGTGCCCATCCCMGCGCAGAAGCACCTCCCGAGAATCC
13555	6	57.0089	16	T	C	TGCAGGAGCTTGAAGYCCACCGCGAGGTGATGGTTCTCCAACACTGACACGTCATTGTGAGTCAGTGCCAGCTCTGAGTCTGTGGGAACAGCCGAG
13109	6	57.0089	47	A	G	TGCAGGTGGCTTCAGCTCACATTTCCCCTCTGCTCTTTAAGGGCTGRCCATGTATAGTAGGCTGCTAGACGCAGACCATACCCAACTTCCTCCCCA
12106	6	57.0089	32	G	A	TGCAGGAGAAGGCTCCTCCAGCCCCATCCCCRAATGCTCCCACGTTAATTCCTCAAAATGAAGCCTTCGGAGAAAGTGAAGTTGGCGGCTGGGAAA
14439	6	57.5441	28	C	T	TGCAGGAGCCAAGGCCAGCGTGGGTGGYTGAAATCTCCTCGGTAACGGGATCTGCCTCTCCCTCTCCTGGCCTCCTCCCCTAACCTGCTGCCCCTC
9873	6	57.5441	54	T	G	TGCAGGCAGAAGCAGGCATGCACTCTGTCTTCCTTCCCATCACAAGCAGGGCCKTCTAATGTTGTACCTGCATTCAAAGCTGCTTCTGGCATGAGA
486	6	57.5441	14	G	A	TGCAGGACCAAAGRCCTGGGCAGCCTGACATCATCTCAAACAACCCATGCCCTTGACACTTGAGTACACAGCTGACCAGGGCCTCTGAAGAGACAT
10036	6	57.5441	44	A	G	TGCAGGCGGCCGCGGCGCAGCACGTGTTGGCGCTGACGGGTTCRGGCTCGGGCCGCACGCTGTTGGCAGGACAGGCAGCGCTGCTGCGGGCTCTTG
9303	6	58.0818	59	C	T	TGCAGGTGAGGCTGCCACCTGGGTGGGTGCGGGGGGATGGAGGGGCGCTGGGTGGTCTYTTGTCCTTCATGTCCTCGTTCTTAACAGAAAGCTTCT
14556	6	58.0818	62	G	A	TGCAGGAGGCGCACAAGTGGCGTATGCAGCGCCCCCTGGTGGACCGTGATCTCCGCAAGACRCTGATGGTGCAGGACAACCTGGCTTTTGGAGGCC
2233	6	58.6535	71	C	G	TGCAGGGAAGACAATTCCTAGAATGTGCTTCTGCGTCTTGGATGTTCATGTGGTCCTGGGTCCAAGGAAASTTGTGGTTTCTTTGCTTCTCTGATA
2627	6	59.1635	12	G	A	TGCAGGCCAGARGAGGGCACCAGATTTCATTACAGATGGTTGTGAGCCTCCATGTGGGTGCTGAAAATTGAACCCAGGTCCTCTGAAAGAGCAGCC
4880	6	59.1635	52	A	G	TGCAGGACAAGCCAGGGCTTTGAGTCCCTGGGGCGCCACAGCAGCAGGTGGRAGAGCGCAAGAACCGCCTAGGAGCAGTGGCCCAGCAGGTGCTGG
13526	6	59.1635	11	G	A	TGCAGGGCAGRCTGGCTGGCACTGGCCTGCTTCTGTGAGGTAGAAGTCCTGGTTCCTCCAGAGAAAGGGGCAGATGGACAGGCTGCTACCTCCCTA
13113	6	59.1635	86	T	C	TGCAGGTTGCTAGAAAAGGGTGCCATGTGGGTATGGTTGCTAGTCAAGATGTTAGTGCATGGCTGGGGAAGAAATAGGAGGAGCAYTGGGCTGAGC
9335	6	59.1635	23	A	G	TGCAGGGGTGTGGCAGTGTTTCRATTAGGGATGCTGCTACTTACAAACCATTGGACAGACTCATTTGTAAACAGACATTTCTAAATTCATGAAAAC
8082	6	59.7011	74	G	A	TGCAGGTGAGGACGCGCGGCTCGTTTCCCTTCCTTTCACCCAGGGCTTGGGGGCACTTGGCTAGCGCTCCCTGRACCACGAGGCTTGGCGCCAGTG
1252	6	59.7011	65	A	C	TGCAGGGGAAAGGATATAATGAACAGCCCCAGTGTGGAGAGTCTCCATTCTGATTTGAACATTAMATATGAAATGTAACCAAACGACACCTGCTAG
7460	6	60.2388	64	G	A	TGCAGGACATGGGCAGTGAGGCGGGGCAGAATTCCAGCGGGGACAGAGTCGTGCCCCATCTTCRTGAGCCAGCTGGGAGACCCCTAGGTGCGCCAA
8439	6	60.2388	74	G	A	TGCAGGGGTCCTCAGGGACCCTCTCACCTCCTCTTTCTCCTCTCTGCAGGCTGGAGAATGGCTGTGGGAATGCRTCTCCTCAGACCAAGGTACCTG
13128	6	60.2388	70	C	T	TGCAGGGGGCGCACACCCTCCCACCTTGAAATTAAGACTCTCATTTATGATGGTTTTCCGAAGCTTTGCYAGCGCATCAGACTCCTCGGTGGCATT
4394	6	60.2388	12	C	T	TGCAGGTGTGGYACTGAGGTCCCCAGAAGTGAGTCAACCCATTGAAAACTATGTAGAGTAAACAAAGGCTGAATAAACATGCAGGTCCATTTGTCC
4828	6	61.8693	55	T	C	TGCAGGCACGACTACACTGTGCTATTCTGTGTCTAAGCAAAGACTTCAGTTTAGYTGGAAAGGGCCGAAGCTCACCTTCTCCGCACCCAGATTGGC
16395	6	61.8693	75	G	A	TGCAGGTTGCTAAAGAGCTCCTTCTTTCTGCTTGCCATCTGCTCATTGTACATCACCGTGAACCGCGACAGAAARTAGGGAAACCACTTTCGGCAT
2122	6	61.8693	76	C	T	TGCAGGTAAGAGATTTCAAAGTATATTGACAACGACTTACTCCTGTTGAAAAAATGAACAGAACAATAGCCAGCTYCTTTCTTCCTCTTACTAGGC
71	6	61.8693	12	G	A	TGCAGGCAAAGRCTGCAGGGTCAGCATGAGGGAGCCAGGGGGGACCTGGAGCTAGGGTCTAAGAGAATAAGGCCCCACTTTCTACAACATAACATG
1387	6	62.407	68	T	C	TGCAGGTGGAAGGGGCAGTGCTACTGGGGCCTTTCTTACATGGGGACCAACATCCACTCCCTGCAGTYCTCCGTCTCTAAAGGGAGCAGTGAAACC
5148	6	62.407	68	C	T	TGCAGGACAGAGCCAACCGTGAAGGTCACTACCGATCCCAACGTGACCACCCACTCCATCCCACCTCYAACAGGTGGTAAAATACCTTGAAGAAAC
14504	6	62.407	85	C	G	TGCAGGACAGAGGGCAGCTCCAGGGTCTGGGCTGGGAGCCCTGCGTTCCCTGACTGGGATGTGGAGGGCTGCACTCTGATCTTTSCAGTCCCCTTC
12836	6	63.7783	21	G	A	TGCAGGTCAGGACGGACATCRGGTCCCCTGCAACTGGATTTACAGATGAGTTACCATCTGGGTTCTAGGAACTGATCCTGGATCTTCAACAAGAGC
14229	6	67.4157	33	T	C	TGCAGGACTCCTCTGTTGAACCACTGCCTTCAYAAGCTCCTGAAACAAAACAAACTAACAGCAGGGCTTCAAGCAGGAAGATTTCTGATAGTGTCA
7484	6	67.4157	20	G	T	TGCAGGGAGCGGGAAGCTCKGCGATCTTCTCAGGCATGCAAAAGTCAAGTTGTCTCCGCGTCTCGGAAACGACCCTCGGTCAGGGCTGCAGACCGC
10300	6	70.274	56	A	G	TGCAGGCATGGACTGCAGAGGCAGGGGAGGGGAGGTGGCTGCATCTGGGTGGGAGRGATAGACCCCATTGTCCTCCAGGCCTGGGGAAGATGCAGG
821	6	74.8948	68	C	T	TGCAGGAATACAGCACAAAATATTTTTATAAACAGAACGGACGGATCCGCCCTATTGTGGCAGAGAAYCCCGAGTACCTCTCCGAGTTCTCGCTGA
15312	6	76.516	61	A	G	TGCAGGAAGATGGTTTTCTGTGCTAGTCCACAGGAGAAGATGGATGGAGCTGTCTAGCACRGTACCTGCAACATTTTCATCAGCTGGTACACCAAT
4753	6	77.048	66	C	T	TGCAGGCATTTTATGTCTGGTTCTGCCTAGGTTGGAAGTGTGCATCCTGTTGAAAACTTCCGTGTYCTAGTGAGGCAGAAGATTGCCACCTTTGAG
12437	6	77.5829	35	C	T	TGCAGGCAGAGGGGGTGCTTCAGGCTCCCCTGACYGTGAGCCAGTGCCCCAGCAGTGGCTTCTATCTCTATCTCACATGGTGCTGTTCTGTGCCTC
3965	6	78.6698	21	C	T	TGCAGGCTGCTTAAGCCCATYGCCATTCTTCTGTCCTCTGGAAGAGAATGTAACGTCAACCCAACCCCTATGGAACTGGGGTCCTGTATGCACCCC
9364	6	79.1934	38	G	T	TGCAGGTGCAGGTCTGGATTTTCTCCCAGGTTCCATGKCTGGTGCAGTGGCTTTGGTTCAAGGCTTGTCTGAAGATCGTCTGCACCTGCCTCTGCA
5257	6	81.9416	18	A	T	TGCAGGGGCATGGGGTGWAGGGGTAAGATCTGGGAGGCGCTGGGCCCTCACTTGGCCTTGAGCCTCTGCAGGTCGTCGATCAGGTTGTCACGTTCC
7045	6	87.0216	93	A	G	TGCAGGCGAATGCAGATAAACTTTGGCCTTTCACTACAAACTTGGACAGAGCGGCAGCTTGCATCGGTCACCCCCTTAGTTCAGGCTGCCTGRTCG
4516	6	91.2446	20	C	T	TGCAGGACCAGCTGGACCAYCAGGCTATGGACCTCAAGGAGAAACAGGCCCAAAAGGAACACAAGGAGTTGCTGGCGCCCCAGGACCACCTGGAGA
8727	6	93.1775	28	T	C	TGCAGGTGCCTGTAAAACAGCTTGGAAYAGTTTTATACCTTGCTGTCACAGCAAAGTCTATGTCTTTGGGTTAAAACATTTTTCCTAGGGTCCGAT
13299	6	93.1775	14	C	T	TGCAGGAAGAGCTYCCCTTCCTTTGTGCTCTTTTGTTCTTCGAGACAGGGTTTCTCTGTAAATCATCTTGGTTGTCCTGAAACTAGCTCTGTAAAC
12700	6	93.1775	14	G	A	TGCAGGCCAACAARCTCCTGGAAAATATCCCAGGACCTATGCAACCCCTCAAAATGAGTCGTGGCTCCAGAACCCTTTCCTGGGGCTGGGGGGGCA
14424	6	93.7124	34	T	C	TGCAGGAAGGCTGGTCATAGCAGACCCTAGAGGYCACTGGCCACCTCTGATACCATGCTGCAGCTGCTGGGAAGAGGGGACCCTTGCTCAGCCTCA
2322	6	94.7964	32	G	A	TGCAGGGATACTGCCCTGCTTGGCACTGGGGRTCAGGACAGTGTTTTGCACACACAGGCTTACAGGCAGCAGGATCCTCCACTTTTCCTCCTCCTC
13530	6	94.7964	50	A	C	TGCAGGCAGAGACTCATTTCCCAAGCTCTAATCAGCTCTCTATGCCTCTMTCTAGGCACTGCTATAGACAGTGACTCTATCACTCGCTGGGGTGAT
15778	6	95.334	63	C	T	TGCAGGATGCTCCTTAAGCCAGAAGGTAAACAACTCAAAACAGTTTCAGGAAGCCCCTGAAAYGGACCAAATTCTCTAGGTCCACGCCCCTCCCTG
15369	6	95.334	81	G	A	TGCAGGCCAGAAGAGGGAACCCAGATCTCATTACAGATGGTTTGTGAGTCATCATGTGGTTGCTGGGAATTGAACTCAGGRCCTTCAGAAGAGAAG
14983	6	96.4152	17	C	T	TGCAGGCCTTGGTAGGYATTCTTTGCCACAAAGGTCTTCACTCGGAGCTCAGGGGTCTTTCCCTGGGCCTTTCTTGCAGACCACCTTCCCAGCCCC
2625	6	96.4152	46	A	C	TGCAGGAGCCTGCCCAAGCCTGCCAAGCTCATTAAGTAGGAAACCMCTCTGTGAAGCATCACCAGGCCATTGCCAGGCTCCATCTCACATCCACTG
425	6	96.4152	30	G	T	TGCAGGATGGTCTCCATGGAGACAGGCGGKATTTGGTTTATATGAAACGGTCTTGCAGTTGCTCTTGGAGTTGAACCAGTTGTACAGGGAAGAACC
10860	6	96.4152	27	G	A	TGCAGGAAGGGAGACTGGGAGCAGTARAAGCCATAGAGGTTCACGTCCAGGATAAATGCAGCTATAGAAACCAGGAAACTCACCAAATCTCACGAG
2043	6	96.953	19	C	T	TGCAGGAAAGATTCTGGGYTCAAAGGTCAGACAGGTCCTCCACTCCTGATCTCTCAGAACAGCACCAATTGTGGAGTGATCTCACCATATGGAGTC
12123	6	96.953	71	G	A	TGCAGGTGGTACCAATAAGAAAATGGCTCTGAATTCAAAGTCACTCCTTCCTGAGCTGCACTACAGAGGARAACAAGGCAACAAATTAAAGGGCAT
14375	6	98.5838	77	C	T	TGCAGGGAAATGGCCTGACCCTTTCCCACTCAGCTTCAGGATCCAGCCTAACACTTGGAACCCATGGCTGCCAAAGYAGCCCTTTTCACAAATAAG
8658	6	98.5838	69	G	T	TGCAGGGGACACATTTGACTCTTCCTCGTGCCCAACCTAGACAGCAGCCCAGAGGGAGCACTAAGCTCKCGAGGCCATGCCCCTCAGAGTCTGGAC
3453	6	99.1186	60	C	T	TGCAGGACACGACACGATAATTTAAGGTGTAGTAGTGGCACATATACCTTGGTGGTAACYAACAGGTCTCTAATCATATGTAAGACCCACTTGACA
912	6	100.219	58	C	T	TGCAGGAGCACCCCGACTCCACCTGCCCAATCCCCACATGCCTCCATTGCCTGGGGAYGCGGCATCTGCTTGTGGATCCAGGATCCCACTCCTATT
13114	6	101.872	12	A	G	TGCAGGCAAGGRACGGTGGTCGGAGAGGCGTCCTGGACTCGTGCTGGGGAAGTGAAATAATGAGGACAAGACATGGTTCTTGGGGCTGAGGAAACA
12365	6	103.503	19	C	T	TGCAGGGTGTCCAGGTGCYGTTAATGCACCCTGCTCTCAGCTGTGGGCTGCTTATACCTGGCTGTTCAAACTCGATTCCTCTATCCACTTTTCCTG
13737	6	103.503	65	T	G	TGCAGGGCTCCAAGCAAACCATGCGCCTCCTGTGTTCTCTGGGATGTGGCTCAGGCTGTAAAGCKTGTCTTAGAAGTCTTTTTAAAGCAGTTAATT
10057	6	104.585	71	C	A	TGCAGGACCTTCAGAGCCTAAAGAGCATTGTTCAAGTAGGGACAGGACCCTTAGTTCAAGTAGGCCAAGGMGGGATGACGTCTCACCTGGCTTAAT
13079	6	104.585	29	G	A	TGCAGGCTGGCTGGGGCTTGCTGAGGTGRCAAAGCAAATCAAGGAGTCTTTCTGTGCCTCGATCTCCATTGCACCCCTTGTCCCCGTGTGGTATCG
9815	6	105.126	27	A	G	TGCAGGAATGGCCCTCCATCCATCCCRAGCTGCTGCATCCCTGCCCTGGCCCAGGCTGCACAACCAGGCTTAACTTTGAGTGGGGACAGACAGAAA
2476	6	105.126	26	G	A	TGCAGGGAGAAGCACAGCTCAGTGARTTCCCAGAGTCCTAACAAATCATCAAACCGCAGCACGCGGTTCCAGGAGCACCAGGACTTAAACGTGGTG
12026	7	0	59	C	T	TGCAGGACAGACAGCAGAGCTTGAGTTGCACCCCTGTCCTGCTGCCCCCAAGGCTCTGYAGGAGTCTCTCGAAGGACACGGGGTTCATGGACACAG
4123	7	0.272725	27	T	C	TGCAGGTACGAGCGGGCCTCTGGCTCYTCGTGGGCCTGTGGGTTCCTGGGGACCGAGGGATGAGCAACCATTTTGTCTCCTTATCTCCAAGATGAC
12753	7	0.272725	84	G	T	TGCAGGACTTGCCATGTCTGCTCAGGTCGGGAGGGACCAGGGAGTGTTGTTGGTGCTGATGCTTCTGGAGGCCAGGGTTTATTKTCTCGACTGCTG
2157	7	0.482996	20	T	C	TGCAGGGGGCTTCATCCCTYCTCACACCTGTGGCTCCCCTGTCACCGCTTTCCAGGTCCTCTTGCAGGTCCCCAGCCTGAGTGTATAGACAGGGAC
11086	7	0.482996	11	T	G	TGCAGGGTATKAGTCTCTGTGCTCATCAGATCTGTGGGCTTCTACCATCCCAGAGTCTCAGCCCATCCTGCCTCTCTCCTCAAACACGCTGTGGCC
12391	7	0.482996	29	A	T	TGCAGGTCCCTTGGTACCACCTTTGGTAWAAAGCTAACTTTAGGAAAAAGTCTCTCTGTAGCCTAGAGCTGCTCATAGTATGTGGGATGGGAGGGA
1265	7	0.482996	21	C	T	TGCAGGACTGTCCTGGTTGCYTTGATTGACACAGGAAGACCCAGGCTGACTGTGGGTTGCACTTTCTGGTGGCAGTCCAGACAAAGGGGGACGTCA
13308	7	0.482996	32	T	G	TGCAGGTGTCTCCTCACTCTGCTTTAATACCKCAGGTTCCCTTTACCGTAAGCGACTCTGCACCCACCGCAGGAAGGATGAGTGAGGCGGCTCTGT
11104	7	0.482996	81	A	G	TGCAGGGGTTGGGGGCAGTACCAGGGCAGGACAGTCACCTTTGGTGGTCTCTGTGCAAAGAGAAAGGCTGAGCTCTGAGCRTGAGGGCGGAGTTGT
10800	7	1.02064	55	G	A	TGCAGGGCATAGTGTGCTGAGTATCCCATGCATGTCAATGAGGTCACCTTTCTCRTTTGCTCCTGTGGTGCCCTCACTGTTTGGAAACCAGGTCCC
15506	7	1.02064	76	A	G	TGCAGGAGCCAGGCACCTCTTACTTATCTTCTCTGCAGTGACTTATGGCAGAAAGACAGGCTTCCCCAGTTAAACRTGACCAGCAGCACACAGGCA
9336	7	1.02064	12	G	C	TGCAGGAGAGCSAAGGCTCCAGATGGCTTAATGATAGGGGCCTAGGGCCCTGCTTTACAAGTCTCTCTCTTGGGGGAGAGAATGATCTGGGCCGCA
9564	7	1.21385	22	T	A	TGCAGGTGCTCAGGGAGACGAWGCCAGAGTCTTTGCAAAGTTGGGGAAGGCACCACACAGATGCCCATGACTGAGCACGGCTCGGGGAGGCAAACA
3123	7	1.21385	65	A	G	TGCAGGGGGCGCTGGCGGAGGCCAGCTCGGGGGTTCCACAAGGAAAAGGAGAAAATTCAGAGGARCGCTTACTCGGTGATGGGGGTGACTGTCTGC
2919	7	1.93961	61	G	C	TGCAGGTGTTTTTCCAAGGTCTCTGTGGCACCTGATGCAGATTCCCAGTCATGGCAATACSGTGACACATAGGCACGGGGTGACACCTAATAAAGT
3273	7	4.13981	24	A	G	TGCAGGTGTTCCTGGTGCTTTGTRAGCCAGAAGAGGGCACCAGATCCCATAGAACTGGAATCATGGATGGTTGTGAGCCTTCTTGTGGGTGCTGGG
4088	7	5.20689	76	A	C	TGCAGGCCACTTAGAGATGTCTGCCGCAGAGGATGGCAGCTCTTGTCTGTGGTCCCGATATTTTGGAGGTTGAGGMTGGAGGGCACTTGAGCCCAG
4215	7	7.96385	85	G	A	TGCAGGCTGGAAGGATGGTGAAGCCACAATACGCCACCTCTGTCCACCAGGACAGCTTTCTAGACAGCTAATCTCTTCCGTGGTRCCATCGTCTTT
9373	7	7.96385	24	T	G	TGCAGGTGGCCACCTGCCAAGTGKGGAGCAGAGCGGCCACTCACACACCCACACTGTGTCCCCAAGTCCATTGCCACCCTGCCTGTTAGGCTAGCC
1969	7	7.96385	30	G	A	TGCAGGAAGTCCCAGGTTCAATCCCCAGCRTCTTACAAACCAGGCACTGTGGCACATGCCTGTGATTGCAGCACTTAGGTGGTGGAGGCAGAAGAA
15482	7	8.5015	20	C	A	TGCAGGGGGATTCCTCTGTMTCCCCCTTGGCCAACCTCTTCCAGGGTTGCCAAACTTCAAGCACACCTGGGTCACATTAACTATGTCTGGCTCTTT
7995	7	9.03916	52	A	G	TGCAGGAGGTCAGTCTCATGTGTGTGTCCTCCCACATGTGTGTCCCTCGCCRTGTTTCCCAGGCTTAGTGCCTTTATCCATTAAAGCCATCACGAC
3554	7	9.03916	28	A	G	TGCAGGGTCAGGGATGTGCTTGGAGGCRGTATGGGGCAATGACTCACACAAGAATGGGACGATGGCGCATCCTCCCCAACCCTACAGCATCCATTA
9236	7	9.03916	56	G	C	TGCAGGCTGAAGTTAGCACAGGACTAGCTCACAAAGCCTGAAACACTCTCATCTGSGCTTTAATGGGAACTGTTTGCTGATTCCTCACCTGAGGCA
14530	7	9.57681	54	A	G	TGCAGGACTGACGGAGAGTCTCACCTCCCTTTCAACAGTCTGTGTCTTAGTGARCTTCCCTCCAAAATGGAAGGTTTTATGTTGGAGGAAGTTGCC
1463	7	10.1146	23	G	A	TGCAGGAACAGAGTGGGCATGGRTTTGCTGGCCATAGTTGAGGGCCCCAAGCCCAGGCCTGACACACAGCCTGGGGCGGCAGACATCAGTACAGCC
6874	7	10.1146	52	C	T	TGCAGGACACATAGCCACCCCGTTCACTGCTGCCATGGGCTCAGGACAGGCYTCTCCATACCCAGGATTACAGTGCCCACCTCTGCCCCCCAGGGT
3712	7	12.3031	53	A	C	TGCAGGATCACACGCTTGTCTGAGATTTAAGTCTCTGTGTATGTCCGTGTGCMTGGGCCCACACTTGCTCATGTGTTCAGGGGCCAGAGGCCCACA
7950	7	12.3031	34	T	C	TGCAGGCTGCTGACCATGCTTCCTGAGGAAGTGYCCCTTTCCCAATACCAGCTTCAGAGGTCAGTTTCTGGCTGGCCACACTCAGCATTCCACACC
16346	7	18.7278	32	T	C	TGCAGGCATTCATGGCAGCCTGCCAGGTCCTYTGCAGCAGCCTGATGCCAGAGGGACCCTTCCTATCAGATCCACCTGGCCTGTTACTCTCAAATC
11234	7	19.3547	30	T	C	TGCAGGGTAACCTGTCCCTCCTGCAAGGGYTCCTCTCTCCCACTCTCCATCTCCAGGGCTGCTCCCTTTGCTCTCTGCTGCCTCCTGGTGGCCTCC
12617	7	22.1258	54	T	C	TGCAGGAGGCAGCAGTAAGAACCCTGTGCTCGCAGCCGAGCTTGTCAGGAAACYCTTTGATGACTTTGGGGATGCGCTTCATGATGCCCCCTGTTC
6782	7	22.6381	20	C	A	TGCAGGGGTCCAGTCTGAGMTCCTCTGAGCCAATAGTAACATTTCAAAGCCACAAGAGAGCCTGGTAGAGGACACACCGCATGACTCCCTCCCCTC
1779	7	25.9696	26	T	C	TGCAGGGAAGGCACACAGCACACACYTGCTAGTACACACACCACAGCAATTCACACGCTGATACTGGGCCACAGGGAGCCAGTGCAGAGGTGGAGG
12279	7	25.9696	77	C	T	TGCAGGCAGAACTGATAACTTGTTCAGCAGGCAATCATTAGAGTTACAGAACTTCGTCATCCCTGGGTGACTGTCTYGGGCTTGGCTCTGCCTCCT
15585	7	27.0537	45	G	C	TGCAGGCAGCCCCATAGGTTGGAGTGTGTCCTTTCCCAGTGGCTSCGTTGGTCTGAGCCTCTTCCAGGCACATCAGCTTGTCTGAGAGTCTATGTC
1593	7	27.5886	50	C	A	TGCAGGTTGGGTGCAGGCAGCTCTCAGGTTCTGAGACCCAGAGCAATTTMGTTCAGTCCTGAGTTCCCTTTTCTCTTGAGGAAATGAACTGAACAG
8118	7	28.1262	33	G	A	TGCAGGCCAGAAGTCTAGAGTCAAGAGAGTTGRCCCCACTGAAGCAAGTCACTCTAATGACATCACCTTCCCTGAATCACTTCCATAGAGGCCCTG
5128	7	28.1262	50	C	T	TGCAGGAGAACCTGAAAGATATCATGCTGCAGTGACACAGCCCCTCTGCYGTCCTCTCGTGGCCTCCGTGGCCCATGGTCACATGTCTCTGGTGTG
6445	7	28.1262	85	G	C	TGCAGGCTGCTGGCCACACAGGCAGCGATCTGCATGAATCCCACCCGCGGACCGCACGCTCCTCCATCCATTCATCCCTGGCCTSGCAGGGTGGTT
8781	7	29.757	92	C	T	TGCAGGTCCAGGCTTGAGGCTATCTTCGCTCCTGCAGCTTTTGCGTTGGCTAAGTTAGATTTGCTGAGCCTGCGGGCGGCCGAGGCCAGAGYTGCC
16116	7	29.757	47	A	G	TGCAGGTTCTTATGACGCTCCAGCTGCACCTGACGGAGAAGAACCTRTATGGGCGCCTGGGACTCATACTGTTTGACCACATGGTCCCAATTGTAG
7692	7	30.2948	16	A	G	TGCAGGACGCATGCARATGGGCATGTCAGTGCTTGCCTGTGGTGCAACTCAGCATCCAACTGTCGCAGTTCAGGGCCTCCATACCATTAACAAGAG
6448	7	30.2948	72	C	A	TGCAGGGCTTATAGGAAATGCCTGACTCTTGCAGCTCGGTGCTGGAAATCCTTCTTCTAGAAAGGGGACCCMGTGACAGATGGCTACAGCCATCCG
2511	7	30.8298	22	A	G	TGCAGGTTGTTTCTTCCCAATRTGCATTTCCAATTCTCCCTCCCACTTCCTTTCCCATCCTCCCTGTCCAGCTTGTGTTTTTGGCAGGGATGGGGG
3062	7	31.9138	91	C	G	TGCAGGCACTGGCCCAAACCCAATTAATTTAAGTACCAAAGTGACATTGTTAATTTATTATTTCCATTACCACATCTGTGAAGTCTAGGASTAAGA
1815	7	32.9977	61	C	T	TGCAGGGGAGAGCAGGCCTGTGTGTTGCTGAGGGCCACCAGCCTAAGGGTCCCTGCCCTGYCTGGCCTGGGCCAGGTTCACTTACCTGGGAGATGG
13932	7	33.5575	72	A	C	TGCAGGACACCTGGGAGCTCTTTCATGTTTCTTGGAGGTTCAGGTGCCAGGGTGCTCTCCCACACTTCACAMAGGAATTATGTTTGGGAGTACTTC
15676	7	35.191	47	C	T	TGCAGGAGCACATGTCCTTCCGCAGGAGGAGGCTGTTGAGGGTCACYGCCCCGATCAGGTAGAACAGCTGCTTCACGGCCTGCCTCACGAGCTCAG
8169	7	43.3858	41	G	A	TGCAGGACACCCCCACCCGACACACACATGCACACCTCACRCGCACAAGGTCCACGCGCAGGGGGACACGCACGGACACAGCAAGGACACACACCC
8994	7	43.8849	44	G	A	TGCAGGCCTCCACTAGTAAATGTTACCATTTAGGCTCTGCATCRGTAGCTCTCATATGCCTTTATTCTATCAGCCATTGCTACTGTTTATACACAC
8605	7	43.8849	17	T	C	TGCAGGTGTACAGCTGYCCCTTCGAGACCACCTTTTCCTCTGATGTCCTTGGTACTATCGCTTGCTAGTTCTGTCTCCTCTAGCTCTTACCACATG
11573	7	44.4366	33	T	A	TGCAGGAGATGTCATATTTGCATACCTCTGAGWATTTCTCCAAAGTTAATTCCTAAGTTGACTTATCTGCATCATGTACATGATATGTAGTGCTTT
6794	7	46.09	39	C	T	TGCAGGATTGCACCTTCTCATCTAGCGAGGTCGTCTGGYGGGGATTGAGGGTGGAGGGGAAACAGGGTTTGTATCTGCTCAGATCCAGGCAAAAAA
3070	7	48.2791	57	G	A	TGCAGGCTGCTTCATCTTGGGCTGTTCGAACTCAGAGGGGGTGTCCAATTTGATGARCAACACCTATAAAGCCATTCACAGTGTTCCGCCTGACCT
13546	7	48.2791	26	T	C	TGCAGGCAGCCACTGTTGAGTGAAGYACCGTGAGATTCGACTTAAATTGAACTTGAATTCTGTTTGCCTCCCTTCTTTCCATTGCTGTCTCTCATT
14711	7	48.2791	13	T	C	TGCAGGAGACAAYAGCCAGGGAGGCTGGGAGACTTAGGAACAGTCAATGGAATCAGCCTCCTGTGCTCCTCTACGGATCCTAATTTCTCCCCTTCG
7414	7	48.2791	26	T	C	TGCAGGGGAACTTTTCACACATACAYACCTCTATGGATGCCTCTTGCTGCTTTAACTTCCAGGGGCTGGATGGACGGTGGCCTCAGCTCCCTGAAA
8440	7	48.2791	79	T	C	TGCAGGGGAACACTGGGTCTAAGTGATTGTGATCTACTTACAGTCACCCCACAGAAATGTTGACTTGCTGGTAGTAACYCTTAATCTTTAAAAGTG
12111	7	48.2791	92	C	T	TGCAGGAAATCATGGACTCATTGGTGCTAGAGGAGCCTGGAGCTGCTGGCAAGAAGCCTGCCGCCACATCCCCACTGTCACCAATGGCTAAYGGTG
14168	7	48.2791	79	T	C	TGCAGGTGGGCAGGTGCCTGGGCCTGGTCCAGCGACGGTTTGCCTTTTGTTGTTCAAAGCTCTGGGCGGTGGGAGCTAYGGCTTTGGCCTGGTGCC
7927	7	48.2791	40	G	A	TGCAGGCATCAGGCATAGCCCTAGGCCCTCAGCTGGCTTRAAACACAGAGGCCAGAGAACAGGGGCAGTATACACACAGTCAACACCAGCCGTGGA
2372	7	48.8167	39	C	T	TGCAGGGCTGCTGGCAGCCTGCTCATTCTTCAGGTGCAYTTGTGCAGGACCATAGCTTTATCAGAGTCTCAGCAGGAGGTATTTGTCACTTCAGAG
4039	7	49.1828	42	G	C	TGCAGGTCCCACAGCCATGCCAGCCCCAAATAACACACAGASATGCTGTATTAGATACAAGGCTGTTAGCCTGTTACTATCATTTCTTATTAGCTA
5645	7	49.7253	63	G	A	TGCAGGGCAGTGTACCCTGACACCTTTCTGTATGCCACCACAACAGGGGCTTCCCACCAGGARGCTCTGCTCCTCTTTATCTACCAACTAATAGAT
2713	7	51.1883	92	G	A	TGCAGGCGGACAGCGACGCCGACAGCATCAGCCTCGAGCTGCGCAAACCCGACGGCACTCTCATCTCCTTCACCGCGGATTTCAAGAAGGTRAGGC
2146	7	53.9349	49	T	A	TGCAGGTGATCAGATCTGGCACATGGGTTTCAGCATGTAGTAGCCCTGWCTTGATGGAGCAGCTGAATTCTTCTTGGAAGAAGACATCTAAATGGA
8798	7	58.4174	71	T	A	TGCAGGCTAGGGAAGGAAGCAATGAGGGAGCTGCTCAGGGGCAGTCCTGTCACATAAGTAAAGTTTCCTGWCTACTAGGCACCAGAAGGCCAACTG
4453	7	58.4174	54	G	A	TGCAGGTCAGAACATCAGGCTCCACCAAGCCTAAAAGAGAGGAGCCAGGAGATRTGAGAAGCAACTGCCTGGTTCCCTCTGCCCTGCTCTGCCCCA
13131	7	58.9439	38	T	C	TGCAGGGATGGACTGTGAGTGGAGTAAACCTCTCTCTYTTGCATGGTTTTGTTAAGGACACGAACATTTCATGACAGTAACAGGAAGCAGCAACTG
12521	7	61.7037	42	C	T	TGCAGGAGAACCACAGCCCAGTGGAGATGCTTTAATGCCTCYTGGGCTCTGCCACTACACTTTGGCACCTGTTGTGTGGCTTACCTGTGGGACAGT
567	7	61.7037	37	T	C	TGCAGGGGAAAATCTAGGTGAACTCCAAGACTCAGGYTCTGGGGCAGCCCATGCCACTCGCAAGTCCCGCTGGCGTGCGCGCGTGCTGCACGTGGA
9207	7	61.7037	58	C	G	TGCAGGAATTGGCCCTGCCTTCCCACCGTGTGGACCCCAGGGAACATAGGTCACCTASCTTGGCTGCAAGGTGCCTATCTTGTCTCAGACAAAGTA
1178	7	61.7037	52	C	T	TGCAGGCATGCTTCATCGCTGGGATGACAGCCAGAAGTACCTATCAGACAAYGCTCACCTGGTATGTGAGGAGACAGCCAACTACCTGGTTATCTG
5392	7	62.7793	23	G	A	TGCAGGTGTGCTAATCAATCTCRCCTAAATGGATGACAGTTATAGTTACTATTCACTTTGACTCATGATGACCCTGTAAAGAAACTTTGTACTTTG
11201	7	64.96	18	G	A	TGCAGGTTCTAGGGTATRCAGGAGGTGGCGTGTTCATTAGCTCCTTGCAGTGATGGGAAGTTGTCATCCTCTCTAGGAGGGGACATTTTGACCTTA
3127	7	69.4586	80	C	G	TGCAGGGGCTGAGTGGCAAGGAAAACACTAGCAGCTGCTTTGAGGGGCTGCCTCTCGCCTCACTGGATCTGGGCAGACGSCCTTCCCTTCTCCTAG
13598	7	71.6419	20	G	T	TGCAGGCTTTTCACCTGTTKATCAGCCACAGAGTCATGGATACATGGCTGCCTTTTCTCCCATGGTTCTTGCACAGTGGAAGGTGAGCCCTAGTGT
15811	7	72.1683	79	T	C	TGCAGGGGCCGCCAGCGAAGCGCTCACCTCCATCGTGGTCCTGGCCTCAGGCTGTGCCATGCAACTTCAGCTGGATGGYGTCGACCTGCTGCTGGA
3780	7	73.2652	13	A	G	TGCAGGGTCACCRAGTCACAAGGCTAAGGGGGCACAGCCTGTGCCTGCTTCGCTTTTGACTCATGTCCTGCCCCTTGTGCCTGTCCCACCAGGCGG
7587	7	74.3508	41	T	C	TGCAGGTAATTCCTTACCTAGTGTGACTGCTCTTTTATGCYGCTTGGATGTGAGCAGTGCTGACTAGTTTACCCTTCAAGTCTCTCCTCTAGAGGA
4288	7	77.1197	88	G	A	TGCAGGTCAAGAAGAGACCAGGTAGGCAAGAGTGTGATGGCCCCCGCTGTGCCCACTGTGAGGGACAGATAGCTTCCCTCTGTCATARCCTGCCTC
1910	7	77.6434	74	C	T	TGCAGGAACAGCACAAGAAATAGCTCAATGCCCTGACATCACAGGACAGGCAGCCTAGAAGTAATAGTGACTTYTAATCTCAATGCAGGACAAAAA
4586	7	78.7301	11	G	A	TGCAGGTGGGRATCCCAGCTCTGGGCTTCTCGCCCATGAACCGCACACCTGTGCTGCTGCATGACCATAACGAACGACTGCATGAGGCTGTGTTTC
15060	7	79.2753	18	T	C	TGCAGGCCAGAGGAGGGYACCAGGTCTCACTACAGATGGTTGTGAGCCACCATGTGGTTGCTGAGAATTGAACTCAGGTCCTCTAGCAGAGCATCC
5688	7	80.3722	77	C	T	TGCAGGCAGGTGACCGCGCTGAACACACATTCTGGCACCTGCGGGCAGATGGGCGTGTAAGTGGACCGTAATTGGCYTGAAACGGGCTGGAGGTCC
2665	7	80.3722	29	A	G	TGCAGGTGCTGCTGCTGGGGACTGGAGARGCTGGGTCAGGGTGGGGTCGGGACTAGCTAAGGTACTGGTACTAACCTCCACTCAATACAGGATGAG
15179	7	80.3722	49	T	G	TGCAGGAGAGACTATTGCCTCTGAAAGCCAAGCCAATTCTGAGTGCAAKGGAGAAGCCATTTCTCATATCCCAGCTGAAGTATGGGGCCATGGAGT
7349	7	80.3722	17	G	C	TGCAGGCAGAGACCATSTGTGAGTTCAGGGCAGGAAGGAGGTGGTCTGAGGCTGGCAGACACTCCCACCCAAGAACAGGGCTACTTACGAATGAAG
9483	7	80.3722	51	C	T	TGCAGGGCAAGGCCCTGGTACCCTGTGTCAGGGGGATCTGGGGTACCGCAYCCTTCTAGAGAGCATGAAGGACCTTGGGGTGGGGGGCAGGGCACC
6342	7	82.5523	57	T	C	TGCAGGATACAGTCAGGGTTGTTCAGTAACAGCAGGGTCTCTGGACCCATGGAGGGYGGGTGGTATAGCCTCTGCTGCAGGGAATGCAGGCTCTGC
4187	7	85.9545	49	T	C	TGCAGGTTCCTCTTCTGTATGCACAGCTCATTCGCTTCACTCTACCTGYCAAAAGGACAGTGGCGGATGATGACAGTCTCTAGGGCAGGCCGCTGC
11225	7	86.5419	28	G	A	TGCAGGGACTCCAGAGGCAAGCCGCATRTGGACGTTTCTGTTTACAAAGGCTTCAAATGATGCAATCGGTGGATTTAAAGATTGTTGTAAAACAAT
1278	7	86.5419	21	G	A	TGCAGGAAAAAGCTGGCCTCRGTGTCGCGCGCCTATAATACCAGAGGTGGGGAGGTGGGACAGTGGGATCCCCGAGGCTTCTGCCCATCTAGTACA
6608	7	86.5419	27	C	T	TGCAGGCAGCTTGGCAGGTTGGAGAGYCCTTTCCAGGTGCCTCCATTGGCTGATTTCTATCTCTTCCAGACAGCGCGGCTCACTCTGTGTCCCCAG
13633	7	86.5419	14	T	G	TGCAGGGTTGAGGKGGGGAGGCCTGGCCTGATTTCATTGATGCTTGGTGTGTGGGAGGATCTGGACTCAACTTCAAGCTGTTATGAGAAATCTGAG
3026	7	87.6228	14	T	C	TGCAGGCCTAGGAYCCCAAGGACACAGACAGGCCAGAGTAGCAGGATCTTGGTTTCTAGGCTAGCCTGCCGCAAGGAAGAAATTGCCTGTGGTAGG
6694	7	88.7058	53	A	G	TGCAGGTCCCTCAGGTGGTTCTAAGTCAGGGAATCCTTTGGAACTGCCTCCTRGGTAGCTGTCCACCTCACGGTAGTGATTCGAAGTCACGAGGAA
12740	7	89.4409	52	C	T	TGCAGGGATAAAAAGCCTCAGACACTTACATGTCACAGTCTCACAGTCCCTYACCAAAACGTTCCTCGGTACTGACTACTCTCCAGCCTGAGCTGA
8120	7	89.4409	50	G	A	TGCAGGAGCTGGCAGCATCCTCTTCTACATAAGTGAGGTCTTGTGACTCRTAGGGAGCCCCAGAAGCACTGATAAGGGTACAAGGAACGAAATGAC
7837	7	89.6273	57	A	T	TGCAGGCCTGGCTCTGCTGCTGACAGGGGTACTGGCACTGTGTGCGCTGGGATCTTWTGGCATTCTCCGTGGATAACTGCTGTGTGAGCCTCAGAC
10205	7	91.8168	13	A	T	TGCAGGGACTCAWGTGTGAACACCGTGTTTTCCCAACAGATGGAGCTGTTTAGGGAGGCTCTGAGCAGCATCCTTCACTGGGAGAGGTAGGACCAC
7060	7	94.6369	50	C	T	TGCAGGTGGAGTCTCCTCCACCTCTTAAGGTGGACCTTCAGGGCCTTTGYTTTATCCGCCTCAGAAGTTGGCATGCTGAGCATTCTCCAGAGAACT
14531	8	0	41	C	T	TGCAGGTGCGGATGAGCAGCTGCCTGTGGGTTGCTGAGCCYAGGTGCAGTAAGGAAGGGTTGCAGAAGAGGAGGCTGGCAGCAGAGCTTCCGAGAT
8370	8	2.0051	91	A	G	TGCAGGTATGTGTAAGGGTTCATGACGGGCACTTCTCTGACCAGTCTTCTAAGGAACTTTCCCTTTCATGCGTTTCTGGCAACAGGAGGARCCTGT
10752	8	2.84707	66	C	T	TGCAGGCCAGGGACAAGGGCAGAGGCAGAGGCTGGCCTGCCGTGTGTCTGAAACCTTAAAGGTTAYAAACCGACGTGACAAACTATTAGGGTGTAG
12922	8	3.76507	40	G	A	TGCAGGCATAGTTTCTCACGGGAATTGATCCCACCTCCCRCTCTGCTACCATTAGCATCGATGCTGCCAGGCCCTACAAGTTTGTCTCCCTCAGTA
1909	8	3.76507	28	C	T	TGCAGGTCATGGGAAAGGAAGGAGGCTYGAAAAGTGGGATGGACAGTTGCAAATAGAAAGACAGTCGACTATGCCTGGGAAGGCCCAAGTTCCTTC
6063	8	5.22614	45	T	G	TGCAGGTATGTATGTCTTATATGTGAATAGTGACCTGAGAGGCCKCGGAGGTGTTGGATCCCTTGGAACTGGAATTATAGACGGTTGTGGGCCCAC
2393	8	5.60374	85	C	A	TGCAGGAATTTTTCAGGGGACTTGAGTTACATCCCCAGCACAAGTATCAGGCAGTTCTCAACCTGCCTGTAACTCTAGCTCCGAMGGATCCAACAC
13867	8	37.9779	88	C	T	TGCAGGAGGGATGCAGTATTTTCCTTGTCTGCCTCTGCTTGGCTGAGAAATCCTGGGAGTGCTTTGGGACTTGGCGGCCCCTTGCAGYTCTGCAGT
13171	8	40.0233	55	T	C	TGCAGGGCAGCTCTTATTATAGATGGCTGTGAGCCACTGTGCATTTGAGGGAATYGAACTCAGGATCTCTGGAAAGGCAGCCTGTGGTCTCAACCT
5164	8	40.5755	13	A	G	TGCAGGAAGTGCRGGTACCCAAACTGGGGTGGCTCCAAGATGGCTTATTTGGTGATAACACCATTATCATATAGTACCCTTTTAGATTCATCTGCA
11700	8	43.4159	60	C	T	TGCAGGGGACAGAGAGGAGGGTCTGGGGGATGATCAAGGCCTGGTTATCCACCACCCAGYAGAGGAACAGTCCCACCGCTGCCCACTGTGTGGCCA
10132	8	43.9761	40	T	C	TGCAGGGTGTGTTAATGGCAAGTGGCCAGTGGGGACATCYTTTTCCAATTTTTTGTTTATGAATTATTCGTACATGTGTGTTATCACAAGTGTGTG
972	8	43.9761	32	T	C	TGCAGGCTTGGGGACAGAGGTGCGGGTGCCCYAATAAAAGAGGGTGGCGCCGTGGGGCCTGTGAGAGCTTCTCGGCCAATCAGCCCCATTTATCAG
8969	8	44.5138	52	C	G	TGCAGGAGTGTTTTCTGAAATGCTGCCCCTTTTGCCAGGTGGGGCTTTGCTSTGAGAGAAAGGTCTTCCCTTGAACCTATGCCCTGGGTTTTGTTA
6552	8	45.0515	47	A	G	TGCAGGGCTTCCTGTGAATGTTACATGATCAGAGAGAACAGGTGGCRGGCACTGTCCATGGTTGGGTTTCTGAGGGCTGAATTGTGTGTTGAGCAG
6999	8	45.0515	41	A	G	TGCAGGAGGAGGCCTGGAAGTGTAGTGTGTCCCCTTGTTCRGTTAAGTCTGGAGGACCCTTGGCCTGGAAAGGGGGACTGAAGAACTGGTAGGCCC
3497	8	46.1313	38	C	G	TGCAGGCAGAAATGCGGTGCGGGTAAGCGAGGCCAAASGAATCCACTCCAAGTGCCTCCCTCTAGCAGACTTTAAGCTGGAAACCACCCTCCTTCC
8782	8	47.4392	14	T	A	TGCAGGTGGCAGAWCAGTGAACCATGAAGAGGTGAGAATGAAACCTCAGTTCAGATTGACCTCATAGACCTGAATCAAGATTCTGGGGTATCTGAT
10568	8	59.9378	64	A	G	TGCAGGTGATTGAGACTCTCTCTCCTGGAGAAACGTGAAGGGACGCTGCTGGCTGAGTGAGCARGATCTGCCCCAGGGAAGCTGTAACCAGAGGCA
6723	8	60.9556	58	T	G	TGCAGGTAGCACCTTTCCAAGAACTTCTGGAGCAATGCTTTATGAAGACCCAGTGGCKATTGTTCCCTGCTGCAAATACAGTGTTTAGTGGGCAGC
5400	8	63.1833	38	A	G	TGCAGGGAGAGAGATCTCTGCTTGCTTGGCACAGTGCRGGCCCTACCTCTTTTTGTTTGGGTAAGAATTATTCTTAGAAATGTGCACTTCTTCTAG
3795	8	63.7397	12	G	A	TGCAGGGTGCCRCTGCTGAGCAGGGTGAGCCTGCTGACAGCAAACACAGCAAGTGGGTTCCGTGGAGCTGAACGAGCTGAGGAGTCGGGCCACAGT
1269	8	64.2661	13	T	C	TGCAGGGGTGAGYACGGGTAAGGATGAAGCTTTTCTACTGAGTTGCCAATCTCAGCCCTTTGATGTTGGTCACAGCTACCTTCTCCATGGCATGCA
6722	8	67.0112	22	A	G	TGCAGGGAGAAAGCAAGCCTARTAACAAAAAGTGTAGACTCCACACAACCCCTGACACAAGCCCCCATGTAGTTCATCCCATTTAATCCTCACAGT
9679	8	67.0112	46	A	G	TGCAGGTGTGTAATAGAAGCAGAAGAGCAACGACCTTTATATCCARTATGACCTGAAACCCATGTGGGCTCTTCAGCCCTCCCAGTACGGGGACAG
769	8	69.8469	80	C	T	TGCAGGACAGTGAGTGCTCAGCCAGAACTCGTAGGGGCTCCCGACCCGAGTGCCAGATAAACAGAGAGGTCAAAGGGGAYTAACGTGCCCGCCCTG
4471	9	0	62	A	T	TGCAGGGCTGCTTTCTGTGGCGGCCTCTCCAGCTGTGTGTCCTTGTGTGGTCGTCCTGTGCWTAGCCTTCTTCATCTCTGTCTGTATCCAGGCAGA
4921	9	2.24597	22	C	G	TGCAGGGCCAGTAACTGTAGASCAGCTGTGTCACCTCTGTCCACCCTGCCTCCTGCACGTTGCGAGTTTCATTTTTAGCACACAAGAATTCACTCA
6325	9	2.24597	58	C	T	TGCAGGTGGAGTGTTCCGATCTTGGCGGAAACTGTTACGCAACACCCTATAAAGAGGYATAAGTGGCAAGAAGGAAATCAGAAGGAATCCAGAGGT
13253	9	3.86247	56	G	A	TGCAGGTTGACACCCAAAATGGCCCTCTGTCTACCACTCACATGCACAAGGGTGCRTATATGCCTACAAACACACAAACACACAAATCATCATGAT
3784	9	8.24806	57	C	A	TGCAGGTCTAGATGTTCTGAAGATCGTCACACTTACAGGACAGCAAACACTAAAGAMTCTCAGAGTGGATCACTTGGCTCCCCAGACCTTACCAAG
11698	9	32.9106	16	G	A	TGCAGGACACCAGGCRCTAGCCACTGCCCTGCCACCCATGGACCAGTGTTCAGTAAATGAAGTGTTTGAGCTCAATTATTGGGTCATTTGTGTGGT
7103	9	34.4261	19	A	T	TGCAGGCCAGCAGAGGGCWCCAGATCGCATTATAGATGCTTGTGAGCCACCATGTGGTTGCTGGGAATTGCTCTCAGGACCTCTGGAAGAGCAGTC
7884	9	34.4261	21	G	T	TGCAGGATGTCGATCCTGTGKGTCTGCCGCAGGTGAGACACCACTACCTCCAGGTGGCCTTCCCAGTGGCAGGAGAAGAGTGGGCACAGGCAGGGA
518	9	34.9639	23	C	T	TGCAGGGAGCATTCTTACTGCAYGGATGCTCATGCTATCCAATTTCATGTGGCCAGCCTTCTGCAGTACTGTTTCAGGGAAATCACACAAGTGAAG
8827	9	34.9639	54	T	C	TGCAGGTCAGATGCCTAGCCCAGACAGTACTAGTCCAGCAGGAAGTACAGATGYTTGTGCCTTCTCCCTGCTGGGAGCCTGGTGTAGCCACACTGA
15817	9	36.0455	15	C	G	TGCAGGTGCGACCTSTGGGCCAGGGAGAGACTTTGGGAAGTGTTAAGTAGCTGGTGTTGAGGCTGTGAGGGAACTTGTGGGTCATAGGACTGAGGG
6277	9	36.0455	76	G	A	TGCAGGCCAAGGCCTGGGAGGGGAGGCCCTGGGACAGGGAGTTCAGTTGCCTGAGAACAAAGTTGCCTGGGACTARAGAAGAGGAGGGTGTTTGCC
12882	9	37.1298	57	C	T	TGCAGGCTGTGCATCGAGAGGTCAGACCTGTGAGAGAAGAGGTATAAGTAGGGGGAYGGTCACCAGAAGGATTCAGAGTTTTAAAGTTAGGATCTA
3811	9	37.6648	39	C	A	TGCAGGGCTTGCTGAAACCATCAGGTTGGGGTACCACAMGGGTGTAAACGAGGAAAAGAGACTTTTGATGAGACAGGAGCGGGAATAGCTCAGTGA
7986	9	38.2024	57	C	T	TGCAGGGCCCTGATTCACACAGCCAGAATCACTCTGACATGAATGCAGGCTAATTTYCAGGCCTTTGGAAAGAGGAAGAAAGGGTAGTTCCTTGAT
6959	9	38.7401	73	G	A	TGCAGGAACAGATGAGAGCTGAGGTCACCTGGCCCTTCATCAGTGAGGGACGAAAGCCTTGATGGGCCGCGCRGATGCTTGGGACAGACCTGGCTG
16457	9	39.275	28	A	G	TGCAGGGCAGCTAGCTTGGCACACACGRCACAGCACACAAGTAGAGGTCAAAGGACAAGCATGGGTATTGGTCCTTATTGTCCATCAAGTTTCAGA
8550	9	40.359	21	C	T	TGCAGGGAACGGAATGCCGCYTCAGAGCACTCCCGCTGCAGGGAGGGAACTGGATGGAATCCTCTGCTCGAGGCAGTAGCTCCGAGGGCAGCGACT
12812	9	40.359	65	C	T	TGCAGGAGGAAGAAAGGCCAAGGTCCTGGGACAGCCAGAAGAGGAACTTGTCTCCCAGGATTAGYATGCAGACGACCTTACAGAGAGATGGAGCTG
15993	9	40.359	24	C	T	TGCAGGACACAATGACCAGACTCYAGATGGTAGGTCTTGAAGACACCAAGGATGGGAACACCCTTTCAGTTTCATGATACTATATGAACCATCCTC
3936	9	40.359	89	A	C	TGCAGGCGAAGTCCACGAGCATCACACGGCTGAGTGCACCATGGGGCTCACATGGTCATACTCAATCAGATCGTTCCGATTTAGTGTGMTTTTGTC
2	9	40.359	67	A	G	TGCAGGCTCCGAAGGTGGTGTCCTGCTAGGCAAGACTCATGGGCACACACCGAGATGCTTTATTTARAAAACAGTTGCTAATAAATACAAACCACC
12091	9	40.8966	44	C	T	TGCAGGATTCAAAACCTCTGCGGGGGCGGGTGATTGGCAGGAAYGGTACGACCCTCTCCCCACATACAGCTGACGCTGGAGCAGCCACAAGGGGAT
7464	9	40.8966	47	G	A	TGCAGGGCTTCCAGGCAGGGCCTGGTGGGCAGGGAAGTCCCCCAGARGCATCCCTCCCACCCCCCTCTGTAGGGGATAAAGAGCCCAAGACCAAGT
2609	9	40.8966	11	G	A	TGCAGGAGATRGGGTTGGCTAGTCTGTTAAATCCAACACCCCCTTTCCCTCTCTTGCCTCCATTTTGAAGGCTTAAGGAAATATGGTTTAAGCTGG
4533	9	40.8966	34	A	G	TGCAGGGCTTTCTTTGACCTTCAGTGCTTATAARTGTCCTTAGCAAATCTCTGGAGAGAACTCCCTTGACTGGCCTGACCCTGCTGTCTGTCCCAT
11746	9	40.8966	83	A	G	TGCAGGCCTTGGATGATAGAGGTCTGCACAACAGGGTAGGAGTTGAGAGCAGAGTCGGCTGCCAGGGTAGCATGGGCTCCAGRTTAATGAAAGGAC
7622	9	41.4343	21	G	A	TGCAGGATAGAGCTGGAGAGRCACTCCCTGTCCCTGATGTTGTGGTTGTGCCAGAGGACAAGGATGCCGTGGATGATGCACTCAACAGCCCCTACG
16009	9	41.4343	73	C	T	TGCAGGTCTCCGTGGGACTTTCCCTCATGTTCACAGTGTCCAGCAGGCTGCTTCTCCTGCTGGGGCCCAACCYGCTAGCTATCTGCCTGCCTGGGC
1071	9	43.0621	39	A	G	TGCAGGTCATTGCTCAACACCCTATCTCTTCACACATARGCCCTAGCCAACTTCTTTTGGCCTGAAGAATGAGGCATCTTCAAGGCTGGCTCCCAG
2359	9	45.2575	31	T	C	TGCAGGGGGCCTAGGTTAGTCCCATGTATGYCCCCTAGCTCTCAGTCCAGAGTCCCTGGGCTGCCACCAGCTCAGGTAAGCTCCTACGTTTTCCTT
6434	9	46.333	11	G	A	TGCAGGGGGCRTCTGTTTAGATGGAGTGGGCACAGTTCTGCTCTCCACTGCGGCATTTGCTGGGGAAGAGACCATCCCAAGCAAAGAACCTGATGC
15116	9	46.333	47	T	C	TGCAGGAGCCCCTTTGCTGGACCACTCTTCTTGCTGTCCAGTGCATYGCAGCCTTTGTGCACTGTGGAGCTGTGTGACTTCAGGCAAGTGACTGTA
13762	9	46.8708	28	G	A	TGCAGGTGCACACTCCAACAGGACTGCRCCAACTCCAGTCAGCCGCATTTCTGGACCAGTGCCAGTGAGGGCCCTGGCCGCTGCCCTGCCATGACA
3843	9	47.4057	69	T	C	TGCAGGGATAGGGCAAGGATTGTGAGCCTGGGCTGGAGGGACTCCTATAAACTCAGAGGGCACTAGGCYAGGTCACTTCAGGCAAGAATATTCAAC
14186	9	48.4838	51	A	T	TGCAGGGGGCGCCCCTCGACAGATGCCTTGCTGTGAGTCTCACGCAGCGCWGGGCTGGGCAGAGGCTTCACTTCTGTTTTCCCGTTCAGCAATTGT
14574	9	50.718	56	C	T	TGCAGGAGGTGTCAGCCATGGGGACAGAGTGAAACTGCTGTGAAAGGCTGAACACYCTTGAGGAGCCAGACCCCTGTGTGGCCGAGATACAGCAGC
10351	9	52.3875	87	G	C	TGCAGGCTTCCAAAGCCTGATTTCCCACCCCAGGAAAGGGTGGGTCCAGCCCAGACAGAATGGCTGTTTGAATAATGACTTCAGGGSAATTATTGT
1315	9	53.4658	83	A	C	TGCAGGGGCAGCAAGCAGTATTTCCCCTCCTTCCCACAATTCCTAAACTGTGGGCTTTTTGCACCCCCTTGTCCCTCCCTGGMTCCAAGATTTTTT
2032	9	54.5469	69	C	A	TGCAGGATCCTGAAAAGACAACCTTGGTTACTCTTAGCACCACCCTCAGGGGGACAGTGAGCCTATGGMCAAGGCTGGGTTAGACCATGCTGAAGA
4513	9	54.5469	65	T	C	TGCAGGGACAGTGAGCTTAAGAAGGGAAAGACAGGGGCCAGAGATGAAGGAGCAACAGCACTGGYCAGGCCTGCTTTGAAGACCCTTCTGTCCATC
10975	9	54.5469	78	G	A	TGCAGGATGTAGAACTCTCAGCTCCTTCTCCAGCACCGTGTGTCATCATGCTGCCCACCATGATGACAATAGACTAARCCTCTGAACTGTAAGCCA
2878	9	55.0886	53	C	T	TGCAGGCTGTCCATGTGTATAGGGATGACCTTGGAGGCTGACAGATCACTATYGATCCCTCCTCTAGGCCAGGAGATACACTTAGAAAGTCAGTTT
13190	9	56.7711	22	A	T	TGCAGGTAAATCAAGTTAAGAWCTACTTACTGACAGGGGCTGGGAAGTTGGCTCAGTGATTAGGAGCACGTGTTGCCCTTGGAGAGGAGCAGCTTT
1565	9	57.3337	58	C	G	TGCAGGGATCCCACATGCCTCTGGAAGCAGGTGAAACCCCTTCTGGCCTCAGCCCACSCAGTAGGTACCTCTGGCCACCAATGCTGCTGCACCTGC
9480	9	57.3337	17	C	G	TGCAGGCTGCTGTCTASAGAAGTCACCTGCCTGTAGAGGAGGAGAAGGTAAAACCTGAGACCTGGAAGCCACAGGGTCTAGACCCATTTCTGTCAG
10392	9	58.4149	18	C	T	TGCAGGCAAGCTCTAGGYCTTCACCAACCCTAAGACATCATTCATGTCAATGAACTACTGGGGTTACCATAGATGTGTTCTACAGAGTAAAGCCTA
6060	9	59.5053	41	G	C	TGCAGGGACCAGAAGAAACTGCCCATCCAGGAAAATAGAGSTGCTTGTCAGGGGGCAGAGGTGGAGGCCAGGGCCTCTGTCATCATCAGGAAGGGG
11775	9	60.0382	21	T	C	TGCAGGAGACTGAACACAGAYAGCTAATGCATATACTGCAACAAACAATGCAGCCACTTAGCACACAGAAAAAGAAAACAGAAGACAACAAGCCAG
1323	9	62.2391	24	A	G	TGCAGGTCTGAGGACCTGGGTTCRGGGCTCTGGAACTCACACAAAAAGGCAGACATGGTGGTGGTGAGCGCGTATAATTCCAGAAATGGTGAGATG
7764	9	63.3118	45	G	A	TGCAGGCAAAACACTCCTCTGCACAACATACAAAGACATCTTAARGATGAAAATGCTGTTCATAGAGCCTAAGAAATGGAGGCCACGGCGGTCTCT
1413	9	64.9608	22	T	G	TGCAGGGTTGGTGATAGAGAAKAGATGGGGTCCTGTGTGGACCCTGTCAGCCAGGAGCCCTGTGCTTGGCTTGCAGGGAGCAGAAGGGAGAGAGGA
5590	9	65.497	45	G	A	TGCAGGTGACTCACGTGGGGAGTGAGCCACACACCAGCTCATTTRCTATGACATTGTCTGTCCCGCATAAAGCCAGGAATAACCGACGTGTGCATC
15865	9	67.1333	44	A	C	TGCAGGGCCATGAGGAAGGCTACACATTGAGTGAAGAAACCTCMATATGTCCCAGTCAAGCTGTGGCCTGGGAGGACCCACAGGGCCAATGAGGAA
13632	9	67.1333	69	A	T	TGCAGGAACTGAGCTCATAAGTCTTCGCCCCTCACTGCCTTGCTCCGTGCATTGTTCTGCTCTGACTGWAGATGCCATTTGTTTGTGCATCTCTGG
13489	9	67.671	33	T	C	TGCAGGGGGCGTTTCCTCAGGAAATGTGAGTTYCTGGGCGCCGTGGGGGTCCGTGTGCGCTGCCGTCCGCGCTGACACGGTGTCTGAGGGCGTGGG
10296	9	68.2086	83	C	T	TGCAGGGACGCCCCTCAATCAGAAAATGAACAACTCAAAATAGCTTCAGGAAGTCCCTGAAACTGACCAGATTCATTGGACCYCCACCCTCCCAAA
13140	9	68.2086	52	G	A	TGCAGGGGGGTGATGTGGGACAGACAAGATTAGGGACAACTGTGACGGGCCRTGACACACAGGAATGGGAGAGAAGCACACACTGCCAGCAGCATA
480	9	69.3547	64	G	A	TGCAGGTGGCCTGTGTATTTAGCTAGGTTGTACACCTACAGACATTTCTCCTTTCTCTTAGGTRATGTGGTTTGTGCTCTGAGGCAAGGTCTTACC
2707	10	1e-07	55	A	T	TGCAGGCTATGCAGTGTGCTACAGGTGTCCTTCTTTTGTAAACTGTCACCCATGWTTTGGGAGGGCATTGGCAATACATCTGTCATTGAGTCATTT
16164	10	0.56123	79	A	G	TGCAGGACCCAAGATAAGAGACTCCTATGCCCAGGCCACTCAGCCCAGTGGCCAATAGGTAAAACCGAGCCAACTCTTRGGTGTCCTCCCTCACTA
7887	10	5.06578	41	C	T	TGCAGGAGCCAACCCATCCCGATCTGCTTTTCCTGAAGGAYCTGTATGTACTGGGTCAGGAAGGCTTTGTCTGTTGTCTTCAGTGAATGGTTGGTG
9122	10	7.23169	49	A	G	TGCAGGCTCTGCTGAGAGAACCCTGCCCTGGCCCTGGAGACAAAGGCCRTGGGCAGAAGGGGCCACAGGTGGCAGAGATGCGAAGTCCAATATCTT
12610	10	11.0562	29	G	A	TGCAGGAAAAGAGCGAGGAGCTACCTTCRCTCAAGGCACTCTGTCCACCGCCCAAGCAAAAACTTAACTTTTTCCCCCCTTCAGACGCCTAAGAGC
8096	10	29.8311	51	A	G	TGCAGGTCTGTTGGTGTTTCTGGATTTTTCGTTAGTTCTTTAAGGTCGCTRATTTTGGAATGCAGTTCTTCCAATTTCAAGGTTTTGTTTTTAACC
12187	10	35.4458	38	C	G	TGCAGGCCAGAAGAGGGCACCAGATCTCATTACTGGTSGTTGTGAGCAACCATATGGTTGCTGGGAATTGAACTCAGGACGTCTAGAAGAGCAGCC
14724	10	36.5036	34	A	G	TGCAGGTGGAGGGAGGGTTCAGGCCAATTAAGARTACAGGGAGAGCTGAACCGACAGAAAGAGATCATGATAGCTAGAAGATGAAACCATTAAAGC
5789	10	36.5036	13	G	A	TGCAGGAGCCAARGGAGCCCAAGGGTGCCACATGAAAAGTGCCCAGCCCCTAGGGACAAAACTCAGTCACAGTTCTCTTTGCAGAAGTCCTAGGTG
11056	10	37.5855	91	T	C	TGCAGGCTGAGCAATGAACTCCAGGCTTCAGGGCCCAAGTCTCATGGGCTGTCACTCACACTGGGGTAGGCTTTGGTGATGTGACTGTCTYTGAGT
11730	10	37.5855	66	A	G	TGCAGGCTCACCCAAGCTCAAAGTTCCTGCCCCCAGGTCCCACCTACTGGCCAGAGAAGCAGACARCAGGCACGGTGGCTTGGGGATGTCTGGGTG
5948	10	39.7622	41	C	T	TGCAGGAGGTAGAGAGGAGGGCAGATGGGGCAAGCGGGTGYATCAGCCCTTTGCCTGAGGCATATGATGGCCACTCAGGTCTTTCTGGGCAAGCGG
11296	10	43.9684	32	G	T	TGCAGGGCTCACATTCCCTAGCATGGCCCCCKAGAAGGCACAATACACCCCATCCCCCAGCGCATGTGGGCATTTTCCATCCTACCTAAGTGTGAA
12990	10	48.1805	33	G	A	TGCAGGGCTCCAATGCTGCTGAAGGCGGCCACRGTCAGCTCAGGACGACTCTTGACCAGGAGTCAAAGGGTGAGCGTTAGTTTACTTTAAAGAGGG
6354	10	49.2456	63	G	A	TGCAGGTGATTTGGCCTAGTCACACTTTGAGGACACTACTGTGATTGCCTTTGGAAGGCAACRGCAGGAACCATATTTAAGCTATATGGCGTGAGA
8630	10	49.2456	72	T	C	TGCAGGAGGCTGCGCTGCCTGAGCGTGTGGGTCTCCTGGCTCTCTGAGCCCTCGGCCTGCCCAGCAGTGCTYGGCAGGCTTCAGCTTTCTTTCCTA
9296	10	50.6938	12	G	A	TGCAGGGCCCTRGGAGAGGGGTGCTCCAAAGTGCCAGGCCCGTTGGTGGGTTTCTGTCTCTTCAACACCCCATCACTACCAGAAGACTTGCACAGC
3837	10	50.6938	13	T	A	TGCAGGTGGACGWTTCCCATCAGGTTCTGAGCTATAAGAAAGAACTCTGTGGAGGGAGTGAATGTACTGAGGATGGTCTCCCTGCTTTCTTCAAGG
16490	10	51.4109	18	A	G	TGCAGGGCTGGGAATGTRGCTGGGTTGGTAGAGGATTGGCATAGCATGGATGAAACCCTGGTCAGATCCCCAGCACTAAATAAAGCCAGTGGCGGG
10968	10	51.4109	42	G	C	TGCAGGCAGGTACAATAACTCTAAAAGCAAATAAACAGGACSCTATGTCTTCTAAACGCGCATGGGAAGCCTCGCCATTCATTTCCTCGGAACACA
2734	10	51.4109	21	C	T	TGCAGGAGCCCACTGCTTTCYGACTGTCTCTGTCTTCTCAGATCTGCTCAGTGGCCAGGAAGCATCATGACTGAGATGTTTGGCTTCTTGCTTTGA
10094	10	56.4968	91	G	A	TGCAGGACACACGATGTAGATGTAGGGCTGACACTCCATCTGTGAGTGTGGGTCCTGGGCAATGCGTCTTCCCGTGGCCTCCTCTGTGGCRCCATT
13750	10	57.0087	40	G	A	TGCAGGTCGTCACTCACTGACGGTTCCGAGCGAGATCCARCTACCACCGCGGTCTGCAGGAACCCAGTGTGGCACATAAAGCCACCCTGGCGTGCA
8545	10	58.0928	62	G	T	TGCAGGGCTGGGAGTCCTCCCCATCCTCCTCCCCCAGTCCCTTTTCTTCTTCAGAGATCTCKGAGGAACAGGGAGTTCAGGACACACTAAAACCAA
15696	10	59.1768	52	T	C	TGCAGGGGATGTACTCATTCACCAACCATGAATCAAAGAACCGTAGCACCAYAGAGCTATAGGAACACGGGCTTATCGACGTGGCTGCCTGACAGA
12759	10	59.2121	61	T	C	TGCAGGCCTCGTGCTATGGTCTGGCTCGCACTTTGGGGTAGACATTGGTAGTAGCTCATAYTTTCCCACAGCAGAATCCAGAGGCCAGTTCTGAGC
6585	11	0	31	C	T	TGCAGGGCCTCCATGAAGAGACTACCCCAGYGAGAGAACACAGCAACTTAACAGAACTTAACGCCACAGGCTGTAGGGAAGTTTCCAAAGCAACCA
12456	11	1.18952	59	C	T	TGCAGGACACGCCCCACAGCTGAATCGCGTCCCTTCTCTCTTCTCTGGGATCCTTCTGYCCTGCCCGCCAACCGCTTACCCACCAGAGCATCCTCA
6821	11	2.11045	17	G	C	TGCAGGAGGTGGGGCTSGCACCGACTCTGGAAGGCACTGGAGTTCTCTCATCTTCTTTCCAGTGATTGACCCCAGGACACAGATGAGTCCATTCCT
9055	11	2.11045	17	A	G	TGCAGGCATGCTTGCARACAGAAAACTGTGTACATGATAAATAAATAAACCTTTAGAGAATACTTTGCCCTGGTTTGTCCTAGATGCTCACACATT
16251	11	2.11045	51	G	A	TGCAGGAAGGAAAGGTCAGCATTGTGTCCCGTGAGAACAATCTCCAGGTTRCCCATCACCACCTCACACCTCTCATAGAGCTTGTACAGCGTCTGG
9173	11	4.91273	12	C	T	TGCAGGACCTAYCCAATGAGAACTTACAAGAAAGACCAAAAGTTAAAGTCAAACTACATGAAATAGCTAATTAATGATGAGGGGAATTTCATATAT
8566	11	6.57992	13	A	G	TGCAGGAAAGGGRTGGATCTGACGGCCATCGTGTGCATTAGCTACTTCCCTTATTAGTAAGGCTGAACACCCGACAAGAAACAACTCAAGGGGAGC
14343	11	9.29779	23	T	C	TGCAGGCAACTCTGATCAGGGTYCATGTGCCACCTCCTCAGGGAGGCCTGCCCACCTGTATGCATGTAGTATTACATACTGTCGGCCCCAAGTCCG
5780	11	21.8219	13	C	T	TGCAGGCTTACCYGAGCCTGGAACGATGTTGATTACCCCTTTGGGAAAGCCTGCTCTCACAGTCAGCTCAGCAAACTTCAGAGCTGTCAATGGTGT
15517	11	21.8219	33	C	G	TGCAGGGGGCACCATCCTCACAGTAATCCAACSCAACCGTTCAGAGTGAGGCCTTCAAAAGCTCAGAGTGGCCAGATGACAGAATGTTCGGAAGCA
15729	11	22.904	64	G	A	TGCAGGATGACTGGCCCAGTAAGTCCCACTTGCCTGGAGACATTTGAGATAGCAGCTCTTTGGRCCCAGTTCAGCCTGGTGTCCTCAACTACCTGA
7576	11	22.904	30	G	C	TGCAGGGATCTTTAAACTCAATCACAATASATGACACACTCCAGCACTGAAAATGTCCCCTGGAGAAAAATGGAACAGGATCCCACTGATCCTGTC
8265	11	23.9881	47	T	C	TGCAGGGGTCAGGAAATATACTTTCCATTATAGTAGACAGGCTGGAYCCAACATGCAATGCTGTATGTACCTTTTGCTATTTATATTACTCTATGG
5536	11	24.4393	79	C	G	TGCAGGAGATGCACTCAATCTTTGCGAAAAAAGGATGGAAGGCGGACTGGTGATGTCTCCACACCTTTCCCAGGACGTSCCCATCCACAAGGCGGA
11068	11	41.7127	40	T	C	TGCAGGAAACTCCTTATCGCTAGCTGCAGAGCCCCCTGCYCATGTGCGGCTGGATCACACACACTGACTAGTGCTTCAACACAGTTTACTCACATT
12684	11	42.1281	87	C	A	TGCAGGCTCGCCCCTCGTGGGGACTAACAGAGACGGACGGCCCCTAGGCTTCGGGCTGCCGACGCAAGCGGACTCTCGGTGCCCGCMCTGGGTTTC
9200	11	50.3261	70	C	T	TGCAGGCAGCTCACCAGGCTGGACATTACCTTCCAGGTGGCTCAGTAGATCTAAACCTCTTCCAGGCAAYTCAGCTGGTTTCAGTTTCTTCCAGGC
7637	11	51.3713	31	G	C	TGCAGGCCTGGACTCACAGCTGCGCCAGCCSCAAATAACACACAGAGACTCTGTATTGGATATGCTGTTGGCCAGTTACTAGTTTCTTATCGGCTA
9334	11	52.4554	18	A	G	TGCAGGGGACTTTTTAARCTAGAGGTTGATGGGGGAGAGCCCAGCCTATTGTGGGAGGTGCCATCCCTGGGCTAGAGTCCTGGGCTCTGTGGAAAG
4571	11	52.4878	80	A	C	TGCAGGGCCCTGTCCTGTTTGAGTTCCTGTCTTGAGTTCCTTCAGTGATAAGCAGAGATATGGGACTGTAAGCCAAATAMACCCTTTCCTCGCCAG
10863	12	0	82	C	G	TGCAGGAAAGCACCTGGCAAGGTTGTGAAATCTCTAGAGACTAATACGGTCACAGGATGGGGCAGCCACAGATGCACAGAGSGAATCACAAGACTC
11436	12	2.81321	58	C	A	TGCAGGGAAGTCCAGGACTCACCTGCTACTGTCCCTCTTCCTTTCCCAATAAACCCGMGTAGCCTTAACTTTTTCTCAGCTTCTGGGCTCTATGTA
5793	12	2.81321	63	C	G	TGCAGGGGTGGCAGCTGGCCTTCAGTACTTGGGAGACAGAGACAGGGGATCTCGAGAACAAASTGGGTCTCCACACTAGCCAAATCAGCAAGCTGT
16466	12	2.81321	70	T	C	TGCAGGACTGGTCAGGCACATAGTCCCCATCAGCAAAAGAGCTGGGAGCCAGGAGTCCCCTCAGGCACCYGTTAAATGCTTCCTGGAGAGAGACTC
2137	12	3.89391	59	T	G	TGCAGGTGCCAGAGCTTAGCTGAAGTGGGCCTGGCTGTCTCTGCTTGGCAGGGAGGCTKGTCTCTGTTCTGAGCTCATTGTCAGTGGGAGTGCTCA
6263	12	4.98809	35	T	C	TGCAGGTGAGGACACCAGCCCAGAGATGGTGCCTYCCACTTAGAGGGTGGGTCTTCCCAGCACAGTTATCCTAGTGGAGAAAACTTCACAGACTTG
6301	12	6.07942	16	T	G	TGCAGGCCAATCTCAKAGATGCACTTTCTCAGTCAAGACTCACATTCCAGACGGCTGTAGTTTGTGTCAAGTGTACCAAACACTAAGCGGCACTGG
11747	12	7.71304	79	T	A	TGCAGGCCAGCTGCCTGCTAGTCCTTCTGACCTCTCCACAGCTCTGTGTTTCTCTTGGTGGTCTGAACTCAACCTCTGWCATCCAACTGTGCCTCA
1488	12	9.34033	26	G	A	TGCAGGCATGTGACTATAGACACACRTGATGGGGATGTACATGTTTCTCTTATTGGTTGATGAATAAAACACCGATTGGCCAGTAGAGGTAGGAAG
9102	12	11.6604	54	G	T	TGCAGGTTCGGTATCAACCAGCTCCTGGCCGCATCATTCGGGAATTTGGGTGCKCTGTTGCTGGTCTCTCTGGCGTCCCTCCATATTTTTTGGCTT
9144	12	14.5376	84	G	T	TGCAGGGTCAGACTTTCAATGAGGAGATGACAGCTTGGATCAAGAGAGCACCAATAGAAACTATGAGAAAGGATCTTCAGGGTKAGGGCAGAGAAT
16326	12	19.0207	36	G	C	TGCAGGGCGCGTCTCCTAGCAGGGCTGTGTTTGGGSACAGGGCCCCGAGTGCGCTCCGCACACGGAATCAGAGGGGTCACAGCGGCGTCCCCAACA
5017	12	19.0207	11	C	A	TGCAGGCCAGMAGAGGGCACCAGATCTCATTGCAGATGGTTGTGAGCCACCATGTGGTTGCTGGGAATTGAACTCAGGAGCTCTGGAACAGTAGTC
8497	12	21.779	50	A	C	TGCAGGCCAGCCAGGGGCTGGAAGTTAGAAGTGCAGAAAGACGGATGGAMAAAGGTGTTTGTGACAGCAGAGCAGGGGTATGGACAAACAGCCATT
14615	12	22.8374	42	C	A	TGCAGGGAGAGCAAGTTAGAAGCTATTCAGTCACTGGGCCTMTAACTGTCCCTCTGCAGGTCACCAGCCACAGTGCACCCTAATGTCTCCATTCAC
15485	12	26.7477	28	A	G	TGCAGGTTTTGGCTCTCTGATATCACTRGCTTAGAAATTAAAGCGGAGGAAGAGTTGATGGCCTGAAAACAGCTCGAGGCAGGGCTCTTGTTGCAG
7434	12	30.0736	34	C	T	TGCAGGGTTAACAGATGTGGCACAAAGTCTCTTYCACAAAGTGTCTGTGCAGGGTTCAAGTCCTGACAACCCACTGCGCCATGACATGACTCTGGA
6461	12	31.143	61	G	A	TGCAGGTCCACCTTGGGGACGAACTTTGGGACATCCAGAGCAGCTGCAGACAAAGATCCTRCCTGAGGGGTCTGCTTCCATGGACTGTGTCAACTC
5226	12	32.2942	53	T	C	TGCAGGCTCCTGGGGTTTCTCCACCAGGCGCGCCACCGCACACCTAGCGCCTYGCAGAACCGCAGAGTACTCCCCATCTCCACCTGAGCCTCGGGA
10799	12	35.7032	43	A	G	TGCAGGAGAGCATGATGCATTGTCACCTCCAGCTCAGCTAAGRCATGAGCGGCATCCTCGCTGTCTTCCTGAGCCTCCAAGTCCTCCTCAGGGATG
1035	12	39.6131	54	G	A	TGCAGGTCCCAAGACAGCATGTATCAGCCATCCAGGCCTGACACTGGCAGGAARTAGAAGGCTTCATTGCCCCTTGCGCCCACACCCTCACCATGT
14448	12	40.6654	35	C	G	TGCAGGTGGCCAGTGTGTTTCTCACGGGGAAATCSTGATCACCTGTCGTGTTGGCTCCTAAGGAACTGCTGTTGTAAGCGGCTCTTCAAGAGTTGA
11120	12	44.5817	34	G	T	TGCAGGCCACACCAGAGGTGATATTTCTAGGCAKCTCAGGGTGGGAGTCTTCATGGTGGCAGGTCCTTGTCATGGGGGCGGGGTCCGTGTACCTTG
15528	12	46.7594	14	T	C	TGCAGGGAGCCTGYACTGTAGGACTGAGGTCACTCTGACCCTAGTGGGAATGGGTAAGGATACTGGATCTGGGAGCTCTAGCCAACTAAAGCCTAT
13771	12	48.9811	88	T	G	TGCAGGAGTCTGTGATGAGGCCAGCGCCAATGTCCACCTCCCTGGCTCACACTTTCACCCAGCTCGGTTCACTCTGTCTTCTCACCAKATCCCAGA
5466	12	49.5369	61	C	T	TGCAGGCCAGAAGAGGGCACCAGATCTCACTATAGATGGTTGTGAGCTGCTATGTGGTTCYTAGAAACTGAACTCAGGGCCTTAGGAAGAGCAGCC
9448	12	49.5369	72	G	A	TGCAGGTTCACCCTTCACCCTGCTGCTCATCCACCTGCCCTAGGGCCAGGGACTGCCAGCCACCTGGCTGGRTTTGTTCGGTGGGCTGCATCTGCT
14776	12	50.1215	60	C	A	TGCAGGCTGGCAGGCAGCAGAAAGGTGTTGGTTGTTTCTCTTGCTACATTGTATCACAGMAGGAACTGAGTACCAGGGGTCATCGTTTCTGGGTTT
13845	13	0	65	C	G	TGCAGGATCCTTATGCCTGTGTAGAGGCCCTTCCTGCAGTTCCCTGGGTTCCATACGCTGATGTSAATGCCTCATCAGCATGCAATGCAGTGCCCA
9051	13	1e-07	39	A	C	TGCAGGTGTGTGAAGCTTATATTAAGCACATACATGTAMATGAACATTTATGTGGGTTCACGAGCAATGAGTCAAGACCAATCTCATGAATGGACC
2080	13	0.538464	12	T	C	TGCAGGACCCCYGTGATTCAGTTTGCTTAGACGCTGTATCCTCTTTCACTCTTGGAATGTAGGCTACTGGGCTGAAGATAGTGTGTTCAAGGCAGA
2419	13	2.17884	17	T	C	TGCAGGGGCCGTGTGAYTCAGGGCCAATCCATGTCTGATTGGCAGGCACAGAGTCCATCTCCCATAAAGAGAGCCTGGAGATCAGCTGCAGGAGGT
13490	13	3.25267	19	T	C	TGCAGGTGGATAGAGGTTYTCCAGGAATTCAGATGCCCCTACTTTTGTGACTTCTATGGTTCTTCCTGGTCACCTGTCATGGTGCTGAGAGGTGTC
15991	13	5.39403	13	A	G	TGCAGGGAGACARTGGGATTCAGGGTTGATAGTTTAGGTTGGGTTGATGGGAAGAGCCCTCTGAGGACATGGCACCTAGCGGAGAGAGATGAATGA
12318	13	17.5541	73	A	G	TGCAGGTAAGGAGGATGACATGTAAAAATTTCCCATATGCCCCATTCTCGTCTCCTCCCTCAAGGTCCTGCTRTCCTCCAGGAGCTCCTTCACAGG
3771	13	20.2632	31	G	A	TGCAGGTGGAGGACAAGGAGGTATTGGCTGRGCATCGCTGCATCTCTGGGCCGCACTGCTATGTGTGCAGTGCCCTGACCGCACCCATCCTGAGGG
3829	13	21.3331	39	G	A	TGCAGGGTGTGGCTGACAGGAGACCTGGGGGTTTGGGTRACTAAGGGCTAGGGCACCGAAGCTCCAGGAGGCCCCCTTGGCCCAAGTGGACGAAGC
10136	13	22.9675	53	A	G	TGCAGGCATTCATGGACAGCTTTGTCCTCGGCTCTCTGAAGAAGAAGGACCCRAAAGACAAAGTCCCATCTGATGCCCATTCCATGAAAGCCCACG
5332	13	22.9675	12	C	T	TGCAGGCTCCCYGTGTCTACTGTGGATACCAACATGGTGTGGGTGATCCTGGGTCTCTTGTGGGCTCAGGCTTTGTCCCTCCCACTTTCTGACTGA
14127	13	28.6523	25	G	A	TGCAGGCTGCATGGTTTCCATCTCRGAGGAAACTATTGGAAATAGGCACACACGCAGAAGTCAGAAGAAAACTTGTGGTGTGGGCTCTCTTACTTC
14443	13	29.3977	66	T	C	TGCAGGGAGGCAGACCTGTGCCCCCAGGGAGCTAATGCCCAGCCATGTCCAGGTTCCACATCTGGYTCAGCTGGGGCCCTCTTCTAACAGTGTCCT
12727	13	30.5034	12	C	A	TGCAGGTCCCCMTACCCCGCTGGGGCATCAGTTATTCAGCTGTGACTTTTCTGTGATAACAGCCTTGGAGCCGTCATAGTTCCCACTCTGCTCTAG
11549	13	30.7126	37	T	G	TGCAGGTCCTAGAAAGGCTGTTTCAGAGGGGGTTCAKCGTGGCCGCCTCCTGCGGGGGTGGTGTGGATTCCTCTCAGTTCAGTGAGTATGTGCTTT
3	13	30.7126	29	G	T	TGCAGGGACCCCTCATGGTGACTGAAGCKCTCAAGCCATACTCTTCAGGAGGTCCCCGCGTCTGGTTTGTCTCTAACATCGATGGAACCCACATTG
6717	13	32.8988	79	T	A	TGCAGGCACGTCCAACTAAATATTCTTTACAATTATTAGACAGATCTTGGAAACATTTCAGTAGTTAGGTCCTATTATWAATTCCTCTACACACCA
3650	13	32.8988	45	C	T	TGCAGGCGGCGGGGCGCGTCAGTGCGTTCCTCTGCGTCCGCGCCYCGAGACGAGCATGCCCCTCCCGTACCCCCAACCACACCGCCAACCCCTTAC
904	13	32.8988	16	C	T	TGCAGGTGGAGCTAGYGCCCTGGGTACCAGTCTCAGGGACACGCACCCAGCACAGTGGACCCTTGAGTGCAGGCTGAGGCTTGCCCTGTGCAGCTG
8020	13	32.8988	35	A	G	TGCAGGCCTTGAAGCCTGTTCCTGGGACCCAGCTRCCTGGAGCTGTGATAGTGGGAGCCCCTGCATGAGAACTATGGAAAAGGCTGGGCCCTTTCT
2850	13	32.8988	36	A	G	TGCAGGTGGGGGAGGGGGCTAGAACTCGTTGCCTGRGTCCCTAAGGTTGGGACTCCAGGGTCCCTGAGCTGGGGGGCAGTGGGGCTGGATGCTAAT
8593	13	33.0918	53	G	A	TGCAGGAGGGAGAGGGTCTCGCTGGGGTCTCGGTGTGGGGGACCTGAGGGGGRACCCCAGGGAGAGCTGATGAGTGCTTACTTCCGATTAACCTGG
11732	13	33.0918	25	G	A	TGCAGGGGATTGGGTTGGGACGGGRTGGGGCCGAGCCTGCACACTTACACAGCACGTTGAGGCGGTAGAAGGAGCTCACGGTTTCACGAAGTGCAG
10934	13	33.8229	56	G	A	TGCAGGCCAGCACCCAACCAACACTCAAGGAGCAGCCAGTATCACCAGTAAATGCRATGCCTCCATTTTACAGACCTGAAAGCTAAGGCACAGAAA
14555	13	34.9062	32	T	C	TGCAGGTGGCTCTGCTTTCCCAGACGCTGATYCTGGTTTTTCTCCTTCCCCAGGTCAGGCTCAGCGGGATTCAGAAAAGAAGGGACAGATGGGGTC
16284	13	34.9062	12	A	G	TGCAGGCGTGCRGCGTGCTCCTGCTTGCGCTTCATGTCATTGATGTACCAGGCCACTGCAGTCATGGACACAATGGCTTCCTCAACCATCTCTCGC
14098	13	36.5388	84	A	G	TGCAGGACGAAATTCACGTCGGGGCAGTGGTGGCTCAGCCAGGTCAGCAGCAGTAGGTCTTTGAGTGTCTGGTTGTAGGGGACRTCCAGGAAGTCC
4691	13	37.871	15	C	T	TGCAGGCACACGTGYGTGGCGTCTCTTCAGCCAAGCACACCGTAGCTTTGCTTTCAGTTTCCATGCAGGCCTGTCTCTGAGGACTGCACCAAGTCC
13989	13	38.4264	50	G	A	TGCAGGGGGCCCTCGTGCTGCCCAGCGGGGGAGTCTGGTGGGAGGAAAARAAGCAGTGTAGCGGGAAAGTTGAACTTTGCGGCCCCTGGTGGAGGT
3243	13	40.4019	65	T	A	TGCAGGGTTGAGGCCTCGCAAGGTGAGGTTGAGTTTGTTGTTGCATCGGTCCTCGGTGCACTGCWGCAGCTGAATGAAGGCCAGGAGCCCGTGCAG
6340	13	41.4786	43	G	C	TGCAGGGCCCTGGGCCGCATCTAGCTGGGAAGGAAGCAGGCCSCAAAGGACATTAAATAATGTTAGCTTTTATTTCACTACAGGAACCCAGAGCGT
3566	13	41.4786	82	C	T	TGCAGGTCAGAACATCTCATTACAGATGGTTGTGAGCCACCATGTGGTTGCTGGGAATTGAACTCAGGACCTCTGGAAGAGYAGCCAGTGCTCACA
7170	13	41.4786	14	A	G	TGCAGGGTTTGGCRGTCAGAAGACAACCTTTGCGTGTGCTCTCTCCTTGTATCTTGGGGGTCCTGGGGACCAGACTCGGTGGTCCAGTGTCGGGTT
14320	13	41.4786	26	A	G	TGCAGGCCAAGATGGAGAAGCTGCGRCAAGCGAGGCGGTCTGACTCCCTCTCATGCTAGGGCAGCATCAGCGACACCCTGAAGTGGACCCAAGCCC
15626	13	42.5597	62	A	G	TGCAGGTTGGGGGGCCGCGATCCCTCGCTGTTTGTGTGGTTTCTCATCGGAGAAAGGGCAGRGTGAAATGGCCACCGAAGTCCCTCAGAGCTTTAA
13748	13	42.5597	14	G	C	TGCAGGTGCGTCTSTGTGAAGGTGTCAGATCTTGGAGTAACAGTCAGTTGCGTGCTGCCATGTACGTGCTCAGAATTAAACCCTAGTCCTCTGGAT
1080	13	43.0974	16	G	T	TGCAGGGTTTGTGGAKGTTCTGGGGTCCGTGCGGGTCCACTGAAGGGCTCAAATAGTTAAGCGGAGCTTGGGTTGCCTCTGCCTCTGGGGCGGTGC
2719	13	43.0974	48	C	T	TGCAGGCAAGTAGTAACAGAGACACTTATCTAGATGGTTCCCAGACAYGAAGTACAGTTCCCATAGCCATCTTTAAGTGGCTACAGAAGGACACAG
13321	13	43.6351	11	G	A	TGCAGGATGGRCCCATCTCCCGAGTGATTGTGTTCAGCCTGTCCAGCCCTGACGGTGAGCTCTTCATTGGAGGGTGGGCGCTACAAGCCCAGCTTT
14672	13	43.6351	53	C	A	TGCAGGCCCAAATGGCTGGAGGGCAGTGCTAGGGACCTTACACAAGGGGCTTMAGGTCTGGACGCGCATCGCAGAGATGGATAGACAAGGGAGGAA
3402	13	45.9502	38	G	A	TGCAGGACTAGGTCATGAAGATTTGTGGTGTGGCCCTRGGGAGACACCTTGTCTGGAGGATTTCACTCTGCCGATCCTGCTGTGCCTGGCGGCTTT
14369	13	47.7095	48	G	A	TGCAGGCTGTGTAGTGTGCTCCAGGCTCCCAGCTTTACTGAGCTGTCRTCATGCTGGGGTGGGTTCTGATAATGATGCAGCTGTCTTGTTATTTCT
1607	13	48.2409	58	G	A	TGCAGGGCCTTGGAGGCCTCCGCCAGCTCAGTTAGAAGGACCGTAGTGGCTGACCTCRGTAGCATACATCTGTAATGCCAGCACTTGGGAGGGGAA
15003	13	48.2409	49	G	T	TGCAGGTCTTCAGGGTCACTCCCGAGCAGCTCACCCTAACCACCAGCGKGTAACTGAAAACTGCCAACAGCAAACCCTCTTCAGTAATCTACTGTG
14988	13	48.2409	25	C	T	TGCAGGCCAGAAGAGGGCACCAGAYCTCATTACAGATGGCTGTGAGCCACCATGAGGTTGCAGGAAATTAACTCAGGACCTCTGGAAGAGCAGCCA
15210	13	48.2409	68	C	A	TGCAGGAGGACGTGAGCTCTGGGGTCCCCAGACCCAGGGAAACACAGTCTGCAACCCAGAGCAAGAGMGACAAAGGCAGGTGCCAAGTCAGCGAGA
1020	13	49.8773	27	T	C	TGCAGGCTGCCTTGGCTGGGGCCCCAYGTCAGGCAAGAGTTAGTTATAGCAGGCACCAGAGGGCTTGACTAGATTAACGGGAGACCCACAGGAGAA
7191	13	49.9069	87	C	T	TGCAGGGCTGGGAACTTTATATCTGTGTTTCCCACAGGTGACCCTCTGCGTTTCCATGCTCACTACATTGCTCAGTGCTGGGCTGCYGAAGACCCC
4562	X	0	59	T	G	TGCAGGTGCAAGCGATCCAATCACTGACGCCAACGGCAGCCGCCTTAGAAGGCAGTTAKTTGCGTTCGGGCTTTCTTAAGATGGCCGCGGCTCGGG
11654	X	3.70167	57	A	G	TGCAGGGAAAAAAAGGGAGGAAGATTGTCAGCTCTCTGCTACTGCTGCTGTAGGCARTAGGTCACCATAAGGTCTGCCTTAGTGGACAGAAGTTGG
16062	X	3.70167	39	G	C	TGCAGGAAAGGGAACGAGAACAATGTGAGTATGGGTTGSCTCAACATATTGAGATGCTTCACAACTTGCCATATGAACGGTCGACAGCACAACAAC
623	X	6.96318	54	T	C	TGCAGGCGGACGTTGAGCATCACCGAGGCCAACATGTAGAAGTAGGGGAAGTTYACCCGCAGCCGCCAGGCCAGGTCGAAGAAGGTGAGCAGAGTG
13454	X	15.5245	80	C	A	TGCAGGTTGGTTATGCCTGCGTAGGCTTTAAGAAGATTATCCTTAAAAATAGGTGACCCTTACGCAATCAGTTCAAGAAMATTAAAAGTAAAAATG
12542	X	28.8886	63	T	C	TGCAGGGCAATGGACCCAGACATGGCCCTTGGCAGCAGCCAGGACCCGAATGTCTCCACAGCYCCAGGTGGTAGCACAGGCCACACAGATCAGTGT
7140	X	28.8886	21	C	T	TGCAGGTTCTCGGATAGCCTYTCTCTGCTTTTAGTGCTTAAAAGAGCGGTTTGGGGGCTGTCTGACATTGGAAAGCAGGTGTTCAGAAGCATGGCC
7731	X	28.8886	56	A	G	TGCAGGTGATTATCTGGTGTAAGTTAAAGCACTTTTTTCATTTTAGAACCAAGGCRGACGCTTGAAACCTTGTTATCCAGTAGAGGGCGCTCCTGA
14921	X	28.8886	16	T	C	TGCAGGGCTCAGGCCYTGTCTGTAAGGGGATGAACTACTGCAAATCAGTGGCAGCTGTGCCACTATAATGATAAAAGCCTGCATCTTCATGAGATA
8558	X	29.6312	21	C	T	TGCAGGCTAGATCCTTGAACYCATTGCAGGACCTCTGCTAGAGAGACCCTACTCAGTTGGAGAGTGCCAGCTAGACAAGCCTATCAGTGCAGAAAT
7386	X	29.6312	31	C	T	TGCAGGAAGAAATTTTTAAGCAACCAAATTYCTCAACAGAACTGGCTGTAACATATGTAGGTAGTCATTGTGTGGCAGAAAATGCTTGACTGGAAT
4461	X	31.1054	82	T	C	TGCAGGCTTCTAGGCCTGCCCTGCCAGCAACCCTCTTGTTGGCCACACCCTCTTTGCTTGTTTACACTGCTGAGTTCACAGYATGGTATATAGCAG
6971	X	31.1054	32	A	T	TGCAGGAGGCAGCACTTCTCACACCCTGCCCWGATGCCCCTTCGGTCTGTTCTGTTGCTGTCTTTACTTCTGGTGGCCCTAGCTTAGAGCAAGCTT
867	X	31.1054	39	T	C	TGCAGGGATGATGCAGGAGGATACTAAGTACTTTGGTTYGCTTTCTGTTGCCAAAAGCAACCTGGGGAGGAAAAGGTTCTTTTGGTACACTTCCAG
3628	X	31.1054	61	T	G	TGCAGGCTCTGCCTCCTTTGAGCCCCTTGTGGTGGAGAGGGGCCATAGAGGCCCGCTTTAKATCTACCAATCTCTTGCCCAGCCTGCCTTTCCTGC
16498	X	31.8451	80	A	G	TGCAGGGTCTAGAAAAGGGTGTAGGATCCCCAGGAACTGAGGTTACAGGTGGTTGTGAGCCTGCATGTGAATGCTCAGARTTGAACCAGGGTCTAC
16442	X	32.5687	20	T	C	TGCAGGCTACTTTAGGGACYAGGAGCCCAGTGGGTTTGGGGAAAGTTAAAGGAATATTAATAAAAGGCAATATATTCAAAACATAATTAAAGTGCT
12798	X	32.5687	50	G	C	TGCAGGAACTCAGAGAGGTCCAACAGAGATAGGTGGATATCAGGGAGGGSCCCAGAACTCCAGTAGAAGACTGGTGGTAGGGGTCAGAAGCCAGGC
6834	X	33.2847	81	A	G	TGCAGGATCTTTGATACCCATCGCTAGGCCTTTCCTGGAGCCTGATCTTTGACCCCCATCACTGGACCCCTGCCTGATGARAGACCTCCTAGAGAG
9912	X	33.2847	45	A	T	TGCAGGCTGTGTCTGGAGGTTCCCTACTTGGAGTTACAGTTACAWTTCCCAACATGGCGTCCAAGCTGATGCATGTGGGCAATAGAGTTGCAGGCA
8428	X	33.2847	76	C	A	TGCAGGTGGCGCACTTACGTTTTTCTAAAGGCCTCAAGACCTGAGAAATGCCTGAGGGACTGGTAGAGAACTTTAMTATTAGAGTCAGGGAGCAGT
5748	X	34.0058	70	A	G	TGCAGGTATTATTCCACAGGACCAGTCCCTTCATGAGCTCCTGCAAGACCCAGATGCAGTAGATGTTAGRGTGGGTCAAGCCAGTAGGCCAGGCAG
13705	X	34.0058	45	C	A	TGCAGGCATATTTCACCTGCTATCTTTCCTTGCTTTGATAGCTAMAGGAACTATTCAAATAATCTTGTTCTTTTCTCCAGAAACATCTTTAACAGC
16356	X	34.7324	90	T	C	TGCAGGCTTCCACAAAGCTCTAGCATGGCGATGGCTATTGTCCCCAAGCCTTTCACCAGGTCTGCCTTGCTTCTGCTTCCTAGTGTCAGYTAATTC
5251	X	34.7324	23	C	G	TGCAGGCCATGACACAAAGCATSCTGAAAAGGAGTTGGAGATGCCTGATATCCCTTGGTTTTGTTGATGGGAGATGTTATTCTGTAAATATGTTTC
587	X	35.459	19	C	T	TGCAGGTACACTCGTCCAYTGCACACCCTCCTGAGTGCACTGGTAGTGGTGGTGGCCCTCGGGGTGCTGGTGTGGGCTGCTGAAACCCGTGCAGCT
12532	X	35.459	56	G	A	TGCAGGCCAGAAAAGGGCATCAATTTTCATTATGGATAGTTGTGAACCACCATGTRGTTGCTGGGAGTTGAACTCAGGACCTCTGGAAGAGCAGCC
14565	X	35.459	19	A	G	TGCAGGGCAACACAAGCARGTCCACACTGTGCAGGGTATGGAGAGAAGGGAGTGGTGACTTGACAGGACTGTGTCAGAACCTCTGGGTCCTATCCT
820	X	35.459	57	C	T	TGCAGGGGATGCTAGGACAGACTGTACACAGGCAACTTCTGTGGCCAGACCCATGGYCACTAACTTGCATGATTGGAACTGTGCTGTTACATATGG
10246	X	35.459	48	G	A	TGCAGGCCCTCTCTGAGTTCCTATGGGCTAGATCCTTTACCCCCATCRTCAGGCCTCTGCTTAAGAGACCTCAGCTGGAGAGTGCCAGACCCAGCT
